# Supplementary material for: Hospital at Home care for older patients with cognitive impairment: a protocol for a randomised controlled feasibility trial
Source: PubMed Central journal article supplement (PMC5875621; doi:10.1136/bmjopen-2017-020332), 2018-03-27
Supplement: bmjopen-2017-020332.draft_revisions.pdf [file bmjopen-2017-020332.draft_revisions.pdf]

# BMJ Open

BMJ Open is committed to open peer review. As part of this commitment we make the peer review history of every article we publish publicly available.

When an article is published we post the peer reviewers' comments and the authors' responses online. We also post the versions of the paper that were used during peer review. These are the versions that the peer review comments apply to.

The versions of the paper that follow are the versions that were submitted during the peer review process. They are not the versions of record or the final published versions. They should not be cited or distributed as the published version of this manuscript.

BMJ Open is an open access journal and the full, final, typeset and author-corrected version of record of the manuscript is available on our site with no access controls, subscription charges or pay-per-view fees (<http://bmjopen.bmj.com>).

If you have any questions on BMJ Open's open peer review process please email [editorial.bmjopen@bmj.com](mailto:editorial.bmjopen@bmj.com)

# BMJ Open

## Hospital at Home care for older patients with cognitive impairment: A protocol for a randomized controlled feasibility trial

|                               |                                                                                                                                                                                                                                                                                                                                                                                                                                                                                                                          |
|-------------------------------|--------------------------------------------------------------------------------------------------------------------------------------------------------------------------------------------------------------------------------------------------------------------------------------------------------------------------------------------------------------------------------------------------------------------------------------------------------------------------------------------------------------------------|
| Journal:                      | <i>BMJ Open</i>                                                                                                                                                                                                                                                                                                                                                                                                                                                                                                          |
| Manuscript ID                 | bmjopen-2017-020332                                                                                                                                                                                                                                                                                                                                                                                                                                                                                                      |
| Article Type:                 | Protocol                                                                                                                                                                                                                                                                                                                                                                                                                                                                                                                 |
| Date Submitted by the Author: | 30-Oct-2017                                                                                                                                                                                                                                                                                                                                                                                                                                                                                                              |
| Complete List of Authors:     | Pouw, Maaïke; Universitair Medisch Centrum Groningen, Geriatrics; Martini Ziekenhuis, Internal Medicine<br>Calf, Agneta; Universitair Medisch Centrum Groningen, Geriatrics<br>van Munster, Barbara; Universitair Medisch Centrum Groningen, Geriatrics;<br>Gelre Ziekenhuizen, Geriatrics<br>ter Maaten, Jan; Universitair Medisch Centrum Groningen, Internal Medicine, Emergency Medicine<br>Smidt, Nynke; University of Groningen, Epidemiology<br>De Roolj, Sophia; University Medical Center Groningen, Geriatrics |
| Keywords:                     | Dementia < NEUROLOGY, Organisation of health services < HEALTH SERVICES ADMINISTRATION & MANAGEMENT, GERIATRIC MEDICINE, Delirium & cognitive disorders < PSYCHIATRY, INTERNAL MEDICINE                                                                                                                                                                                                                                                                                                                                  |
|                               |                                                                                                                                                                                                                                                                                                                                                                                                                                                                                                                          |

SCHOLARONE™  
Manuscripts

**Public title**

Hospital at Home care for older patients with cognitive impairment and an acute medical illness

**Scientific title**

Hospital at Home care for older patients with cognitive impairment: A protocol for a randomized controlled feasibility trial

Maaïke A Pouw,<sup>1,2</sup> Agneta H Calf,<sup>1</sup> Barbara C van Munster,<sup>1,3</sup> Jan C ter Maaten,<sup>4</sup> Nynke Smidt,<sup>1,5</sup> & Sophia E de Rooij<sup>1</sup>

**Acronym**

H@H

**Abstract**

**INTRODUCTION:** An acute hospital admission is a stressful life event for older people, particularly for those with cognitive impairment. The hospitalisation is often complicated by hospital-associated geriatric syndromes, including delirium and functional loss, leading to functional decline and nursing home admission. Hospital at Home care aims to avoid hospitalisation-associated adverse outcomes in older patients with cognitive impairment by providing hospital care in the patient's own environment.

**METHODS AND ANALYSIS:** This randomized, non-blinded feasibility trial aims to assess the feasibility of conducting a randomized controlled trial in terms of the recruitment, use and acceptability of Hospital at Home care for older patients with cognitive impairment. The quality of care will be evaluated and the advantages and disadvantages of the Hospital at Home care program compared to usual hospital care. Eligible patients will be randomized either to Hospital at Home care in their own environment or usual hospital care. The intervention consists of hospital level care provided at patients' homes, including visits from health care professionals, diagnostics (laboratory tests, blood cultures) and treatment. The control group will receive usual hospital care. Measurements will be conducted at baseline, during admission, at discharge and at three and six months after the baseline assessment.

**ETHICS AND DISSEMINATION:** Institutional ethics approval has been granted. The findings will be disseminated through public lectures, professional and scientific conferences, as well as peer-reviewed journal articles. The study findings will contribute to knowledge on the implementation of Hospital at Home care for older patients with cognitive disorders. The results will be used to inform and support strategies to deliver eligible care to older patients with cognitive impairment.

**TRIAL REGISTRATION:** This study was registered with the NTR registry (NTR6581) on 26 July 2017.

**Keywords:** Dementia, Cognition disorders, Central Nervous System Diseases, Aged, Home Care Services; Hospital-Based, Hospitalization, Randomized Controlled Trials, Hospital at Home

## Strengths and limitations of this study

---

- This study addresses patients with cognitive impairment, a population who might benefit most of the Hospital at Home care concept, but is often excluded from participation in scientific research.
- As a feasibility trial does not show effectiveness, it will support the implementation of Hospital at Home care and a future trial
- This study is clinically relevant as it investigates patient centred care instead of hospital centred care

## Introduction

---

### Background

An acute hospital admission is a stressful life event, particularly for older people. In addition to the stress of an acute illness, the hospital admission itself contributes to this stress.<sup>1</sup> Older hospitalized patients are often deprived of sleep, and they spend an average of 20 of every 24 hours in bed, they become poorly nourished, and experience sensory deprivation or overstimulation, resulting in confusion.<sup>2-5</sup> These adverse effects of hospitalization contribute to the occurrence of geriatric conditions, such as delirium, functional decline, falls, incontinence, hospital acquired infections and pressure injuries.<sup>6-9</sup> Adverse effects of hospitalization occur more easily in older people, particularly in those who are already frail, a growing portion of the worldwide ageing population.<sup>10,11</sup> Frailty is a state of increased vulnerability to external stressors resulting from aging-associated declines in reserve and function across multiple physiologic systems.<sup>10</sup> Cognitive impairment (i.e., dementia) is an important contributor to frailty in older people.<sup>12</sup> Cognitively impaired older people are more likely to become hospitalised and once admitted, they experience longer stays than their peers without cognitive impairment.<sup>13-15</sup> The combination of hospitalization and cognitive impairment in older people is associated with further functional and cognitive declines and higher mortality rates, and it leads to more discharges to long-term care facilities.<sup>16,17</sup> The prevalence and worldwide burden of cognitive impairment will continue to increase as the average life expectancy increases.<sup>18</sup> The total number of people with cognitive impairment is estimated to be 75.6 million in 2030 and will nearly triple in 2050 to 135.5 million.<sup>19</sup> An increase in the number of hospital admissions of older people with cognitive impairment and an increase in number of hospitalisation-associated adverse outcomes are therefore to be expected.

Besides adverse outcomes of hospitalization, many older people and their caregivers do not necessarily desire a hospital admission in case of an acute illness or exacerbation of a chronic illness. Fried et al. (2000) have studied the preferences of community-dwelling persons 65 years of age and

1  
2  
3 76 older who were hospitalized with a primary diagnosis of congestive heart failure, chronic obstructive  
4 77 pulmonary disease or pneumonia. The authors reported that over 50% of older patients preferred to  
5 78 receive hospital treatment at home, because they felt that their homes were more comfortable.<sup>20</sup> In  
6 79 the treatment preferences of seriously ill patients 60 years of age and older, the likelihood of  
7 80 cognitive and functional impairment as an adverse outcome of the treatment was weighed in the  
8 81 decision-making process. There was a substantial decrease in the number of participants who opted  
9 82 for treatment if the likelihood of impairment after treatment was 50% or higher.<sup>21</sup>  
10  
11  
12  
13  
14

15 84 Hospital at Home care could provide an effective alternative to inpatient care for a select group of  
16 85 elderly patients now requiring hospitalisation. Hospital at Home care is coordinated, multidisciplinary  
17 86 care in the homes of people who would otherwise be admitted to the hospital. Hospital at home care  
18 87 is an accepted alternative to inpatient hospital level care in several countries (e.g., the United States,  
19 88 Australia, Italy and the United Kingdom) but not yet in the Netherlands.<sup>22</sup> Since the 1990s, Hospital at  
20 89 Home has been evaluated in (older) persons with various acute medical conditions, such as heart  
21 90 failure, exacerbations in chronic obstructive pulmonary disease (COPD) and infections (e.g., cellulitis,  
22 91 pneumonia).<sup>22</sup> In a systematic review comparing alternative strategies to inpatient hospitalization,  
23 92 lower or equal mortality rates and return hospitalization rates (i.e., subsequent admissions after  
24 93 discharge) were found for Hospital at Home care, and there was a positive effect on patient and  
25 94 caregiver satisfaction.<sup>22,23</sup> Only one trial conducted in Italy included 109 patients with cognitive  
26 95 impairment (i.e. dementia), Tibaldi et al. reported a positive effect of a Hospital at Home intervention  
27 96 on behavioural disturbances and caregiver stress in patients with dementia.<sup>24</sup> Whether Hospital at  
28 97 Home care provides a suitable alternative with regard to other outcomes as patient satisfaction,  
29 98 quality of care, hospitalisation-associated adverse events and costs in older people with cognitive  
30 99 impairment remains unclear and further research is needed. Therefore, our primary aim is to  
31 100 investigate the feasibility of a Hospital at Home care program for older patients with cognitive  
32 101 impairment in terms of the patient recruitment, use and acceptability, and secondly to investigate  
33 102 the advantages and disadvantages of Hospital at Home care compared to usual hospital care from  
34 103 different perspectives.  
35  
36  
37  
38  
39  
40  
41  
42  
43  
44  
45  
46  
47

48 105 Objectives of this study are:

- 49 106 1) To assess the participation rate of the Hospital at Home trial among patients 65 years and older  
50 107 with cognitive impairment, acute illness, and emergency hospital admission. What are the reasons  
51 108 for non-participation?  
52 109 2) To assess the differences in the quality of care provided in the Hospital at Home care group and  
53 110 the usual hospital care group with regard to geriatric syndromes, institutionalization, mortality, total  
54  
55  
56  
57  
58

1  
2  
3 111 days with urinary catheter, length of stay (in the hospital or in Hospital at Home care) and  
4 112 timing/intensity of the contact with health care professionals.  
5  
6 113 3) To assess the potential advantages and disadvantages of Hospital at Home care and usual hospital  
7 114 care for the patients, caregivers and Dutch medical health system.  
8  
9

## 115 **Methods and analysis**

---

116

### 117 **Trial design**

118 The design is a randomized controlled feasibility trial and will utilize a process evaluation. This study  
119 will be conducted at the medical emergency department (ED) of the academic hospital of the  
120 University Medical Center of Groningen in the Netherlands and will evaluate cognitively impaired  
121 older patients who are in need of acute hospital care. Figure 1 shows the trial design summary.  
122 Participants will be randomized to either Hospital at Home care or usual hospital care in a 4:1 ratio,  
123 respectively. Patients will be randomized using a computerized random number generator  
124 (<http://www.randomization.com>), including block randomization.

125 An independent research nurse who is not involved in the patient care will complete the baseline  
126 assessment and allocate the participants (using sealed sequenced envelopes) into the Hospital at  
127 Home care (intervention) or usual hospital care group (control). The research nurse will not be aware  
128 of the randomization method. The participants, health care professionals and research staff will not  
129 be blinded to the intervention. The reporting of the design of this trial protocol is in accordance with  
130 the SPIRIT 2013 statement for clinical trial protocols.<sup>25</sup>  
131

131

Only

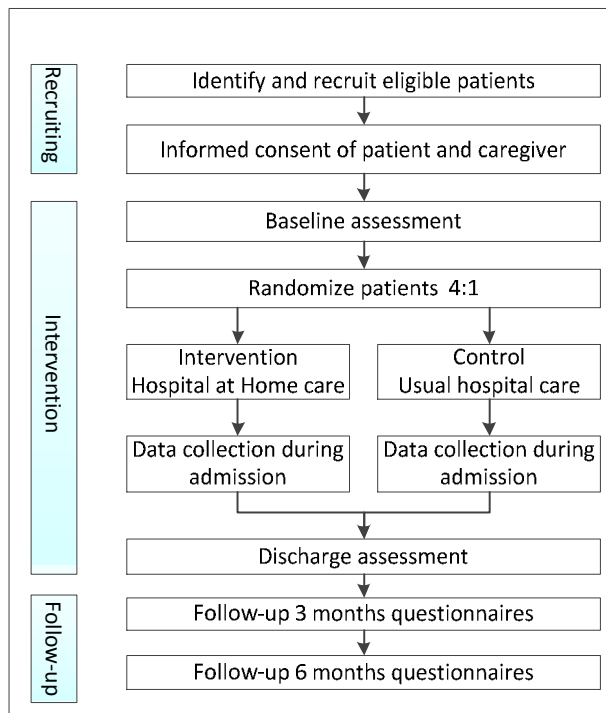132  
133

Figure 1: Flowchart of trial design summary

134 **Study population**

135 Patients 65 years of age and older who are admitted to the medical emergency department (ED) will  
 136 be identified by the ED staff as potential eligible patients. Subsequently, the ED staff will inform the  
 137 research nurse. The research nurse will complete the eligibility criteria checklist (table 1). The  
 138 research nurse will ask the patient and their informal caregiver (i.e., partner, child, relative, friend)  
 139 for their willingness to participate in the study and to provide written informed consent. The patient  
 140 and informal caregiver will need to both sign the informed consent form before the patient can  
 141 participate in the H@H trial.

142 If the participant lacks the capacity to consent (mentally incapacitated), and an informal caregiver  
 143 (i.e., partner, child, friend) is present, this informal caregiver will be asked to act as a personal  
 144 consultee. The personal consultee will determine whether he or she believes that participation in the  
 145 study would be in accordance with the values and interests of the individual and will subsequently  
 146 sign the patient's informed consent form.

147

148 **Table 1** Patient eligibility criteria for participation in Hospital at Home trial

| Inclusion criteria                                                                                                                                                                                                                                                                                                                                                                                                                                                                                                                                                                                                                                                                                                                                                                                                                                                                                                                                                                                                                                                                                                                                    | Exclusion criteria                                                                                                                                                                                                                                                                                                                                                                                                                                                                                                                                                                                                                                                                                                               |
|-------------------------------------------------------------------------------------------------------------------------------------------------------------------------------------------------------------------------------------------------------------------------------------------------------------------------------------------------------------------------------------------------------------------------------------------------------------------------------------------------------------------------------------------------------------------------------------------------------------------------------------------------------------------------------------------------------------------------------------------------------------------------------------------------------------------------------------------------------------------------------------------------------------------------------------------------------------------------------------------------------------------------------------------------------------------------------------------------------------------------------------------------------|----------------------------------------------------------------------------------------------------------------------------------------------------------------------------------------------------------------------------------------------------------------------------------------------------------------------------------------------------------------------------------------------------------------------------------------------------------------------------------------------------------------------------------------------------------------------------------------------------------------------------------------------------------------------------------------------------------------------------------|
| <ul style="list-style-type: none"> <li>▪ Age 65 years of age and older</li> <li>▪ Cognitive impairment, i.e. dementia, delirium or other cause of cognitive impairment, and either:               <ul style="list-style-type: none"> <li>○ previously diagnosed or documented in the medical records or</li> <li>○ identified by the ED-clinician (e.g., with the 4AT-test and/or Six item cognitive impairment test)<sup>26-28</sup></li> </ul> </li> <li>▪ Presented at the ED with a defined acute illness</li> <li>▪ Required hospital admission, according to the attending ED physician but not expected to require emergency interventions               <ul style="list-style-type: none"> <li>○ Modified Early Warning Score (MEWS) <math>\leq 2</math> points<sup>29-31</sup></li> </ul> </li> <li>▪ Living in hospital's catchment area (&lt; 25 km)</li> <li>▪ Informal caregiver is present and able to understand and perform instructions and consented to participate in the trial</li> <li>▪ Home suitable for Hospital at Home care (available informal caregiver, running water, adequate heating, safety)<sup>28</sup></li> </ul> | <ul style="list-style-type: none"> <li>▪ Previously enrolled</li> <li>▪ Hospitalized within the seven days preceding ED presentation</li> <li>▪ Nursing home residents or awaiting a nursing home place on an active waiting list (excluding so-called sleeping waiting list candidates)<sup>27</sup></li> <li>▪ Additional care needed               <ul style="list-style-type: none"> <li>○ Required surgical assessment</li> <li>○ Suspected acute coronary syndrome or cardiac arrhythmia<sup>31</sup></li> <li>○ Dialysis dependent patients<sup>31</sup></li> <li>○ Expected terminal events<sup>31</sup> or in need of diagnostic or palliative care due to oncological or haematological illness</li> </ul> </li> </ul> |

149 ED= Emergency department

### 151 **Sample size of study population**

152 Based on the numbers available from the emergency department (ED) of the University Medical  
 153 Center Groningen, the Netherlands, we calculated that an average of 3990 older patients 65 years  
 154 and over is admitted to our medical ED each year. The Hospital at Home trial will be introduced  
 155 during working hours, which provides an estimated 1900 patients per year. Not all 1900 patients will  
 156 be eligible for study inclusion. Based on screening of ED medical records, approximately 15% of the  
 157 patients meet the eligibility criteria for Hospital at Home care, resulting in 285 eligible persons per  
 158 year. In recent randomized controlled trials (RCTs) of Hospital at Home care in Italy, 54% and 57% of  
 159 the eligible patients was willing to participate and gave informed consent.<sup>32,33</sup> We presume a similar  
 160 consent rate of 50%, as described in these previous clinical trials, and expect for 143 patients to be  
 161 included.

### 162 **Study procedures**

163 After (written) informed consent is obtained, the participants will complete two brief cognitive tests,  
 164 and the participant and caregiver will complete the baseline assessment. Subsequently,  
 165 randomization takes place to either (a) the Hospital at Home care-intervention, translocation of care  
 166 from the hospital to a participants' home or (b) the control group, usual hospital care. All care will be  
 167 delivered according to hospital protocols, current regulations and guidelines and, if needed,



1  
2  
3 168 described in the standard operating procedures (SOPs). If no informed consent is given by either the  
4 169 patient or the caregiver, the reasons for non-participation, date of birth, sex of the patient and the  
5  
6 170 relationship between patient and caregiver will be reported.  
7

## 8 171 **Intervention**

### 9 172 **Hospital at Home care**

10 173 Hospital at Home care will be delivered by a multidisciplinary team consisting of a physician, nurse  
11  
12 174 and physiotherapist. Depending on the participants' needs, other disciplines (e.g., a dietician,  
13  
14 175 occupational therapist or social services) can be involved in the Hospital at Home care. The day-to-  
15  
16 176 day care will be provided by the nurse and physician visiting the participant. The Hospital at Home  
17  
18 177 care team works under the responsibility of the medical specialist in the hospital, and 24/7  
19  
20 178 consultation of the expertise and services of the hospital is part of the protocol.  
21

22 179  
23 180 The participants allocated to Hospital at Home care will receive hospital level care in their own  
24  
25 181 homes. After a stay of one night in the hospital, while the Hospital at Home care arrangements are  
26  
27 182 being made, the participant will be transferred home and receive Hospital at Home care. The  
28  
29 183 Hospital at Home nurse is responsible for the day-to-day care and will be present upon arrival of the  
30  
31 184 participant at his/her residence. Hospital at Home care is described in the care protocols including  
32  
33 185 SOPs and could include intravenous therapy (e.g., antibiotics, fluid, and/or diuretics), oxygen therapy,  
34  
35 186 and/or nebulizer, indwelling urine catheter or a nasopharyngeal food tube. After the care intake and  
36  
37 187 a period of direct nursing supervision, the participant will receive intermittent nursing visits daily  
38  
39 188 (starting with 3x/day). The Hospital at Home physician will make a home visit every day (excl.  
40  
41 189 weekends). The Hospital at Home physician and nurse will be available for emergency visits. The  
42  
43 190 participant will receive a medical alert device in the house, with a 24/7 connection to an on-call  
44  
45 191 service. Alert instructions will be explained to the participant and caregiver. A physiotherapist will  
46  
47 192 visit the participant at home to evaluate any problems with balance and/or walking and immobility.  
48  
49 193 The Hospital at Home team works under the supervision of the hospital medical specialist. Daily  
50  
51 194 screenings and measurements will be recorded in a Hospital at Home record, which stays with the  
52  
53 195 participant. Diagnostic procedures and therapeutics that cannot wait and are not available at home,  
54  
55 196 such as endoscopy or CT-scan, will be arranged through brief visits to the hospital. The participant  
56  
57 197 will be 'admitted' to the Hospital at Home care for as long as indicated.  
58

### 52 198 *Discharge from Hospital at Home*

53 199 If the participant recovers to such an extent that hospital level care is no longer needed, the  
54  
55 200 participant will be discharged from the Hospital at Home care program, similar to the discharge  
56  
57 201 procedure when the participant would receive usual hospital care. Hospital at Home care will end  
58

1  
2  
3 202 with discharge planning with the participant, family, Hospital at Home physician and nurse. The  
4 203 discharge plan includes follow-up appointments (e.g., at the hospital or general practitioner),  
5  
6 204 information on medication, warning signs and symptoms and an on-going management plan. All  
7  
8 205 hospital-related care equipment will be removed from the participants' house, and arrangements  
9  
10 206 with homecare agencies and/or paramedical staff will be reviewed and adjusted to the current  
11  
12 207 situation.

### 13 208 **Hospital care as usual**

14 209 Participants allocated to the control arm will be admitted to a hospital ward and receive usual  
15  
16 210 hospital care. After admission and intake on the ward, the participant will receive intermittent visits  
17  
18 211 from the ward nurse multiple times a day. The ward physician will visit once every day (excl.  
19  
20 212 weekends), with extra visits provided if needed. An emergency alert device, through which nurses  
21  
22 213 and physician can be contacted, will be placed next to the bed. A physiotherapist will visit the  
23  
24 214 participant at the ward to address problems with balance and/or walking and immobility. Depending  
25  
26 215 on the participants' needs, other disciplines (e.g., a dietician, occupational therapist or social  
27  
28 216 services) can be involved in the hospital care. The medical record is the hospital record and  
29  
30 217 additional H@H research forms will be added to this record for research purposes. The participant  
31  
32 218 will be admitted to the hospital for as long as indicated.

### 33 219 34 220 *Hospital discharge*

35 221 If the participant recovers to such an extent that hospital level care is no longer needed, the  
36  
37 222 participant will be discharged from the hospital after discharge planning with the participant, family,  
38  
39 223 physician and nurse. The discharge plan includes follow-up appointments (e.g., at the hospital or  
40  
41 224 general practitioner), information on medication, warning signs and symptoms and an on-going  
42  
43 225 management plan. Arrangements with homecare agencies and/or paramedical staff will be reviewed  
44  
45 226 and adjusted to the current situation.

### 46 227 47 228 **Follow-up**

48 229 At three and six months following randomization, all participants will be contacted for an interview  
49  
50 230 by telephone<sup>34</sup> or a face-to-face interview, if needed. The participants will be allowed to receive  
51  
52 231 support with these questions from their relatives or informal caregivers. An interview will require a  
53  
54 232 maximum of 30 minutes. In case of institutionalization or mortality, this event will be recorded.  
55  
56 233 Additionally, information on hospital readmission and length of stay will be collected from the  
57  
58 234 hospital administration system and health insurers. Mortality and nursing home placements will be  
59  
60 235 collected from registries from the general practitioner and municipalities.

1  
2  
3 2364 237 **Timing of measurements and outcome measures**

5 238

6 239 Data will be collected at baseline at the emergency department, during admission (in Hospital at  
7 240 Home or hospital), at discharge and at three and six months following randomization, plus or minus  
8 241 two weeks. An overview of the timing of measurements and outcome measures are shown in Table  
9 242 2.

10 243

11 244 *Feasibility*

12 245 For the participation rates, the proportion of participants per step will be calculated. The reasons for  
13 246 non-participation and data concerning the characteristics of non-participants will be collected. We  
14 247 consider the participation rate feasible when it is similar to the participation rate as is described in  
15 248 previous RCTs and around 50% of the eligible patients will consent to participate.<sup>32,33</sup> Quality of care  
16 249 will be measured by collecting data on patient, institutionalization (e.g., to the hospital or nursing  
17 250 home), mortality, ADL-functioning, prevalence of hospitalisation-associated geriatric syndromes, the  
18 251 length of stay in the hospital or Hospital at Home care program and contact with health care  
19 252 professionals. The study is considered feasible if the quality of care of Hospital at Home care on these  
20 253 measurements is non- inferior to usual hospital care.

21 254  
22  
23  
24  
25  
26  
27  
28  
29  
30  
31  
32  
33  
34  
35  
36  
37  
38  
39  
40  
41  
42  
43  
44  
45  
46  
47  
48  
49  
50  
51  
52  
53  
54  
55  
56  
57  
58  
59  
60

255 **Table 2** Overview of the content and description of outcome measures and timing of measurements

| Description and instrument                          |                                                                                                                                                                                                 | Timing of measurements |          |       |           |          |          |
|-----------------------------------------------------|-------------------------------------------------------------------------------------------------------------------------------------------------------------------------------------------------|------------------------|----------|-------|-----------|----------|----------|
|                                                     |                                                                                                                                                                                                 | screening              | baseline | daily | discharge | 3 months | 6 months |
| Degree of illness based on physiological parameters | Vital signs alarm score; Modified Early Warning Score, <sup>35</sup>                                                                                                                            | R                      |          |       |           |          |          |
| Cognitive impairment                                | 4AT-test for delirium* Six item cognitive impairment test for cognitive impairment*, <sup>26,36</sup>                                                                                           | R                      |          |       |           |          |          |
| Socio-demographics                                  | Date of birth, nationality, household composition, marital status, highest level of education                                                                                                   |                        | R        |       |           |          |          |
| Health status                                       | Charlson co-morbidity index*, <sup>37</sup>                                                                                                                                                     |                        | R        |       |           |          |          |
| Identifying at-risk patients                        | Safety management system patient screening (VMS), <sup>38</sup>                                                                                                                                 |                        | R        |       |           |          |          |
| Functional status                                   | Activities of daily living, modified Katz-ADL index score, <sup>39</sup>                                                                                                                        |                        | R        |       | R         | R        | R        |
| Health status                                       | EQ-5d-5l*, <sup>40</sup>                                                                                                                                                                        |                        | R        |       | R         | R        | R        |
| (Health-related) quality of life, well-being        | Icepap capability measure for Older people (ICECAP-O)* <sup>41</sup>                                                                                                                            |                        | R        |       | R         | R        | R        |
| Caregiver burden                                    | Self-rated burden scale*, caregiver strain index*, <sup>42,43</sup>                                                                                                                             |                        | C        |       | C         | C        | C        |
| Medical consumption                                 | Imta Medical Consumption Questionnaire (imcq)*, <sup>44</sup>                                                                                                                                   |                        | P,C      |       |           | P,C      | P,C      |
| Hospitalisation-associated geriatric syndromes      | Infections, falls, pressure injuries, in case of delirium; delirium observation scale score (DOSS) <sup>45</sup> and use of physical or chemical restraints, total days with a urinary catheter |                        |          | N     |           |          |          |
| Nutrition                                           | Malnutrition Universal Screening Tool (MUST), <sup>46</sup> food intake, fluid intake                                                                                                           |                        |          | N     |           |          |          |
| Pain                                                | Numeric Rating Scale-score (NRS) for pain <sup>47</sup>                                                                                                                                         |                        |          | N     |           |          |          |
| Health perception                                   | (Rotterdam) symptom checklist* <sup>48</sup>                                                                                                                                                    |                        |          | N     |           |          |          |
| Immobility                                          | Hierarchical assessment of balance and mobility (HABAM) <sup>49</sup>                                                                                                                           |                        |          | Ph    |           |          |          |
| Satisfaction with care                              | Client Satisfaction Questionnaire 8 (CSQ-8)*, care evaluation question*, <sup>50,51</sup>                                                                                                       |                        |          |       | P         | P,C      | N,D      |
| Mortality                                           | Mortality at 30 days, 3 months and 6 months after baseline*                                                                                                                                     |                        |          |       | N         | R        | R        |
| (Re)admission hospital                              | Length of stay, readmission rate at 30 days, 3 months and 6 months after baseline*                                                                                                              |                        |          |       | N         | R        | R        |

256 Assessed by: P= Participant, C=Caregiver, N= Nurse, D= Doctor, R= Research nurse, Ph=Physiotherapist.

257 (\*)= All assessments marked by an asterisk are extra for trial purposes and are not part of the medical treatment

258

259 *Other outcomes measures*

260 Advantages and disadvantages of the Hospital at Home care program will be assessed through  
 261 multiple instruments and questionnaires. The instruments are validated and used in community-  
 262 dwelling older patients with cognitive disorders. Additional data will be collected on the time spent  
 263 at home (home-time); total number of days alive and out of the hospital or a skilled nursing facility in  
 264 the 6 months following the randomization at the emergency department,<sup>52</sup> the number of transfers  
 265 (home ↔ hospital) and the number of health care professionals involved.

1  
2  
3 266 Cost data will be collected, as described by Drummond et al., including the costs to the health care  
4 267 system, patients and families, and other sectors.<sup>53</sup> The volume of care use will be extracted from  
5  
6 268 hospital files and combined with the reference cost values, as provided by the cost guidance module  
7 269 of the Dutch National Health Care Institute.<sup>54</sup>  
8  
9

#### 10 270 **Process evaluation**

11 271 A process evaluation will be conducted as part of the feasibility study to understand the barriers and  
12 272 facilitators to participate and to gain an understanding of the experiences and perceptions of  
13  
14 273 Hospital at Home care of participants and health care professionals. From all eligible patients who  
15 274 declined to participate, data concerning the patient characteristics and reasons for non-participation  
16 275 will be collected. At the end of the trial, a representative sample of participants and/or their informal  
17 276 caregivers will be invited for an interview to evaluate their experiences receiving Hospital at Home  
18 277 care. The interviewer will not be an active member of the research team or involved in day-to-day  
19 278 care and will explore independently how the participants perceived Hospital at Home care, including  
20 279 the contact with the health professionals and the impact of Hospital at Home care on their lives and  
21 280 their caregivers' personal lives. In case of participant dropout, efforts will be made to obtain an  
22 281 understanding of why the participants did not complete the trial.  
23 282 In addition, a representative sample of health care professionals, consisting of physicians and nurses  
24 283 working in the Emergency Department, physicians and nurses providing the Hospital at Home care,  
25 284 and general practitioners, will be asked to participate in a face-to-face interview. The health care  
26 285 professionals will be asked about their experiences and opinions about the H@H-trial and Hospital at  
27 286 Home care. All interviews will be transcribed verbatim, and a framework analysis will be used as the  
28 287 method of qualitative data analysis.<sup>55</sup>  
29  
30  
31  
32  
33  
34  
35  
36  
37  
38  
39

#### 40 288 **Data management**

41  
42  
43 289 All data will be entered in an electronic trial-specific database, with the participants identified by a  
44 290 unique trial number. Confidentiality of participant information will be maintained throughout the  
45 291 trial. Information can only be traced to the participants by designated researchers. The database will  
46 292 be stored and maintained by Castor Electronic Data Capture, compliant with GCP guidelines and the  
47 293 European Data Protection Directive (Castor Electronic Data Capture, Ciwit BV, Amsterdam, the  
48 294 Netherlands, 2017). Data will be stored for a maximum period of 15 years after the study has ended,  
49 295 according to Dutch law.<sup>56</sup>  
50  
51  
52  
53  
54  
55  
56  
57  
58  
59  
60

## 296 **Statistical analysis**

297

298 The participant flow diagram, according to CONSORT guidelines,<sup>57</sup> will provide a summary of the  
299 recruitment and declination rates in percentage (%) at baseline, discharge and three- and six-month  
300 follow-ups. Distributions of the data at baseline, discharge and three and six months after  
301 randomization will be explored, with unusual values noted and explained. Variables will be  
302 summarized as the n (%), mean (standard deviation) or median (interquartile range) for each group,  
303 to characterize the sample and search for any imbalances. The percentages, means and standard  
304 deviation, and medians and interquartile ranges will be calculated to describe the quality of care and  
305 the advantages and disadvantages of Hospital at Home care at baseline, discharge and three- and six-  
306 month follow-ups.

307

## 308 **Monitoring and participant safety**

309

310 Although, the H@H trial is considered to be a low risk trial, the participant safety will be monitored  
311 by an independent Data Monitoring Committee (DMC). The DMC will consist of two members: an  
312 experienced clinician and an epidemiologist. Members of the DMC are independent of the trial and  
313 will discuss each individual participant with serious adverse events. The DMC will receive and review  
314 the serious adverse events and evaluate the risk involved with negative outcomes. The DMC is  
315 authorized to make recommendations to temporary put on hold or ending the study prematurely  
316 when participant safety is an issue, based on their findings. All serious adverse events will be  
317 reported to the principal investigator within 24 hours of knowledge of the event and then  
318 subsequently reported to the Dutch portal for medical research involving human subjects.

## 319 **Discussion**

---

320 Reducing unwanted hospital admissions in older patients with cognitive impairments and facilitating  
321 patient-centred care in a patient's preferred location is a goal worthy of pursuing. This goal aligns  
322 with the tenet of the current Dutch government and the advice provided by the Dutch Council for the  
323 Environment and Infrastructure: to actively promote and enable people to live independently in their  
324 own homes for as long as they desire.<sup>58</sup> Previous trials and a recent review have confirmed that  
325 alternative management strategies for low-risk patients with acute medical conditions conventionally  
326 treated through hospitalization exist with positive impact on patient satisfaction, are effective and  
327 can be safely achieved in lower cost settings.<sup>22,23,59</sup>

1  
2  
3 328 Introducing a Hospital at Home care trajectory in the Netherlands is incited by the principles of value-  
4 329 based health care: improving the patients experience of care and as a result of this process reducing  
5 330 the costs.<sup>60</sup> All countries with an ageing population experience pressure, in terms of shortage of  
6 331 (emergency) hospital beds and rising healthcare costs. Hospital at Home care could be shown  
7 332 beneficial in facilitating higher valued care for patients and their caregivers without additional costs.  
8 333 Benefit should be measured in other outcomes than clinical indicators such as mortality. To illustrate,  
9 334 one of the outcomes of a future RCT could be the time spent at home. Time spent at home has been  
10 335 defined as the total number of days alive and out of the hospital or a skilled nursing facility in the 6  
11 336 months after hospital admission.<sup>52</sup> It has been used as a primary outcome in a follow-up study of  
12 337 older patients with acute hospital admissions, and has been demonstrated to be of more importance  
13 338 in older patients.<sup>61-63</sup> Evaluation of time spent a home in this feasibility study could support  
14 339 estimating a sample size based on a patient-relevant outcome in a future RCT.

15 340 This study will be the first to investigate the feasibility of providing acute hospital care at home for  
16 341 older patients with cognitive impairment in the Netherlands. Studying Hospital at Home care and  
17 342 identifying the barriers and facilitators will support the implementation of Hospital at Home care and  
18 343 break new ground for a future RCT investigating the (cost-)effectiveness.

## 344 **Ethics and Dissemination**

345 This study was approved by the Medical Research Ethics Committee of the University Medical Center  
346 Groningen in April 2017, reference number: 2016.686 The trial will be conducted in accordance with  
347 the Declaration of Helsinki 1996, principles of good clinical practice and the University Medical  
348 Center of Groningen Research Code. Any protocol amendments will be submitted to the ethics  
349 committee. A register of the protocol amendments will be available in the study protocol.

350 The results of the trial will be reported according to the CONSORT guidelines and will contribute to  
351 knowledge of the implementation of Hospital at Home care and patient-centred acute care for older  
352 patients with cognitive impairment. The study will also contribute to the knowledge of the  
353 transmurial cooperation and costs of providing care, in terms of the translocation of hospital care to  
354 home. Regularly updates will be published on the study website and in newsletters. Conferences and  
355 meetings will be held for all involved health care professionals. Participants who requested  
356 information on the study will be sent a lay summary. A publication policy will be agreed upon with  
357 co-applicants. The study findings will be published in relevant peer-reviewed journals.

358  
359

## 360 Authors' affiliations

361 <sup>1</sup> Department of Geriatrics, University Medical Center Groningen, University of Groningen, Groningen, the  
362 Netherlands

363 <sup>2</sup> Department of Internal Medicine, Martini Hospital, Groningen, The Netherlands.

364 <sup>3</sup> Department of Geriatrics, Gelre Hospitals, Apeldoorn, The Netherlands.

365 <sup>4</sup> Department of Internal Medicine, Emergency Department, University Medical Center Groningen, University of  
366 Groningen, Groningen, The Netherlands

367 <sup>5</sup> Department of Epidemiology, University of Groningen, University Medical Center Groningen, Groningen, The  
368 Netherlands.

369

370 **Acknowledgements** The authors would like to thank all care professionals of Alzheimer Nederland, Espria,  
371 Icare, TSN, Buurtzorg, umcGroningen thuis, MCZ, Netwerk Dementie Groningen, Netwerk Dementie Drenthe,  
372 Gemeente Groningen, WIJ Groningen, Zorgbelang, Healthy Aging Network Northern Netherlands, Stichting  
373 Effectieve Ouderenzorg, ZonMW, Deltaplan Dementie, Nationaal Programma Ouderenzorg, Zorg innovatie  
374 Forum and the elderly of Denktank 60+ Noord for their time, critical appraisal and advise.

375

376 **Contributors** MP drafted the manuscript. All authors were involved in making substantial contributions to the  
377 conception and design of the protocol and the critical revision of the manuscript for publication. All authors  
378 approved the final version to be published.

379

380 **Funding** This study is independent research funded by ZonMw (project Memorabel, Deltaplan Dementie),  
381 project number #733050401 (contact: memorabel@zonmw.nl). Additional funding is provided by the Dutch  
382 Ministry of Health, Welfare and Sport (Ministerie van Volksgezondheid, Welzijn en Sport) and the University  
383 Medical Center Groningen.

384

385 **Disclaimer** The views and opinions expressed in this paper are those of the authors and not necessarily those  
386 of the UMCG, Memorabel, Deltaplan Dementie or ZonMW.

387

388 **Competing interests** All authors have declared that they have no competing interests

389

390 **Ethics approval** for this study has been obtained from the Medical Research Ethics Committee of the University  
391 Medical Center Groningen April 2017 (ref: 2016.686).

392

393 **Recruitment status** is pending; participants are not yet being recruited or enrolled. Anticipated date of  
394 enrolment of the first participant is December 2017.

395

396 **Corresponding author:** m.a.pouw@umcg.nl. University Center of Geriatric Medicine, University Medical Center  
397 Groningen. Hanzeplein 1, Postbus 30 001, 9700 RB Groningen

398

399 **Scientific inquiries:** prof Sophia E.de Rooij, s.e.j.a.de.rooij@umcg.nl, telephone number 050-3613921,  
400 Hanzeplein 1, Postbus 30 001, 9700 RB Groningen. University of Groningen, University Medical Center  
401 Groningen, University Center for Geriatric Medicine, Groningen, The Netherlands.

402 Generic email address [hospitalathome@umcg.nl](mailto:hospitalathome@umcg.nl).

403

## 404 Abbreviations

405 ADL: Activities of Daily Living

406 CT: Computer Tomography

407 DMC: Data Monitoring Committee

408 ED: Emergency Department

409 H@H: Hospital at Home

410 RCT: Randomized Controlled Trial

411 UMCG: University Medical Center Groningen

## 412 References

413 (1) Krumholz HM. Post-Hospital Syndrome - A Condition of Generalized Risk. N Engl J Med 2013  
414 01/10;368(2):100-102.



- 415 (2) Missildine K, Bergstrom N, Meininger J, Richards K, Foreman MD. Sleep in Hospitalized Elders: A Pilot Study.  
416 *Geriatr Nurs* 2010 0;31(4):263-271.
- 417 (3) Brown CJ, Redden DT, Flood KL, Allman RM. The underrecognized epidemic of low mobility during  
418 hospitalization of older adults. *J Am Geriatr Soc* 2009 Sep;57(9):1660-1665.
- 419 (4) Sullivan DH, Sun S, Walls RC. Protein-energy undernutrition among elderly hospitalized patients: a  
420 prospective study. *JAMA* 1999 Jun 2;281(21):2013-2019.
- 421 (5) Creditor MC. Hazards of hospitalization of the elderly. *Ann Intern Med* 1993;118(3):219-223.
- 422 (6) Inouye SK, Studenski S, Tinetti ME, Kuchel GA. Geriatric Syndromes: Clinical, Research, and Policy  
423 Implications of a Core Geriatric Concept. *J Am Geriatr Soc* 2007;55(5):780-791.
- 424 (7) Mudge AM, Banks MD, Barnett AG, Blackberry I, Graves N, Green T, et al. CHERISH (collaboration for  
425 hospitalised elders reducing the impact of stays in hospital): protocol for a multi-site improvement program to  
426 reduce geriatric syndromes in older inpatients. *BMC Geriatrics* 2017;17(1):11.
- 427 (8) Covinsky KE, Pierluissi E, Johnston CB. Hospitalization-associated disability: "She was probably able to  
428 ambulate, but I'm not sure". *JAMA* 2011 Oct 26;306(16):1782-1793.
- 429 (9) Zisberg A, Shadmi E, Gur-Yaish N, Tonkikh O, Sinoff G. Hospital-associated functional decline: the role of  
430 hospitalization processes beyond individual risk factors. *J Am Geriatr Soc* 2015 Jan;63(1):55-62.
- 431 (10) Fried LP, Tangen CM, Walston J, Newman AB, Hirsch C, Gottdiener J, et al. Frailty in older adults: evidence  
432 for a phenotype. *J Gerontol A Biol Sci Med Sci* 2001 Mar;56(3):M146-56.
- 433 (11) Clegg A, Young J, Iliffe S, Rikkert MO, Rockwood K. Frailty in elderly people. *The Lancet* 2013 3/2-  
434 8;381(9868):752-762.
- 435 (12) Ferrucci L, Guralnik JM, Studenski S, Fried LP, Cutler GB, Walston JD, et al. Designing Randomized,  
436 Controlled Trials Aimed at Preventing or Delaying Functional Decline and Disability in Frail, Older Persons: A  
437 Consensus Report. *J Am Geriatr Soc* 2004;52(4):625-634.
- 438 (13) Glover A, Bradshaw LE, Watson N, Laithwaite E, Goldberg SE, Whittamore KH, et al. Diagnoses, problems  
439 and healthcare interventions amongst older people with an unscheduled hospital admission who have  
440 concurrent mental health problems: a prevalence study. *BMC geriatrics* 2014;14(1):1.
- 441 (14) Pinkert C, Holle B. People with dementia in acute hospitals. Literature review of prevalence and reasons  
442 for hospital admission. *Z Gerontol Geriatr* 2012 Dec;45(8):728-734.
- 443 (15) Mukadam N, Sampson EL. A systematic review of the prevalence, associations and outcomes of dementia  
444 in older general hospital inpatients. *International Psychogeriatrics* 2011;23(03):344-355.
- 445 (16) Timmons S, Manning E, Barrett A, Brady NM, Browne V, O'Shea E, et al. Dementia in older people admitted  
446 to hospital: a regional multi-hospital observational study of prevalence, associations and case recognition. *Age*  
447 *Ageing* 2015 Nov;44(6):993-999.
- 448 (17) Bradshaw LE, Goldberg SE, Lewis SA, Whittamore K, Gladman JRF, Jones RG, et al. Six-month outcomes  
449 following an emergency hospital admission for older adults with co-morbid mental health problems indicate  
450 complexity of care needs. *Age and Ageing* 2013 September 01;42(5):582-588.
- 451 (18) Satizabal CL, Beiser AS, Chouraki V, Chêne G, Dufouil C, Seshadri S. Incidence of Dementia over Three  
452 Decades in the Framingham Heart Study. *N Engl J Med* 2016 02/11; 2016/02;374(6):523-532.
- 453 (19) World Health Organization. Dementia Fact sheet. April 2016; Available at:  
454 <http://www.who.int/mediacentre/factsheets/fs362/en/>. Accessed January 25, 2017.
- 455 (20) Fried TR, van Doorn C, O'Leary JR, Tinetti ME, Drickamer MA. Older persons' preferences for home vs  
456 hospital care in the treatment of acute illness. *Arch Intern Med* 2000;160(10):1501-1506.
- 457 (21) Fried TR, Bradley EH, Towle VR, Allore H. Understanding the Treatment Preferences of Seriously Ill  
458 Patients. *N Engl J Med* 2002 04/04; 2017/05;346(14):1061-1066.
- 459 (22) Shepperd S, Iliffe S, Doll HA, Clarke MJ, Kalra L, Wilson AD, et al. Admission avoidance hospital at home.  
460 *The Cochrane Library* 2016.
- 461 (23) Conley J, O'Brien CW, Leff BA, Bolen S, Zulman D. Alternative strategies to inpatient hospitalization for  
462 acute medical conditions: A systematic review. *JAMA Internal Medicine* 2016 November 1;176(11):1693-1702.
- 463 (24) Tibaldi V, Aimonino N, Ponzetto M, Stasi M, Amati D, Raspo S, et al. A randomized controlled trial of a  
464 home hospital intervention for frail elderly demented patients: behavioral disturbances and caregiver's stress.  
465 *Arch Gerontol Geriatr* 2004;38:431-436.
- 466 (25) Chan AW, Tetzlaff JM, Altman DG, Laupacis A, Gotzsche PC, Krleza-Jeric K, et al. SPIRIT 2013 statement:  
467 defining standard protocol items for clinical trials. *Ann Intern Med* 2013 Feb 5;158(3):200-207.
- 468 (26) Bellelli G, Morandi A, Davis DHJ, Mazzola P, Turco R, Gentile S, et al. Validation of the 4AT, a new  
469 instrument for rapid delirium screening: a study in 234 hospitalised older people. *Age and Ageing* 2014 March  
470 02.

- 1  
2  
3 471 (27) Katzman R, Brown T, Fuld P, Peck A, Schechter R, Schimmel H. Validation of a short Orientation-Memory-  
4 472 Concentration Test of cognitive impairment. *Am J Psychiatry* 1983 Jun;140(6):734-739.
- 5 473 (28) Shepperd S, Harwood D, Jenkinson C, Gray A, Vessey M, Morgan P. Randomised controlled trial comparing  
6 474 hospital at home care with inpatient hospital care. I: three month follow up of health outcomes. *BMJ* 1998 Jun  
7 475 13;316(7147):1786-1791.
- 8 476 (29) Cei M, Bartolomei C, Mumoli N. In-hospital mortality and morbidity of elderly medical patients can be  
9 477 predicted at admission by the Modified Early Warning Score: a prospective study. *Int J Clin Pract*  
10 478 2009;63(4):591-595.
- 11 479 (30) Dundar ZD, Ergin M, Karamercan MA, Ayranci K, Colak T, Tunçar A, et al. Modified Early Warning Score and  
12 480 VitalPac Early Warning Score in geriatric patients admitted to emergency department. *Eur J Emerg Med* 2015.
- 13 481 (31) Ridley S. The recognition and early management of critical illness. *Ann R Coll Surg Engl* 2005 Sep;87(5):315-  
14 482 322.
- 15 483 (32) Aimonino Ricauda N, Tibaldi V, Leff B, Scarafiotti C, Marinello R, Zanochi M, et al. Substitutive "hospital at  
16 484 home" versus inpatient care for elderly patients with exacerbations of chronic obstructive pulmonary disease:  
17 485 a prospective randomized, controlled trial. *J Am Geriatr Soc* 2008;56(3):493-500.
- 18 486 (33) Tibaldi V, Isaia G, Scarafiotti C, Gariglio F, Zanochi M, Bo M, et al. Hospital at home for elderly patients  
19 487 with acute decompensation of chronic heart failure: a prospective randomized controlled trial. *Arch Intern Med*  
20 488 2009;169(17):1569-1575.
- 21 489 (34) Worth A, Tierney AJ. Conducting research interviews with elderly people by telephone. *J Adv Nurs*  
22 490 1993;18(7):1077-1084.
- 23 491 (35) Subbe CP, Kruger M, Rutherford P, Gemmel L. Validation of a modified Early Warning Score in medical  
24 492 admissions. *QJM* 2001 Oct;94(10):521-526.
- 25 493 (36) American College of Emergency Physicians, American Geriatrics Society, Emergency Nurses Association,  
26 494 Society for Academic Emergency Medicine, Geriatric Emergency Department Guidelines Task Force. Geriatric  
27 495 emergency department guidelines. *Ann Emerg Med* 2014 May;63(5):e7-25.
- 28 496 (37) Charlson ME, Pompei P, Ales KL, MacKenzie CR. A new method of classifying prognostic comorbidity in  
29 497 longitudinal studies: development and validation. *J Chronic Dis* 1987;40(5):373-383.
- 30 498 (38) Oud F, de Rooij S, Schuurman T, Duijvelaar K, van Munster B. [Predictive value of the VMS theme 'Frail  
31 499 elderly': delirium, falling and mortality in elderly hospital patients]. *Ned Tijdschr Geneesk* 2014;159:A8491-  
500 A8491.
- 32 501 (39) Katz S, Ford AB, Moskowitz RW, Jackson BA, Jaffe MW. Studies of illness in the aged: the index of ADL: a  
33 502 standardized measure of biological and psychosocial function. *JAMA* 1963;185(12):914-919.
- 34 503 (40) Herdman M, Gudex C, Lloyd A, Janssen M, Kind P, Parkin D, et al. Development and preliminary testing of  
35 504 the new five-level version of EQ-5D (EQ-5D-5L). *Quality of Life Research* 2011;20(10):1727-1736.
- 36 505 (41) Makai P, Brouwer WBF, Koopmanschap MA, Nieboer AP. Capabilities and quality of life in Dutch psycho-  
37 506 geriatric nursing homes: an exploratory study using a proxy version of the ICECAP-O. *Quality of Life Research*  
38 507 2012;21(5):801-812.
- 39 508 (42) van Exel NJ, Scholte op Reimer WJ, Brouwer WB, van den Berg B, Koopmanschap MA, van den Bos GA.  
40 509 Instruments for assessing the burden of informal caregiving for stroke patients in clinical practice: a  
41 510 comparison of CSI, CRA, SCQ and self-rated burden. *Clin Rehabil* 2004 Mar;18(2):203-214.
- 42 511 (43) Robinson BC. Validation of a Caregiver Strain Index. *Journal of Gerontology* 1983 May 01;38(3):344-348.
- 43 512 (44) Bouwmans C, Hakkaart-van Roijen L, Koopmanschap M, Krol M, Severens H, Brouwer W. Handleiding iMTA  
44 513 Medical Cost Questionnaire (iMCQ). Rotterdam: iMTA, Erasmus Universiteit Rotterdam, 2013.
- 45 514 (45) Gavinski K, Carnahan R, Weckmann M. Validation of the delirium observation screening scale in a  
46 515 hospitalized older population. *Journal of Hospital Medicine* 2016:n/a-n/a.
- 47 516 (46) Stratton RJ, Hackston A, Longmore D, Dixon R, Price S, Stroud M, et al. Malnutrition in hospital outpatients  
48 517 and inpatients: prevalence, concurrent validity and ease of use of the 'malnutrition universal screening  
49 518 tool' ('MUST') for adults. *Br J Nutr* 2004;92(05):799-808.
- 50 519 (47) Hawker GA, Mian S, Kendzerska T, French M. Measures of adult pain: Visual Analog Scale for Pain (VAS  
51 520 Pain), Numeric Rating Scale for Pain (NRS Pain), McGill Pain Questionnaire (MPQ), Short-Form McGill Pain  
52 521 Questionnaire (SF-MPQ), Chronic Pain Grade Scale (CPGS), Short Form-36 Bodily Pain Scale (SF-36 BPS), and  
52 522 Measure of Intermittent and Constant Osteoarthritis Pain (ICOAP). *Arthritis Care & Research*  
53 523 2011;63(S11):S240-S252.
- 54 524 (48) de Haes, J.C., van Knippenberg, F.C., Neijt JP. Measuring psychological and physical distress in cancer  
55 525 patients: structure and application of the Rotterdam Symptom Checklist. *Br J Cancer* 1990 12;62(6):1034-1038.
- 56 526 (49) MacKnight C, Rockwood K. A Hierarchical Assessment of Balance and Mobility. *Age Ageing* 1995  
57 527 Mar;24(2):126-130.

- 1  
2  
3 528 (50) Attkisson CC, Greenfield TK. The UCSF Client Satisfaction Scales: I. The Client Satisfaction Questionnaire-8.  
4 529 1999.  
5 530 (51) Reichheld FF. The one number you need to grow. *Harv Bus Rev* 2003;81(12):46-55.  
6 531 (52) Quinn TJ, Dawson J, Lees JS, Chang T, Walters MR, Lees KR, et al. Time Spent at Home Poststroke: "Home-  
7 532 Time" a Meaningful and Robust Outcome Measure for Stroke Trials. *Stroke* 2008 January 01;39(1):231-233.  
8 533 (53) Drummond MF, Sculpher MJ, Claxton K, Stoddart GL, Torrance GW. *Methods for the economic evaluation*  
9 534 *of health care programmes*. : Oxford university press; 2015.  
10 535 (54) Hakkaart-van Roijen L, Van der Linden N, Bouwmans C, Kanters T, Tan S. *Kostenhandleiding. Methodologie*  
11 536 *van kostenonderzoek en referentieprijzen voor economische evaluaties in de gezondheidszorg. In opdracht van*  
12 537 *Zorginstituut Nederland. Geactualiseerde versie 2015.*  
13 538 (55) Ritchie J, Spencer L. *Qualitative data analysis for applied policy research. The qualitative researcher's*  
14 539 *companion* 2002;573(2002):305-329.  
15 540 (56) Wet bescherming persoonsgegevens (2000, July 6). Available at:  
16 541 <http://wetten.overheid.nl/BWBR0011468/2017-07-01/0/>. Accessed October 25, 2017.  
17 542 (57) Schulz KF, Altman DG, Moher D. CONSORT 2010 Statement: updated guidelines for reporting parallel  
18 543 group randomised trials. *Trials* 2010;11(1):32.  
19 544 (58) Raad voor de leefomgeving en infrastructuur. *Langer zelfstandig, een gedeelde opgave van wonen, zorg en*  
20 545 *welzijn. Advies van de Raad voor de Leefomgeving en infrastructuur over langer zelfstandig wonen.* (2014,  
21 546 January 15) Available at: [http://www.rli.nl/sites/default/files/rli-](http://www.rli.nl/sites/default/files/rli-briefadvieslangerzelfstandigeengedeeldeopgavevanwonenzorgenwelzijndef23-113-30_0.pdf)  
22 547 [briefadvieslangerzelfstandigeengedeeldeopgavevanwonenzorgenwelzijndef23-113-30\\_0.pdf](http://www.rli.nl/sites/default/files/rli-briefadvieslangerzelfstandigeengedeeldeopgavevanwonenzorgenwelzijndef23-113-30_0.pdf). Accessed October  
23 548 25, 2017  
24 549 (59) Caplan GA, Sulaiman NS, Mangin DA, Aimonino Ricauda N, Wilson AD, Barclay L. A meta-analysis of  
25 550 "hospital in the home". *Med J Aust* 2012 Nov 5;197(9):512-519.  
26 551 (60) Porter ME. What Is Value in Health Care? *N Engl J Med* 2010 12/23; 2016/06;363(26):2477-2481.  
27 552 (61) Bradshaw LE, Goldberg SE, Lewis SA, Whittamore K, Gladman J, Jones R, et al. Six-month outcomes  
28 553 following an emergency hospital admission for older adults with co-morbid mental health problems indicate  
29 554 complexity of care needs. *Age Ageing* 2013;42(5):582-588.  
30 555 (62) Sayer C. "Time Spent at Home" — A Patient-Defined Outcome. *NEJM Catalyst*. 2016.  
31 556 (63) Groff AC, Colla CH, Lee TH. Days Spent at Home — A Patient-Centered Goal and Outcome. *N Engl J Med*  
32 557 2016 10/27; 2017/01;375(17):1610-1612.

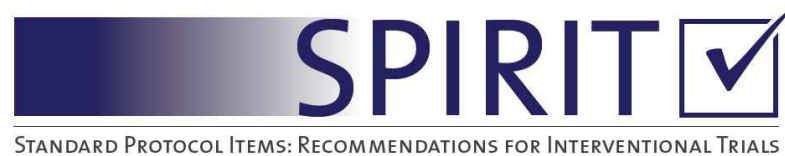

SPIRIT 2013 Checklist: Recommended items to address in a clinical trial protocol and related documents\*

| Section/item                      | Item No | Description                                                                                                                                                                                                                                                                              | Addressed on page number    |
|-----------------------------------|---------|------------------------------------------------------------------------------------------------------------------------------------------------------------------------------------------------------------------------------------------------------------------------------------------|-----------------------------|
| <b>Administrative information</b> |         |                                                                                                                                                                                                                                                                                          |                             |
| Title                             | 1       | Descriptive title identifying the study design, population, interventions, and, if applicable, trial acronym                                                                                                                                                                             | 1                           |
| Trial registration                | 2a      | Trial identifier and registry name. If not yet registered, name of intended registry                                                                                                                                                                                                     | 1                           |
|                                   | 2b      | All items from the World Health Organization Trial Registration Data Set                                                                                                                                                                                                                 | 1, 3, 4, 5, 6, 8, 9, 13, 14 |
| Protocol version                  | 3       | Date and version identifier                                                                                                                                                                                                                                                              | all                         |
| Funding                           | 4       | Sources and types of financial, material, and other support                                                                                                                                                                                                                              | 14                          |
| Roles and responsibilities        | 5a      | Names, affiliations, and roles of protocol contributors                                                                                                                                                                                                                                  | 14                          |
|                                   | 5b      | Name and contact information for the trial sponsor                                                                                                                                                                                                                                       | 14                          |
|                                   | 5c      | Role of study sponsor and funders, if any, in study design; collection, management, analysis, and interpretation of data; writing of the report; and the decision to submit the report for publication, including whether they will have ultimate authority over any of these activities | 14                          |
|                                   | 5d      | Composition, roles, and responsibilities of the coordinating centre, steering committee, endpoint adjudication committee, data management team, and other individuals or groups overseeing the trial, if applicable (see Item 21a for data monitoring committee)                         | n/a                         |

1  
2  
3  
4  
5  
6  
7  
8  
9  
10  
11  
12  
13  
14  
15  
16  
17  
18  
19  
20  
21  
22  
23  
24  
25  
26  
27  
28  
29  
30  
31  
32  
33  
34  
35  
36  
37  
38  
39  
40  
41  
42  
43  
44  
45  
46  
47**Introduction**

|                          |    |                                                                                                                                                                                                           |   |
|--------------------------|----|-----------------------------------------------------------------------------------------------------------------------------------------------------------------------------------------------------------|---|
| Background and rationale | 6a | Description of research question and justification for undertaking the trial, including summary of relevant studies (published and unpublished) examining benefits and harms for each intervention        | 3 |
|                          | 6b | Explanation for choice of comparators                                                                                                                                                                     | 3 |
| Objectives               | 7  | Specific objectives or hypotheses                                                                                                                                                                         | 3 |
| Trial design             | 8  | Description of trial design including type of trial (eg, parallel group, crossover, factorial, single group), allocation ratio, and framework (eg, superiority, equivalence, noninferiority, exploratory) | 4 |

**Methods: Participants, interventions, and outcomes**

|                      |     |                                                                                                                                                                                                                                                                                                                                                                                |       |
|----------------------|-----|--------------------------------------------------------------------------------------------------------------------------------------------------------------------------------------------------------------------------------------------------------------------------------------------------------------------------------------------------------------------------------|-------|
| Study setting        | 9   | Description of study settings (eg, community clinic, academic hospital) and list of countries where data will be collected. Reference to where list of study sites can be obtained                                                                                                                                                                                             | 4     |
| Eligibility criteria | 10  | Inclusion and exclusion criteria for participants. If applicable, eligibility criteria for study centres and individuals who will perform the interventions (eg, surgeons, psychotherapists)                                                                                                                                                                                   | 6     |
| Interventions        | 11a | Interventions for each group with sufficient detail to allow replication, including how and when they will be administered                                                                                                                                                                                                                                                     | 7, 8  |
|                      | 11b | Criteria for discontinuing or modifying allocated interventions for a given trial participant (eg, drug dose change in response to harms, participant request, or improving/worsening disease)                                                                                                                                                                                 | 7, 8  |
|                      | 11c | Strategies to improve adherence to intervention protocols, and any procedures for monitoring adherence (eg, drug tablet return, laboratory tests)                                                                                                                                                                                                                              | n/a   |
|                      | 11d | Relevant concomitant care and interventions that are permitted or prohibited during the trial                                                                                                                                                                                                                                                                                  | 9, 10 |
| Outcomes             | 12  | Primary, secondary, and other outcomes, including the specific measurement variable (eg, systolic blood pressure), analysis metric (eg, change from baseline, final value, time to event), method of aggregation (eg, median, proportion), and time point for each outcome. Explanation of the clinical relevance of chosen efficacy and harm outcomes is strongly recommended | 9, 10 |
| Participant timeline | 13  | Time schedule of enrolment, interventions (including any run-ins and washouts), assessments, and visits for participants. A schematic diagram is highly recommended (see Figure)                                                                                                                                                                                               | 10    |

|   |             |    |                                                                                                                                                                                       |   |
|---|-------------|----|---------------------------------------------------------------------------------------------------------------------------------------------------------------------------------------|---|
| 1 |             |    |                                                                                                                                                                                       |   |
| 2 |             |    |                                                                                                                                                                                       |   |
| 3 | Sample size | 14 | Estimated number of participants needed to achieve study objectives and how it was determined, including clinical and statistical assumptions supporting any sample size calculations | 6 |
| 4 |             |    |                                                                                                                                                                                       |   |
| 5 | Recruitment | 15 | Strategies for achieving adequate participant enrolment to reach target sample size                                                                                                   | 5 |
| 6 |             |    |                                                                                                                                                                                       |   |
| 7 |             |    |                                                                                                                                                                                       |   |

## 8 **Methods: Assignment of interventions (for controlled trials)**

### 9 Allocation:

|    |                                  |     |                                                                                                                                                                                                                                                                                                                                                          |     |
|----|----------------------------------|-----|----------------------------------------------------------------------------------------------------------------------------------------------------------------------------------------------------------------------------------------------------------------------------------------------------------------------------------------------------------|-----|
| 10 |                                  |     |                                                                                                                                                                                                                                                                                                                                                          |     |
| 11 |                                  |     |                                                                                                                                                                                                                                                                                                                                                          |     |
| 12 | Sequence generation              | 16a | Method of generating the allocation sequence (eg, computer-generated random numbers), and list of any factors for stratification. To reduce predictability of a random sequence, details of any planned restriction (eg, blocking) should be provided in a separate document that is unavailable to those who enrol participants or assign interventions | 4   |
| 13 |                                  |     |                                                                                                                                                                                                                                                                                                                                                          |     |
| 14 |                                  |     |                                                                                                                                                                                                                                                                                                                                                          |     |
| 15 |                                  |     |                                                                                                                                                                                                                                                                                                                                                          |     |
| 16 |                                  |     |                                                                                                                                                                                                                                                                                                                                                          |     |
| 17 | Allocation concealment mechanism | 16b | Mechanism of implementing the allocation sequence (eg, central telephone; sequentially numbered, opaque, sealed envelopes), describing any steps to conceal the sequence until interventions are assigned                                                                                                                                                | 4   |
| 18 |                                  |     |                                                                                                                                                                                                                                                                                                                                                          |     |
| 19 |                                  |     |                                                                                                                                                                                                                                                                                                                                                          |     |
| 20 |                                  |     |                                                                                                                                                                                                                                                                                                                                                          |     |
| 21 | Implementation                   | 16c | Who will generate the allocation sequence, who will enrol participants, and who will assign participants to interventions                                                                                                                                                                                                                                | 4   |
| 22 |                                  |     |                                                                                                                                                                                                                                                                                                                                                          |     |
| 23 |                                  |     |                                                                                                                                                                                                                                                                                                                                                          |     |
| 24 | Blinding (masking)               | 17a | Who will be blinded after assignment to interventions (eg, trial participants, care providers, outcome assessors, data analysts), and how                                                                                                                                                                                                                | 4   |
| 25 |                                  |     |                                                                                                                                                                                                                                                                                                                                                          |     |
| 26 |                                  |     |                                                                                                                                                                                                                                                                                                                                                          |     |
| 27 |                                  | 17b | If blinded, circumstances under which unblinding is permissible, and procedure for revealing a participant's allocated intervention during the trial                                                                                                                                                                                                     | n/a |
| 28 |                                  |     |                                                                                                                                                                                                                                                                                                                                                          |     |
| 29 |                                  |     |                                                                                                                                                                                                                                                                                                                                                          |     |
| 30 |                                  |     |                                                                                                                                                                                                                                                                                                                                                          |     |

## 31 **Methods: Data collection, management, and analysis**

|    |                         |     |                                                                                                                                                                                                                                                                                                                                                                                                              |           |
|----|-------------------------|-----|--------------------------------------------------------------------------------------------------------------------------------------------------------------------------------------------------------------------------------------------------------------------------------------------------------------------------------------------------------------------------------------------------------------|-----------|
| 32 |                         |     |                                                                                                                                                                                                                                                                                                                                                                                                              |           |
| 33 | Data collection methods | 18a | Plans for assessment and collection of outcome, baseline, and other trial data, including any related processes to promote data quality (eg, duplicate measurements, training of assessors) and a description of study instruments (eg, questionnaires, laboratory tests) along with their reliability and validity, if known. Reference to where data collection forms can be found, if not in the protocol | 9, 10, 11 |
| 34 |                         |     |                                                                                                                                                                                                                                                                                                                                                                                                              |           |
| 35 |                         |     |                                                                                                                                                                                                                                                                                                                                                                                                              |           |
| 36 |                         |     |                                                                                                                                                                                                                                                                                                                                                                                                              |           |
| 37 |                         |     |                                                                                                                                                                                                                                                                                                                                                                                                              |           |
| 38 |                         | 18b | Plans to promote participant retention and complete follow-up, including list of any outcome data to be collected for participants who discontinue or deviate from intervention protocols                                                                                                                                                                                                                    | 11        |
| 39 |                         |     |                                                                                                                                                                                                                                                                                                                                                                                                              |           |
| 40 |                         |     |                                                                                                                                                                                                                                                                                                                                                                                                              |           |
| 41 |                         |     |                                                                                                                                                                                                                                                                                                                                                                                                              |           |
| 42 |                         |     |                                                                                                                                                                                                                                                                                                                                                                                                              |           |
| 43 |                         |     |                                                                                                                                                                                                                                                                                                                                                                                                              |           |
| 44 |                         |     |                                                                                                                                                                                                                                                                                                                                                                                                              |           |
| 45 |                         |     |                                                                                                                                                                                                                                                                                                                                                                                                              |           |
| 46 |                         |     |                                                                                                                                                                                                                                                                                                                                                                                                              |           |
| 47 |                         |     |                                                                                                                                                                                                                                                                                                                                                                                                              |           |

1  
2  
3  
4  
5  
6  
7  
8  
9  
10  
11  
12  
13  
14  
15  
16  
17  
18  
19  
20  
21  
22  
23  
24  
25  
26  
27  
28  
29  
30  
31  
32  
33  
34  
35  
36  
37  
38  
39  
40  
41  
42  
43  
44  
45  
46  
47

|                     |     |                                                                                                                                                                                                                                                                   |     |
|---------------------|-----|-------------------------------------------------------------------------------------------------------------------------------------------------------------------------------------------------------------------------------------------------------------------|-----|
| Data management     | 19  | Plans for data entry, coding, security, and storage, including any related processes to promote data quality (eg, double data entry; range checks for data values). Reference to where details of data management procedures can be found, if not in the protocol | 11  |
| Statistical methods | 20a | Statistical methods for analysing primary and secondary outcomes. Reference to where other details of the statistical analysis plan can be found, if not in the protocol                                                                                          | 12  |
|                     | 20b | Methods for any additional analyses (eg, subgroup and adjusted analyses)                                                                                                                                                                                          | n/a |
|                     | 20c | Definition of analysis population relating to protocol non-adherence (eg, as randomised analysis), and any statistical methods to handle missing data (eg, multiple imputation)                                                                                   | n/a |

**Methods: Monitoring**

|                 |     |                                                                                                                                                                                                                                                                                                                                       |     |
|-----------------|-----|---------------------------------------------------------------------------------------------------------------------------------------------------------------------------------------------------------------------------------------------------------------------------------------------------------------------------------------|-----|
| Data monitoring | 21a | Composition of data monitoring committee (DMC); summary of its role and reporting structure; statement of whether it is independent from the sponsor and competing interests; and reference to where further details about its charter can be found, if not in the protocol. Alternatively, an explanation of why a DMC is not needed | 12  |
|                 | 21b | Description of any interim analyses and stopping guidelines, including who will have access to these interim results and make the final decision to terminate the trial                                                                                                                                                               | 12  |
| Harms           | 22  | Plans for collecting, assessing, reporting, and managing solicited and spontaneously reported adverse events and other unintended effects of trial interventions or trial conduct                                                                                                                                                     | 12  |
| Auditing        | 23  | Frequency and procedures for auditing trial conduct, if any, and whether the process will be independent from investigators and the sponsor                                                                                                                                                                                           | n/a |

**Ethics and dissemination**

|                          |    |                                                                                                                                                                                                                                  |    |
|--------------------------|----|----------------------------------------------------------------------------------------------------------------------------------------------------------------------------------------------------------------------------------|----|
| Research ethics approval | 24 | Plans for seeking research ethics committee/institutional review board (REC/IRB) approval                                                                                                                                        | 12 |
| Protocol amendments      | 25 | Plans for communicating important protocol modifications (eg, changes to eligibility criteria, outcomes, analyses) to relevant parties (eg, investigators, REC/IRBs, trial participants, trial registries, journals, regulators) | 12 |

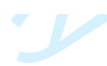

|    |                               |     |                                                                                                                                                                                                                                                                                     |                      |
|----|-------------------------------|-----|-------------------------------------------------------------------------------------------------------------------------------------------------------------------------------------------------------------------------------------------------------------------------------------|----------------------|
| 1  |                               |     |                                                                                                                                                                                                                                                                                     |                      |
| 2  |                               |     |                                                                                                                                                                                                                                                                                     |                      |
| 3  | Consent or assent             | 26a | Who will obtain informed consent or assent from potential trial participants or authorised surrogates, and how (see Item 32)                                                                                                                                                        | 5                    |
| 4  |                               |     |                                                                                                                                                                                                                                                                                     |                      |
| 5  |                               |     |                                                                                                                                                                                                                                                                                     |                      |
| 6  |                               | 26b | Additional consent provisions for collection and use of participant data and biological specimens in ancillary studies, if applicable                                                                                                                                               | n/a                  |
| 7  |                               |     |                                                                                                                                                                                                                                                                                     |                      |
| 8  |                               |     |                                                                                                                                                                                                                                                                                     |                      |
| 9  | Confidentiality               | 27  | How personal information about potential and enrolled participants will be collected, shared, and maintained in order to protect confidentiality before, during, and after the trial                                                                                                | 10                   |
| 10 |                               |     |                                                                                                                                                                                                                                                                                     |                      |
| 11 | Declaration of interests      | 28  | Financial and other competing interests for principal investigators for the overall trial and each study site                                                                                                                                                                       | 13                   |
| 12 |                               |     |                                                                                                                                                                                                                                                                                     |                      |
| 13 |                               |     |                                                                                                                                                                                                                                                                                     |                      |
| 14 | Access to data                | 29  | Statement of who will have access to the final trial dataset, and disclosure of contractual agreements that limit such access for investigators                                                                                                                                     | 10                   |
| 15 |                               |     |                                                                                                                                                                                                                                                                                     |                      |
| 16 |                               |     |                                                                                                                                                                                                                                                                                     |                      |
| 17 | Ancillary and post-trial care | 30  | Provisions, if any, for ancillary and post-trial care, and for compensation to those who suffer harm from trial participation                                                                                                                                                       | Available on request |
| 18 |                               |     |                                                                                                                                                                                                                                                                                     |                      |
| 19 |                               |     |                                                                                                                                                                                                                                                                                     |                      |
| 20 | Dissemination policy          | 31a | Plans for investigators and sponsor to communicate trial results to participants, healthcare professionals, the public, and other relevant groups (eg, via publication, reporting in results databases, or other data sharing arrangements), including any publication restrictions | 12                   |
| 21 |                               |     |                                                                                                                                                                                                                                                                                     |                      |
| 22 |                               |     |                                                                                                                                                                                                                                                                                     |                      |
| 23 |                               |     |                                                                                                                                                                                                                                                                                     |                      |
| 24 |                               |     |                                                                                                                                                                                                                                                                                     |                      |
| 25 |                               | 31b | Authorship eligibility guidelines and any intended use of professional writers                                                                                                                                                                                                      | 13                   |
| 26 |                               |     |                                                                                                                                                                                                                                                                                     |                      |
| 27 |                               | 31c | Plans, if any, for granting public access to the full protocol, participant-level dataset, and statistical code                                                                                                                                                                     | n/a                  |
| 28 |                               |     |                                                                                                                                                                                                                                                                                     |                      |
| 29 | <b>Appendices</b>             |     |                                                                                                                                                                                                                                                                                     |                      |
| 30 |                               |     |                                                                                                                                                                                                                                                                                     |                      |
| 31 | Informed consent materials    | 32  | Model consent form and other related documentation given to participants and authorised surrogates                                                                                                                                                                                  | Available on request |
| 32 |                               |     |                                                                                                                                                                                                                                                                                     |                      |
| 33 |                               |     |                                                                                                                                                                                                                                                                                     |                      |
| 34 | Biological specimens          | 33  | Plans for collection, laboratory evaluation, and storage of biological specimens for genetic or molecular analysis in the current trial and for future use in ancillary studies, if applicable                                                                                      | n/a                  |
| 35 |                               |     |                                                                                                                                                                                                                                                                                     |                      |
| 36 |                               |     |                                                                                                                                                                                                                                                                                     |                      |

37 \*It is strongly recommended that this checklist be read in conjunction with the SPIRIT 2013 Explanation & Elaboration for important clarification on the items.  
 38 Amendments to the protocol should be tracked and dated. The SPIRIT checklist is copyrighted by the SPIRIT Group under the Creative Commons  
 39 "[Attribution-NonCommercial-NoDerivs 3.0 Unported](https://creativecommons.org/licenses/by-nc-nd/3.0/)" license.  
 40



# BMJ Open

## Hospital at Home care for older patients with cognitive impairment: A protocol for a randomized controlled feasibility trial

|                                 |                                                                                                                                                                                                                                                                                                                                                                                                                                                                                                                                                                                                                                                                                                                                                                                                           |
|---------------------------------|-----------------------------------------------------------------------------------------------------------------------------------------------------------------------------------------------------------------------------------------------------------------------------------------------------------------------------------------------------------------------------------------------------------------------------------------------------------------------------------------------------------------------------------------------------------------------------------------------------------------------------------------------------------------------------------------------------------------------------------------------------------------------------------------------------------|
| Journal:                        | <i>BMJ Open</i>                                                                                                                                                                                                                                                                                                                                                                                                                                                                                                                                                                                                                                                                                                                                                                                           |
| Manuscript ID                   | bmjopen-2017-020332.R1                                                                                                                                                                                                                                                                                                                                                                                                                                                                                                                                                                                                                                                                                                                                                                                    |
| Article Type:                   | Protocol                                                                                                                                                                                                                                                                                                                                                                                                                                                                                                                                                                                                                                                                                                                                                                                                  |
| Date Submitted by the Author:   | 21-Dec-2017                                                                                                                                                                                                                                                                                                                                                                                                                                                                                                                                                                                                                                                                                                                                                                                               |
| Complete List of Authors:       | Pouw, Maaïke; University of Groningen, University Medical Center Groningen, Department of Geriatrics; Martini Hospital, Department of Internal Medicine<br>Calf, Agneta; University of Groningen, University Medical Center Groningen, Department of Geriatrics<br>van Munster, Barbara; University of Groningen, University Medical Center Groningen, Department of Geriatrics; Gelre Hospitals, Department of Geriatrics<br>ter Maaten, Jan; University of Groningen, University Medical Center Groningen, Department of Internal Medicine, Emergency Department<br>Smidt, Nynke; University of Groningen, University Medical Center Groningen, Department of Epidemiology, The Netherlands<br>De Roolj, Sophia; University of Groningen, University Medical Center Groningen, Department of Geriatrics |
| <b>Primary Subject Heading</b>: | Geriatric medicine                                                                                                                                                                                                                                                                                                                                                                                                                                                                                                                                                                                                                                                                                                                                                                                        |
| Secondary Subject Heading:      | Patient-centred medicine                                                                                                                                                                                                                                                                                                                                                                                                                                                                                                                                                                                                                                                                                                                                                                                  |
| Keywords:                       | Dementia < NEUROLOGY, Organisation of health services < HEALTH SERVICES ADMINISTRATION & MANAGEMENT, GERIATRIC MEDICINE, Delirium & cognitive disorders < PSYCHIATRY, INTERNAL MEDICINE                                                                                                                                                                                                                                                                                                                                                                                                                                                                                                                                                                                                                   |
|                                 |                                                                                                                                                                                                                                                                                                                                                                                                                                                                                                                                                                                                                                                                                                                                                                                                           |

SCHOLARONE™  
Manuscripts

**Public title**

Hospital at Home care for older patients with cognitive impairment and an acute medical illness

**Scientific title**

Hospital at Home care for older patients with cognitive impairment: A protocol for a randomized controlled feasibility trial

Maaïke A Pouw,<sup>1,2</sup> Agneta H Calf,<sup>1</sup> Barbara C van Munster,<sup>1,3</sup> Jan C ter Maaten,<sup>4</sup> Nynke Smidt,<sup>1,5</sup> & Sophia E de Rooij<sup>1</sup>

**Acronym**

H@H

**Abstract**

**INTRODUCTION:** An acute hospital admission is a stressful life event for older people, particularly for those with cognitive impairment. The hospitalisation is often complicated by hospital-associated geriatric syndromes, including delirium and functional loss, leading to functional decline and nursing home admission. Hospital at Home care aims to avoid hospitalisation-associated adverse outcomes in older patients with cognitive impairment by providing hospital care in the patient's own environment.

**METHODS AND ANALYSIS:** This randomized, non-blinded feasibility trial aims to assess the feasibility of conducting a randomized controlled trial in terms of the recruitment, use and acceptability of Hospital at Home care for older patients with cognitive impairment. The quality of care will be evaluated and the advantages and disadvantages of the Hospital at Home care program compared to usual hospital care. Eligible patients will be randomized either to Hospital at Home care in their own environment or usual hospital care. The intervention consists of hospital level care provided at patients' homes, including visits from health care professionals, diagnostics (laboratory tests, blood cultures) and treatment. The control group will receive usual hospital care. Measurements will be conducted at baseline, during admission, at discharge and at three and six months after the baseline assessment.

**ETHICS AND DISSEMINATION:** Institutional ethics approval has been granted. The findings will be disseminated through public lectures, professional and scientific conferences, as well as peer-reviewed journal articles. The study findings will contribute to knowledge on the implementation of Hospital at Home care for older patients with cognitive disorders. The results will be used to inform and support strategies to deliver eligible care to older patients with cognitive impairment.

**TRIAL REGISTRATION:** This study was registered with the NTR registry (NTR6581) on 26 July 2017.

**Keywords:** Dementia, Cognition disorders, Central Nervous System Diseases, Aged, Home Care Services; Hospital-Based, Hospitalization, Randomized Controlled Trials, Hospital at Home

## Strengths and limitations of this study

---

- This study addresses the feasibility of Hospital at Home care in patients with cognitive impairment, a patient population that is often excluded from participation in scientific research
- A process evaluation facilitates the investigation of factors that influence the experiences and perceptions of all persons involved in Hospital at Home care
- Stakeholders were involved in the development of the design of the study which will support the implementation of Hospital at Home care and a future trial
- Because of a limited sample size due to the study being centered on feasibility, results will not show effectiveness of Hospital at Home care compared to usual hospital care.

## Introduction

---

### Background

An acute hospital admission is a stressful life event, particularly for older people. In addition to the stress of an acute illness, the hospital admission itself contributes to this stress.<sup>1</sup> Older hospitalized patients are often deprived of sleep, and they spend an average of 20 of every 24 hours in bed, they become poorly nourished, and experience sensory deprivation or overstimulation, resulting in confusion.<sup>2-5</sup> These adverse effects of hospitalization contribute to the occurrence of geriatric conditions, such as delirium, functional decline, falls, incontinence, hospital acquired infections and pressure injuries.<sup>6-9</sup> Adverse effects of hospitalization occur more easily in older people, particularly in those who are already frail, a growing portion of the worldwide ageing population.<sup>10,11</sup> Frailty is a state of increased vulnerability to external stressors resulting from aging-associated declines in reserve and function across multiple physiologic systems.<sup>10</sup> Cognitive impairment (i.e., dementia) is an important contributor to frailty in older people.<sup>12</sup> Cognitively impaired older people are more likely to become hospitalised and once admitted, they experience longer stays than their peers without cognitive impairment.<sup>13-15</sup> The combination of hospitalization and cognitive impairment in older people is associated with further functional and cognitive declines and higher mortality rates, and it leads to more discharges to long-term care facilities.<sup>16,17</sup> The prevalence and worldwide burden of cognitive impairment will continue to increase as the average life expectancy increases.<sup>18</sup> The total number of people with cognitive impairment is estimated to be 75.6 million in 2030 and will nearly triple in 2050 to 135.5 million.<sup>19</sup> An increase in the number of hospital admissions of older people with cognitive impairment and an increase in number of hospitalisation-associated adverse outcomes are therefore to be expected.

1  
2  
3 75 Besides adverse outcomes of hospitalization, many older people and their caregivers do not  
4 76 necessarily desire a hospital admission in case of an acute illness or exacerbation of a chronic illness.  
5  
6 77 Fried et al. (2000) have studied the preferences of community-dwelling persons 65 years of age and  
7  
8 78 older who were hospitalized with a primary diagnosis of congestive heart failure, chronic obstructive  
9  
10 79 pulmonary disease or pneumonia. The authors reported that over 50% of older patients preferred to  
11  
12 80 receive hospital treatment at home, because they felt that their homes were more comfortable.<sup>20</sup> In  
13  
14 81 the treatment preferences of seriously ill patients 60 years of age and older, the likelihood of  
15  
16 82 cognitive and functional impairment as an adverse outcome of the treatment was weighed in the  
17  
18 83 decision-making process. There was a substantial decrease in the number of participants who opted  
19  
20 84 for treatment if the likelihood of impairment after treatment was 50% or higher.<sup>21</sup>

21  
22 85  
23 86 Hospital at Home care could provide an effective alternative to inpatient care for a select group of  
24  
25 87 elderly patients now requiring hospitalisation. Hospital at Home care is coordinated, multidisciplinary  
26  
27 88 care in the homes of people who would otherwise be admitted to the hospital. Hospital at Home  
28  
29 89 care is an accepted alternative to inpatient hospital level care in several countries (e.g., the United  
30  
31 90 States, Australia, Italy and the United Kingdom) but not yet in the Netherlands.<sup>22</sup> Since the 1990s,  
32  
33 91 Hospital at Home has been evaluated in (older) persons with various acute medical conditions, such  
34  
35 92 as heart failure, exacerbations in chronic obstructive pulmonary disease (COPD) and infections (e.g.,  
36  
37 93 cellulitis, pneumonia).<sup>22</sup> In systematic reviews comparing alternative strategies to inpatient  
38  
39 94 hospitalization, lower or equal mortality rates and return hospitalization rates (i.e., subsequent  
40  
41 95 admissions after discharge) were found for Hospital at Home care, there was a lower incidence of  
42  
43 96 delirium, and there was a positive effect on patient and caregiver satisfaction.<sup>22-24</sup> Only one  
44  
45 97 completed trial conducted in Italy included 109 patients with cognitive impairment (i.e. dementia),  
46  
47 98 Tibaldi et al. reported a positive effect of a Hospital at Home intervention on behavioural  
48  
49 99 disturbances and caregiver stress in patients with dementia.<sup>25</sup> Results of a still on-going trial including  
50  
51 100 people with i.a. cognitive impairment in the United Kingdom, will follow in the near future.<sup>26</sup>

52  
53 101 Whether Hospital at Home care provides a suitable alternative with regard to other outcomes as  
54  
55 102 patient satisfaction, quality of care, hospitalisation-associated adverse events and costs in older  
56  
57 103 people with cognitive impairment remains unclear and further research is needed. Therefore, our  
58  
59 104 primary aim is to investigate the feasibility of a Hospital at Home care program for older patients  
60  
105 with cognitive impairment in terms of the patient recruitment, use and acceptability, and secondly to  
106  
107 investigate the advantages and disadvantages of Hospital at Home care compared to usual hospital  
108  
109 care from different perspectives.

110  
111  
112  
113  
114  
115  
116  
117  
118  
119  
120  
121  
122  
123  
124  
125  
126  
127  
128  
129  
130  
131  
132  
133  
134  
135  
136  
137  
138  
139  
140  
141  
142  
143  
144  
145  
146  
147  
148  
149  
150  
151  
152  
153  
154  
155  
156  
157  
158  
159  
160  
161  
162  
163  
164  
165  
166  
167  
168  
169  
170  
171  
172  
173  
174  
175  
176  
177  
178  
179  
180  
181  
182  
183  
184  
185  
186  
187  
188  
189  
190  
191  
192  
193  
194  
195  
196  
197  
198  
199  
200  
201  
202  
203  
204  
205  
206  
207  
208  
209  
210  
211  
212  
213  
214  
215  
216  
217  
218  
219  
220  
221  
222  
223  
224  
225  
226  
227  
228  
229  
230  
231  
232  
233  
234  
235  
236  
237  
238  
239  
240  
241  
242  
243  
244  
245  
246  
247  
248  
249  
250  
251  
252  
253  
254  
255  
256  
257  
258  
259  
260  
261  
262  
263  
264  
265  
266  
267  
268  
269  
270  
271  
272  
273  
274  
275  
276  
277  
278  
279  
280  
281  
282  
283  
284  
285  
286  
287  
288  
289  
290  
291  
292  
293  
294  
295  
296  
297  
298  
299  
300  
301  
302  
303  
304  
305  
306  
307  
308  
309  
310  
311  
312  
313  
314  
315  
316  
317  
318  
319  
320  
321  
322  
323  
324  
325  
326  
327  
328  
329  
330  
331  
332  
333  
334  
335  
336  
337  
338  
339  
340  
341  
342  
343  
344  
345  
346  
347  
348  
349  
350  
351  
352  
353  
354  
355  
356  
357  
358  
359  
360  
361  
362  
363  
364  
365  
366  
367  
368  
369  
370  
371  
372  
373  
374  
375  
376  
377  
378  
379  
380  
381  
382  
383  
384  
385  
386  
387  
388  
389  
390  
391  
392  
393  
394  
395  
396  
397  
398  
399  
400  
401  
402  
403  
404  
405  
406  
407  
408  
409  
410  
411  
412  
413  
414  
415  
416  
417  
418  
419  
420  
421  
422  
423  
424  
425  
426  
427  
428  
429  
430  
431  
432  
433  
434  
435  
436  
437  
438  
439  
440  
441  
442  
443  
444  
445  
446  
447  
448  
449  
450  
451  
452  
453  
454  
455  
456  
457  
458  
459  
460  
461  
462  
463  
464  
465  
466  
467  
468  
469  
470  
471  
472  
473  
474  
475  
476  
477  
478  
479  
480  
481  
482  
483  
484  
485  
486  
487  
488  
489  
490  
491  
492  
493  
494  
495  
496  
497  
498  
499  
500  
501  
502  
503  
504  
505  
506  
507  
508  
509  
510  
511  
512  
513  
514  
515  
516  
517  
518  
519  
520  
521  
522  
523  
524  
525  
526  
527  
528  
529  
530  
531  
532  
533  
534  
535  
536  
537  
538  
539  
540  
541  
542  
543  
544  
545  
546  
547  
548  
549  
550  
551  
552  
553  
554  
555  
556  
557  
558  
559  
560  
561  
562  
563  
564  
565  
566  
567  
568  
569  
570  
571  
572  
573  
574  
575  
576  
577  
578  
579  
580  
581  
582  
583  
584  
585  
586  
587  
588  
589  
590  
591  
592  
593  
594  
595  
596  
597  
598  
599  
600  
601  
602  
603  
604  
605  
606  
607  
608  
609  
610  
611  
612  
613  
614  
615  
616  
617  
618  
619  
620  
621  
622  
623  
624  
625  
626  
627  
628  
629  
630  
631  
632  
633  
634  
635  
636  
637  
638  
639  
640  
641  
642  
643  
644  
645  
646  
647  
648  
649  
650  
651  
652  
653  
654  
655  
656  
657  
658  
659  
660  
661  
662  
663  
664  
665  
666  
667  
668  
669  
670  
671  
672  
673  
674  
675  
676  
677  
678  
679  
680  
681  
682  
683  
684  
685  
686  
687  
688  
689  
690  
691  
692  
693  
694  
695  
696  
697  
698  
699  
700  
701  
702  
703  
704  
705  
706  
707  
708  
709  
710  
711  
712  
713  
714  
715  
716  
717  
718  
719  
720  
721  
722  
723  
724  
725  
726  
727  
728  
729  
730  
731  
732  
733  
734  
735  
736  
737  
738  
739  
740  
741  
742  
743  
744  
745  
746  
747  
748  
749  
750  
751  
752  
753  
754  
755  
756  
757  
758  
759  
760  
761  
762  
763  
764  
765  
766  
767  
768  
769  
770  
771  
772  
773  
774  
775  
776  
777  
778  
779  
780  
781  
782  
783  
784  
785  
786  
787  
788  
789  
790  
791  
792  
793  
794  
795  
796  
797  
798  
799  
800  
801  
802  
803  
804  
805  
806  
807  
808  
809  
810  
811  
812  
813  
814  
815  
816  
817  
818  
819  
820  
821  
822  
823  
824  
825  
826  
827  
828  
829  
830  
831  
832  
833  
834  
835  
836  
837  
838  
839  
840  
841  
842  
843  
844  
845  
846  
847  
848  
849  
850  
851  
852  
853  
854  
855  
856  
857  
858  
859  
860  
861  
862  
863  
864  
865  
866  
867  
868  
869  
870  
871  
872  
873  
874  
875  
876  
877  
878  
879  
880  
881  
882  
883  
884  
885  
886  
887  
888  
889  
890  
891  
892  
893  
894  
895  
896  
897  
898  
899  
900  
901  
902  
903  
904  
905  
906  
907  
908  
909  
910  
911  
912  
913  
914  
915  
916  
917  
918  
919  
920  
921  
922  
923  
924  
925  
926  
927  
928  
929  
930  
931  
932  
933  
934  
935  
936  
937  
938  
939  
940  
941  
942  
943  
944  
945  
946  
947  
948  
949  
950  
951  
952  
953  
954  
955  
956  
957  
958  
959  
960  
961  
962  
963  
964  
965  
966  
967  
968  
969  
970  
971  
972  
973  
974  
975  
976  
977  
978  
979  
980  
981  
982  
983  
984  
985  
986  
987  
988  
989  
990  
991  
992  
993  
994  
995  
996  
997  
998  
999  
1000

Objectives of this study are:

- 1  
2  
3 110 1) To assess the participation rate of the Hospital at Home trial among patients 65 years and older  
4 111 with cognitive impairment, acute illness, and emergency hospital admission. What are the reasons  
5  
6 112 for non-participation?  
7 113 2) To assess the potential advantages and disadvantages of Hospital at Home care and usual hospital  
8 114 care for the patients, caregivers and Dutch medical health system.  
9  
10 115 3) To assess the feasibility of Hospital at Home care in terms of the quality of care with regard to  
11 116 geriatric syndromes, institutionalization, mortality, total days with urinary catheter, length of stay (in  
12 117 the hospital or in Hospital at Home care) and timing/intensity of the contact with health care  
13  
14 118 professionals.

## 119 **Methods and analysis**

---

### 120 121 **Trial design**

122 The design is a randomized controlled feasibility trial and will utilize a process evaluation. This study  
123 will be conducted at the medical emergency department (ED) of the academic hospital of the  
124 University Medical Center of Groningen in the Netherlands and will evaluate cognitively impaired  
125 older patients who are in need of acute hospital care. Figure 1 shows the trial design summary.

126 Participants will be randomized to either Hospital at Home care or usual hospital care in a 4:1 ratio,  
127 respectively. Patients will be randomized using a computerized random number generator  
128 (<http://www.randomization.com>), including block randomization.

129 An independent research nurse who is not involved in the patient care will complete the baseline  
130 assessment and allocate the participants (using sealed sequenced envelopes) into the Hospital at  
131 Home care (intervention) or usual hospital care group (control). The research nurse will not be aware  
132 of the randomization method. The participants, health care professionals and research staff will not  
133 be blinded to the intervention. The reporting of the design of this trial protocol is in accordance with  
134 the SPIRIT 2013 statement for clinical trial protocols.<sup>27</sup>

135

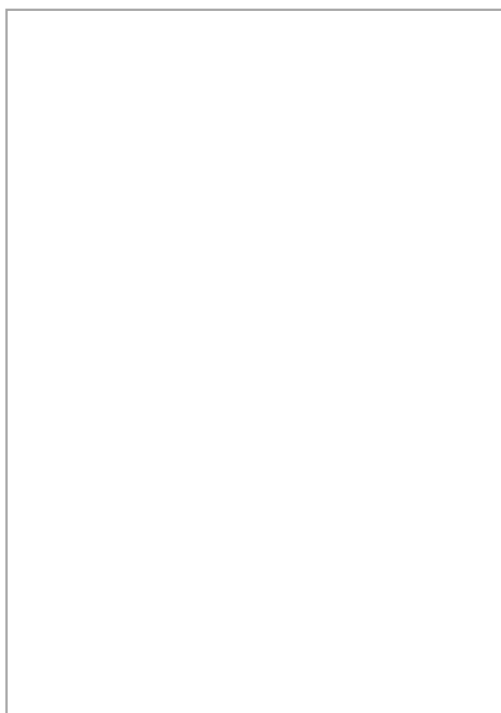

136  
137

**Figure 1**

### 138 **Study population**

139 Patients 65 years of age and older who are admitted to the medical emergency department (ED) will  
140 be identified by the ED staff as potential eligible patients. Subsequently, the ED staff will inform the  
141 research nurse. The research nurse will complete the eligibility criteria checklist (table 1). The  
142 research nurse will ask the patient and their informal caregiver (i.e., partner, child, relative, friend)  
143 for their willingness to participate in the study and to provide written informed consent. The patient  
144 and informal caregiver will need to both sign the informed consent form before the patient can  
145 participate in the H@H trial.

146 An evaluation to assess the mental capacity is conducted by the involved ED staff in the setting of the  
147 emergency department assessment. If the participant lacks the capacity to consent (mentally  
148 incapacitated), and an informal caregiver (i.e., partner, child, friend) is present, this informal  
149 caregiver will be asked to act as a personal consultee. The personal consultee will determine whether  
150 he or she believes that participation in the study would be in accordance with the values and  
151 interests of the individual and will subsequently sign the patient's informed consent form.

152

153 **Table 1** Patient eligibility criteria for participation in Hospital at Home trial

| Inclusion criteria                                                                                                                                                                                                                                                                                                                                                                                                                                                                                                                                                                                                                                                                                                                                                                                                                                                                                                                                                                                                                                                                                                                                    | Exclusion criteria                                                                                                                                                                                                                                                                                                                                                                                                                                                                                                                                                                                                                                                                                                               |
|-------------------------------------------------------------------------------------------------------------------------------------------------------------------------------------------------------------------------------------------------------------------------------------------------------------------------------------------------------------------------------------------------------------------------------------------------------------------------------------------------------------------------------------------------------------------------------------------------------------------------------------------------------------------------------------------------------------------------------------------------------------------------------------------------------------------------------------------------------------------------------------------------------------------------------------------------------------------------------------------------------------------------------------------------------------------------------------------------------------------------------------------------------|----------------------------------------------------------------------------------------------------------------------------------------------------------------------------------------------------------------------------------------------------------------------------------------------------------------------------------------------------------------------------------------------------------------------------------------------------------------------------------------------------------------------------------------------------------------------------------------------------------------------------------------------------------------------------------------------------------------------------------|
| <ul style="list-style-type: none"> <li>▪ Age 65 years of age and older</li> <li>▪ Cognitive impairment, i.e. dementia, delirium or other cause of cognitive impairment, and either:               <ul style="list-style-type: none"> <li>○ previously diagnosed or documented in the medical records or</li> <li>○ identified by the ED-clinician (e.g., with the 4AT-test and/or Six item cognitive impairment test)<sup>28-30</sup></li> </ul> </li> <li>▪ Presented at the ED with a defined acute illness</li> <li>▪ Required hospital admission, according to the attending ED physician but not expected to require emergency interventions               <ul style="list-style-type: none"> <li>○ Modified Early Warning Score (MEWS) <math>\leq 2</math> points<sup>31-33</sup></li> </ul> </li> <li>▪ Living in hospital's catchment area (&lt; 25 km)</li> <li>▪ Informal caregiver is present and able to understand and perform instructions and consented to participate in the trial</li> <li>▪ Home suitable for Hospital at Home care (available informal caregiver, running water, adequate heating, safety)<sup>30</sup></li> </ul> | <ul style="list-style-type: none"> <li>▪ Previously enrolled</li> <li>▪ Hospitalized within the seven days preceding ED presentation</li> <li>▪ Nursing home residents or awaiting a nursing home place on an active waiting list (excluding so-called sleeping waiting list candidates)<sup>27</sup></li> <li>▪ Additional care needed               <ul style="list-style-type: none"> <li>○ Required surgical assessment</li> <li>○ Suspected acute coronary syndrome or cardiac arrhythmia<sup>31</sup></li> <li>○ Dialysis dependent patients<sup>31</sup></li> <li>○ Expected terminal events<sup>31</sup> or in need of diagnostic or palliative care due to oncological or haematological illness</li> </ul> </li> </ul> |

154 ED= Emergency department

155

### 156 **Sample size of study population**

157 Based on the numbers available from the emergency department (ED) of the University Medical  
 158 Center Groningen, the Netherlands, we calculated that an average of 3990 older patients 65 years  
 159 and over is admitted to our medical ED each year. The Hospital at Home trial will be introduced  
 160 during working hours, which provides an estimated 1900 patients per year. Not all 1900 patients will  
 161 be eligible for study inclusion. Based on screening of ED medical records, approximately 15% of the  
 162 patients meet the eligibility criteria for Hospital at Home care, resulting in 285 eligible persons per  
 163 year. In recent randomized controlled trials (RCTs) of Hospital at Home care in Italy, 54% and 57% of  
 164 the eligible patients was willing to participate and gave informed consent.<sup>34,35</sup> We presume a similar  
 165 consent rate of 50%, as described in these previous clinical trials, and expect for 143 patients to be  
 166 included.

### 167 **Study procedures**

168 After (written) informed consent is obtained, all participants will complete two brief tests to assess  
 169 cognitive impairment, and the participant and caregiver will complete the baseline assessment.  
 170 Subsequently, randomization takes place to either (a) the Hospital at Home care-intervention,  
 171 translocation of care from the hospital to a participants' home or (b) the control group, usual  
 172 hospital care. All care will be delivered according to hospital protocols, current regulations and

1  
2  
3 173 guidelines and, if needed, described in the standard operating procedures (SOPs). If no informed  
4 174 consent is given by either the patient or the caregiver, the reasons for non-participation, date of  
5  
6 175 birth, sex of the patient and the relationship between patient and caregiver will be reported.  
7

## 8 176 **Intervention**

### 9 177 **Hospital at Home care**

10 178 Hospital at Home care will be delivered by a multidisciplinary team consisting of a physician, nurse,  
11  
12 179 pharmacist and physiotherapist. Depending on the participants' needs, other disciplines (e.g., a  
13  
14 180 dietician, occupational therapist or social services) can be involved in the Hospital at Home care. The  
15  
16 181 day-to-day care will be provided by the nurse and physician visiting the participant. The Hospital at  
17  
18 182 Home care team works under the responsibility of the medical specialist in the hospital, and 24/7  
19  
20 183 consultation of the expertise and services of the hospital is part of the protocol.  
21

22  
23 185 The participants allocated to Hospital at Home care will receive hospital level care in their own  
24  
25 186 homes. After a stay of one night in the hospital, while the Hospital at Home care arrangements are  
26  
27 187 being made, the participant will be transferred home and receive Hospital at Home care. The  
28  
29 188 Hospital at Home nurse is responsible for the day-to-day care and will be present upon arrival of the  
30  
31 189 participant at his/her residence. Hospital at Home care is described in the care protocols including  
32  
33 190 SOPs and could include intravenous therapy (e.g., antibiotics, fluid, and/or diuretics), oxygen therapy,  
34  
35 191 and/or nebulizer, indwelling urine catheter or a nasopharyngeal food tube. After the care intake and  
36  
37 192 a period of direct nursing supervision, the participant will receive intermittent nursing visits daily  
38  
39 193 (starting with 3x/day), including weekends and public holidays. The Hospital at Home physician will  
40  
41 194 make a home visit every day (excl. weekends). The Hospital at Home physician and nurse will be  
42  
43 195 available for emergency visits. The participant will receive a medical alert device in the house, with a  
44  
45 196 24/7 connection to an on-call service. Alert instructions will be explained to the participant and  
46  
47 197 caregiver. A physiotherapist will visit the participant at home to evaluate any problems with balance  
48  
49 198 and/or walking and immobility. The Hospital at Home team works under the supervision of the  
50  
51 199 hospital medical specialist. Daily screenings and measurements will be recorded in a Hospital at  
52  
53 200 Home record, which stays with the participant. Diagnostic procedures and therapeutics that cannot  
54  
55 201 wait and are not available at home, such as endoscopy or CT-scan, will be arranged through brief  
56  
57 202 visits to the hospital. The participant will be 'admitted' to the Hospital at Home care for as long as  
58  
59 203 indicated.

### 60 204 *Discharge from Hospital at Home*

205 If the participant recovers to such an extent that hospital level care is no longer needed, the  
206 participant will be discharged from the Hospital at Home care program, similar to the discharge



1  
2  
3 207 procedure when the participant would receive usual hospital care. Hospital at Home care will end  
4 208 with discharge planning with the participant, family, Hospital at Home physician and nurse. The  
5 209 discharge plan includes follow-up appointments (e.g., at the hospital or general practitioner),  
6 210 information on medication, warning signs and symptoms and an on-going management plan. All  
7 211 hospital-related care equipment will be removed from the participants' house, and arrangements  
8 212 with homecare agencies and/or paramedical staff will be reviewed and adjusted to the current  
9 213 situation.

#### 14 214 **Hospital care as usual**

15 215 Participants allocated to the control arm will be admitted to a hospital ward and receive usual  
16 216 hospital care. After admission and intake on the ward, the participant will receive intermittent visits  
17 217 from the ward nurse multiple times a day. The ward physician will visit once every day (excl.  
18 218 weekends), with extra visits provided if needed. An emergency alert device, through which nurses  
19 219 and physician can be contacted, will be placed next to the bed. A physiotherapist will visit the  
20 220 participant at the ward to address problems with balance and/or walking and immobility. Depending  
21 221 on the participants' needs, other disciplines (e.g., a dietician, occupational therapist or social  
22 222 services) can be involved in the hospital care. The medical record is the hospital record and  
23 223 additional H@H research forms will be added to this record for research purposes. The participant  
24 224 will be admitted to the hospital for as long as indicated.

25 225

#### 26 226 *Hospital discharge*

27 227 If the participant recovers to such an extent that hospital level care is no longer needed, the  
28 228 participant will be discharged from the hospital after discharge planning with the participant, family,  
29 229 physician and nurse. The discharge plan includes follow-up appointments (e.g., at the hospital or  
30 230 general practitioner), information on medication, warning signs and symptoms and an on-going  
31 231 management plan. Arrangements with homecare agencies and/or paramedical staff will be reviewed  
32 232 and adjusted to the current situation.

33 233

#### 34 234 **Follow-up**

35 235 At three and six months following randomization, all participants will be contacted for an interview  
36 236 by telephone<sup>36</sup> or a face-to-face interview, if needed. The participants will be allowed to receive  
37 237 support with these questions from their relatives or informal caregivers. An interview will require a  
38 238 maximum of 30 minutes. In case of institutionalization or mortality, this event will be recorded.  
39 239 Additionally, information on hospital readmission and length of stay will be collected from the

1  
2  
3 240 hospital administration system and health insurers. Mortality and nursing home placements will be  
4 241 collected from registries from the general practitioner and municipalities.

5  
6 242

7 243 **Timing of measurements and outcome measures**

8 244

9 245 Data will be collected at baseline at the emergency department, during admission (in Hospital at  
10 246 Home or hospital), at discharge and at three and six months following randomization, plus or minus  
11 247 two weeks. An overview of the timing of measurements and outcome measures are shown in Table  
12 248 2.

13  
14  
15 249

16  
17 250 *Feasibility*

18 251 For the participation rates, the proportion of participants per step will be calculated. The reasons for  
19 252 non-participation and data concerning the characteristics of non-participants will be collected. We  
20 253 consider the participation rate feasible when it is similar to the participation rate as is described in  
21 254 previous RCTs and around 50% of the eligible patients will consent to participate.<sup>34,35</sup> Quality of care  
22 255 will be measured by collecting data on patient, institutionalization (e.g., to the hospital or nursing  
23 256 home), mortality, ADL-functioning, prevalence of hospitalisation-associated geriatric syndromes, the  
24 257 length of stay in the hospital or Hospital at Home care program and contact with health care  
25 258 professionals. The study is considered feasible if the quality of care of Hospital at Home care on these  
26 259 measurements is non- inferior to usual hospital care.

27  
28  
29  
30  
31  
32  
33 260  
34  
35  
36  
37  
38  
39  
40  
41  
42  
43  
44  
45  
46  
47  
48  
49  
50  
51  
52  
53  
54  
55  
56  
57  
58  
59  
60

261 **Table 2** Overview of the content and description of outcome measures and timing of measurements

| Description and instrument                          |                                                                                                                                                                                                 | Timing of measurements |          |           |           |          |          |
|-----------------------------------------------------|-------------------------------------------------------------------------------------------------------------------------------------------------------------------------------------------------|------------------------|----------|-----------|-----------|----------|----------|
|                                                     |                                                                                                                                                                                                 | screening              | baseline | admission | discharge | 3 months | 6 months |
| Degree of illness based on physiological parameters | Vital signs alarm score; Modified Early Warning Score, <sup>37</sup>                                                                                                                            | R                      |          |           |           |          |          |
| Cognitive impairment                                | 4AT-test for delirium* Six item cognitive impairment test for cognitive impairment*, <sup>28,38</sup>                                                                                           | R                      |          |           |           |          |          |
| Socio-demographics                                  | Date of birth, nationality, household composition, marital status, highest level of education                                                                                                   |                        | R        |           |           |          |          |
| Health status                                       | Charlson co-morbidity index*, <sup>39</sup>                                                                                                                                                     |                        | R        |           |           |          |          |
| Identifying at-risk patients                        | Safety management system patient screening (VMS), <sup>40</sup>                                                                                                                                 |                        | R        |           |           |          |          |
| Functional status                                   | Activities of daily living, modified Katz-ADL index score, <sup>41</sup>                                                                                                                        |                        | R        |           | R         | R        | R        |
| Health status                                       | EQ-5d-5l*, <sup>42</sup>                                                                                                                                                                        |                        | R        |           | R         | R        | R        |
| (Health-related) quality of life, well-being        | Icepap capability measure for Older people (ICECAP-O)* <sup>43</sup>                                                                                                                            |                        | R        |           | R         | R        | R        |
| Caregiver burden                                    | Self-rated burden scale*, caregiver strain index*, <sup>44,45</sup>                                                                                                                             |                        | C        |           | C         | C        | C        |
| Medical consumption                                 | Imta Medical Consumption Questionnaire (imcq)*, <sup>46</sup>                                                                                                                                   |                        | P,C      |           |           | P,C      | P,C      |
| Hospitalisation-associated geriatric syndromes      | Infections, falls, pressure injuries, in case of delirium; delirium observation scale score (DOSS) <sup>47</sup> and use of physical or chemical restraints, total days with a urinary catheter |                        |          | N         |           |          |          |
| Nutrition                                           | Malnutrition Universal Screening Tool (MUST), <sup>48</sup>                                                                                                                                     |                        | N        |           |           |          |          |
|                                                     | Food intake, fluid intake                                                                                                                                                                       |                        |          | N         |           |          |          |
| Pain                                                | Numeric Rating Scale-score (NRS) for pain <sup>49</sup>                                                                                                                                         |                        |          | N         |           |          |          |
| Health perception                                   | (Rotterdam) symptom checklist* <sup>50</sup>                                                                                                                                                    |                        |          | N         |           |          |          |
| Immobility                                          | Hierarchical assessment of balance and mobility (HABAM) <sup>51</sup>                                                                                                                           |                        |          | Ph        |           |          |          |
| Satisfaction with care                              | Client Satisfaction Questionnaire 8 (CSQ-8)*, care evaluation question*, <sup>52,53</sup>                                                                                                       |                        |          |           | P         | P,C      | N,D      |
| Mortality                                           | Mortality at 30 days, 3 months and 6 months after baseline*                                                                                                                                     |                        |          |           | N         | R        | R        |
| (Re)admission hospital                              | Length of stay, readmission rate at 30 days, 3 months and 6 months after baseline*                                                                                                              |                        |          |           | N         | R        | R        |

262 Assessed by: P= Participant, C=Caregiver, N= Nurse, D= Doctor, R= Research nurse, Ph=Physiotherapist.

263 (\*)= All assessments marked by an asterisk are extra for trial purposes and are not part of the medical treatment

264

265 *Other outcomes measures*

266 Advantages and disadvantages of the Hospital at Home care program will be assessed through  
 267 multiple instruments and questionnaires. The instruments are validated and used in community-  
 268 dwelling older patients with cognitive disorders. Additional data will be collected on the time spent  
 269 at home (home-time); total number of days alive and out of the hospital or a skilled nursing facility in  
 270 the 6 months following the randomization at the emergency department,<sup>54</sup> the number of transfers  
 271 (home ↔ hospital) and the number of health care professionals involved.

1  
2  
3 272 Cost data will be collected, as described by Drummond et al., including the costs to the health care  
4 273 system, patients and families, and other sectors.<sup>55</sup> The volume of care use will be extracted from  
5  
6 274 hospital files and combined with the reference cost values, as provided by the cost guidance module  
7 275 of the Dutch National Health Care Institute.<sup>56</sup>  
8  
9

## 10 276 **Process evaluation**

11  
12 277 A process evaluation will be conducted as part of the feasibility study to understand the barriers and  
13 278 facilitators to participate and to gain an understanding of the experiences and perceptions of  
14  
15 279 Hospital at Home care of participants and health care professionals. From all eligible patients who  
16  
17 280 declined to participate, data concerning the patient characteristics and reasons for non-participation  
18  
19 281 will be collected. At the end of the trial, a representative sample of participants and/or their informal  
20  
21 282 caregivers will be invited for an interview to evaluate their experiences receiving Hospital at Home  
22  
23 283 care. The interviewer will not be a an active member of the research team or involved in day-to-day  
24  
25 284 care and will explore independently how the participants perceived Hospital at Home care, including  
26  
27 285 the contact with the health professionals and the impact of Hospital at Home care on their lives and  
28  
29 286 their caregivers' personal lives. In case of participant dropout, efforts will be made to obtain an  
30  
31 287 understanding of why the participants did not complete the trial.

32  
33 288 In addition, a representative sample of health care professionals, consisting of physicians and nurses  
34  
35 289 working in the Emergency Department, physicians and nurses providing the Hospital at Home care,  
36  
37 290 and general practitioners, will be asked to participate in a face-to-face interview. The health care  
38  
39 291 professionals will be asked about their experiences and opinions about the H@H-trial and Hospital at  
40  
41 292 Home care. All interviews will be transcribed verbatim, and a framework analysis will be used as the  
42  
43 293 method of qualitative data analysis.<sup>57</sup>

## 44 294 **Data management**

45  
46 295 All data will be entered in an electronic trial-specific database, with the participants identified by a  
47  
48 296 unique trial number. Confidentiality of participant information will be maintained throughout the  
49  
50 297 trial. Information can only be traced to the participants by designated researchers. The database will  
51  
52 298 be stored and maintained by Castor Electronic Data Capture, compliant with GCP guidelines and the  
53  
54 299 European Data Protection Directive (Castor Electronic Data Capture, Ciwit BV, Amsterdam, the  
55  
56 300 Netherlands, 2017). Data will be stored for a maximum period of 15 years after the study has ended,  
57  
58 301 according to Dutch law.<sup>58</sup>  
59  
60

## 302 **Statistical analysis**

303

304 The participant flow diagram, according to CONSORT guidelines,<sup>59</sup> will provide a summary of the  
305 recruitment and declination rates in percentage (%) at baseline, discharge and three- and six-month  
306 follow-ups. Distributions of the data at baseline, discharge and three and six months after  
307 randomization will be explored, with unusual values noted and explained. Variables will be  
308 summarized as the n (%), mean (standard deviation) or median (interquartile range) for each group,  
309 to characterize the sample and search for any imbalances. The percentages, means and standard  
310 deviation, and medians and interquartile ranges will be calculated to describe the quality of care and  
311 the advantages and disadvantages of Hospital at Home care at baseline, discharge and three- and six-  
312 month follow-ups.

313

## 314 **Monitoring and participant safety**

315

316 Although, the H@H trial is considered to be a low risk trial, the participant safety will be monitored  
317 by an independent Data Monitoring Committee (DMC). The DMC will consist of two members: an  
318 experienced clinician and an epidemiologist. Members of the DMC are independent of the trial and  
319 will discuss each individual participant with serious adverse events. The DMC will receive and review  
320 the serious adverse events and evaluate the risk involved with negative outcomes. The DMC is  
321 authorized to make recommendations to temporary put on hold or ending the study prematurely  
322 when participant safety is an issue, based on their findings. All serious adverse events will be  
323 reported to the principal investigator within 24 hours of knowledge of the event and then  
324 subsequently reported to the Dutch portal for medical research involving human subjects.

## 325 **Discussion**

---

326 Reducing unwanted hospital admissions in older patients with cognitive impairments and facilitating  
327 patient-centred care in a patient's preferred location is a goal worthy of pursuing. This goal aligns  
328 with the tenet of the current Dutch government and the advice provided by the Dutch Council for the  
329 Environment and Infrastructure: to actively promote and enable people to live independently in their  
330 own homes for as long as they desire.<sup>60</sup> Previous trials and a recent review have confirmed that  
331 alternative management strategies for low-risk patients with acute medical conditions conventionally  
332 treated through hospitalization exist with positive impact on patient satisfaction, are effective and  
333 can be safely achieved in lower cost settings.<sup>22,23,61</sup>

1  
2  
3 334 Introducing a Hospital at Home care trajectory in the Netherlands is incited by the principles of value-  
4 335 based health care: improving the patients experience of care and as a result of this process reducing  
5 336 the costs.<sup>62</sup> All countries with an ageing population experience pressure, in terms of shortage of  
6 337 (emergency) hospital beds and rising healthcare costs. Hospital at Home care could be shown  
7 338 beneficial in facilitating higher valued care for patients and their caregivers without additional costs.  
8 339 Benefit should be measured in other outcomes than clinical indicators such as mortality. To illustrate,  
9 340 one of the outcomes of a future RCT could be the time spent at home. Time spent at home has been  
10 341 defined as the total number of days alive and out of the hospital or a skilled nursing facility in the 6  
11 342 months after hospital admission.<sup>54</sup> It has been used as a primary outcome in a follow-up study of  
12 343 older patients with acute hospital admissions, and has been demonstrated to be of more importance  
13 344 in older patients.<sup>63-65</sup> Evaluation of time spent a home in this feasibility study could support  
14 345 estimating a sample size based on a patient-relevant outcome in a future RCT.

15  
16  
17 346 This study will be the first to investigate the feasibility of providing acute hospital care at home for  
18 347 older patients with cognitive impairment in the Netherlands. Studying Hospital at Home care and  
19 348 identifying the barriers and facilitators will support the implementation of Hospital at Home care and  
20 349 break new ground for a future RCT investigating the (cost-)effectiveness.

## 30 **Ethics and Dissemination**

---

31  
32 351 This study was approved by the Medical Research Ethics Committee of the University Medical Center  
33 352 Groningen in April 2017, reference number: 2016.686 The trial will be conducted in accordance with  
34 353 the Declaration of Helsinki 1996, principles of good clinical practice and the University Medical  
35 354 Center of Groningen Research Code. Any protocol amendments will be submitted to the ethics  
36 355 committee. A register of the protocol amendments will be available in the study protocol.

37  
38 356 The results of the trial will be reported according to the CONSORT guidelines and will contribute to  
39 357 knowledge of the implementation of Hospital at Home care and patient-centred acute care for older  
40 358 patients with cognitive impairment. The study will also contribute to the knowledge of the  
41 359 transmurial cooperation and costs of providing care, in terms of the translocation of hospital care to  
42 360 home. Regularly updates will be published on the study website and in newsletters. Conferences and  
43 361 meetings will be held for all involved health care professionals. Participants who requested  
44 362 information on the study will be sent a lay summary. A publication policy will be agreed upon with  
45 363 co-applicants. The study findings will be published in relevant peer-reviewed journals.

46 364  
47 365

1  
2  
3 366 **Authors' affiliations**

4 367 <sup>1</sup> Department of Geriatrics, University Medical Center Groningen, University of Groningen, Groningen, the  
5 368 Netherlands

6 369 <sup>2</sup> Department of Internal Medicine, Martini Hospital, Groningen, The Netherlands.

7 370 <sup>3</sup> Department of Geriatrics, Gelre Hospitals, Apeldoorn, The Netherlands.

8 371 <sup>4</sup> Department of Internal Medicine, Emergency Department, University Medical Center Groningen, University of  
9 372 Groningen, Groningen, The Netherlands

10 373 <sup>5</sup> Department of Epidemiology, University of Groningen, University Medical Center Groningen, Groningen, The  
11 374 Netherlands.

12 375

13 376 **Acknowledgements** The authors would like to thank all care professionals of Alzheimer Nederland, Espria,  
14 377 Icare, TSN, Buurtzorg, umcGroningen thuis, MCZ, Netwerk Dementie Groningen, Netwerk Dementie Drenthe,  
15 378 Gemeente Groningen, WIJ Groningen, Zorgbelang, Healthy Aging Network Northern Netherlands, Stichting  
16 379 Effectieve Ouderenzorg, ZonMW, Deltaplan Dementie, Nationaal Programma Ouderenzorg, Zorg innovatie  
17 380 Forum and the elderly of Denktank 60+ Noord for their time, critical appraisal and advise.

18 381

19 382 **Contributors** MP drafted the manuscript. All authors were involved in making substantial contributions to the  
20 383 conception and design of the protocol and the critical revision of the manuscript for publication. All authors  
21 384 approved the final version to be published.

22 385

23 386 **Funding** This study is independent research funded by ZonMw (project Memorabel, Deltaplan Dementie),  
24 387 project number #733050401 (contact: memorabel@zonmw.nl). Additional funding is provided by the Dutch  
25 388 Ministry of Health, Welfare and Sport (Ministerie van Volksgezondheid, Welzijn en Sport) and the University  
26 389 Medical Center Groningen.

27 390

28 391 **Disclaimer** The views and opinions expressed in this paper are those of the authors and not necessarily those  
29 392 of the UMCG, Memorabel, Deltaplan Dementie or ZonMW.

30 393

31 394 **Competing interests** All authors have declared that they have no competing interests

32 395

33 396 **Ethics approval** for this study has been obtained from the Medical Research Ethics Committee of the University  
34 397 Medical Center Groningen April 2017 (ref: 2016.686).

35 398

36 399 **Recruitment status** is pending; participants are not yet being recruited or enrolled. Anticipated date of  
37 400 enrolment of the first participant is December 2017.

38 401

39 402 **Corresponding author:** m.a.pouw@umcg.nl. University Center of Geriatric Medicine, University Medical Center  
40 403 Groningen. Hanzeplein 1, Postbus 30 001, 9700 RB Groningen

41 404

42 405 **Scientific inquiries:** prof Sophia E.de Rooij, s.e.j.a.de.rooij@umcg.nl, telephone number 050-3613921,  
43 406 Hanzeplein 1, Postbus 30 001, 9700 RB Groningen. University of Groningen, University Medical Center  
44 407 Groningen, University Center for Geriatric Medicine, Groningen, The Netherlands.

45 408

46 409 Generic email address [hospitalathome@umcg.nl](mailto:hospitalathome@umcg.nl).

47 410

48 411 **Abbreviations**

49 412 ADL: Activities of Daily Living

50 413 CT: Computer Tomography

51 414 DMC: Data Monitoring Committee

52 415 ED: Emergency Department

53 416 H@H: Hospital at Home

54 417 RCT: Randomized Controlled Trial

55 418 UMCG: University Medical Center Groningen

56 419

57 419 **References**

58

59

60

- 420 (1) Krumholz HM. Post-Hospital Syndrome - A Condition of Generalized Risk. *N Engl J Med* 2013
- 421 01/10;368(2):100-102.
- 422 (2) Missildine K, Bergstrom N, Meininger J, Richards K, Foreman MD. Sleep in Hospitalized Elders: A Pilot Study.
- 423 *Geriatr Nurs* 2010 0;31(4):263-271.
- 424 (3) Brown CJ, Redden DT, Flood KL, Allman RM. The underrecognized epidemic of low mobility during
- 425 hospitalization of older adults. *J Am Geriatr Soc* 2009 Sep;57(9):1660-1665.
- 426 (4) Sullivan DH, Sun S, Walls RC. Protein-energy undernutrition among elderly hospitalized patients: a
- 427 prospective study. *JAMA* 1999 Jun 2;281(21):2013-2019.
- 428 (5) Creditor MC. Hazards of hospitalization of the elderly. *Ann Intern Med* 1993;118(3):219-223.
- 429 (6) Inouye SK, Studenski S, Tinetti ME, Kuchel GA. Geriatric Syndromes: Clinical, Research, and Policy
- 430 Implications of a Core Geriatric Concept. *J Am Geriatr Soc* 2007;55(5):780-791.
- 431 (7) Mudge AM, Banks MD, Barnett AG, Blackberry I, Graves N, Green T, et al. CHERISH (collaboration for
- 432 hospitalised elders reducing the impact of stays in hospital): protocol for a multi-site improvement program to
- 433 reduce geriatric syndromes in older inpatients. *BMC Geriatrics* 2017;17(1):11.
- 434 (8) Covinsky KE, Pierluissi E, Johnston CB. Hospitalization-associated disability: "She was probably able to
- 435 ambulate, but I'm not sure". *JAMA* 2011 Oct 26;306(16):1782-1793.
- 436 (9) Zisberg A, Shadmi E, Gur-Yaish N, Tonkikh O, Sinoff G. Hospital-associated functional decline: the role of
- 437 hospitalization processes beyond individual risk factors. *J Am Geriatr Soc* 2015 Jan;63(1):55-62.
- 438 (10) Fried LP, Tangen CM, Walston J, Newman AB, Hirsch C, Gottdiener J, et al. Frailty in older adults: evidence
- 439 for a phenotype. *J Gerontol A Biol Sci Med Sci* 2001 Mar;56(3):M146-56.
- 440 (11) Clegg A, Young J, Iliffe S, Rikkert MO, Rockwood K. Frailty in elderly people. *The Lancet* 2013 3/2-
- 441 8;381(9868):752-762.
- 442 (12) Ferrucci L, Guralnik JM, Studenski S, Fried LP, Cutler GB, Walston JD, et al. Designing Randomized,
- 443 Controlled Trials Aimed at Preventing or Delaying Functional Decline and Disability in Frail, Older Persons: A
- 444 Consensus Report. *J Am Geriatr Soc* 2004;52(4):625-634.
- 445 (13) Glover A, Bradshaw LE, Watson N, Laithwaite E, Goldberg SE, Whittamore KH, et al. Diagnoses, problems
- 446 and healthcare interventions amongst older people with an unscheduled hospital admission who have
- 447 concurrent mental health problems: a prevalence study. *BMC geriatrics* 2014;14(1):1.
- 448 (14) Pinkert C, Holle B. People with dementia in acute hospitals. Literature review of prevalence and reasons
- 449 for hospital admission. *Z Gerontol Geriatr* 2012 Dec;45(8):728-734.
- 450 (15) Mukadam N, Sampson EL. A systematic review of the prevalence, associations and outcomes of dementia
- 451 in older general hospital inpatients. *International Psychogeriatrics* 2011;23(03):344-355.
- 452 (16) Timmons S, Manning E, Barrett A, Brady NM, Browne V, O'Shea E, et al. Dementia in older people admitted
- 453 to hospital: a regional multi-hospital observational study of prevalence, associations and case recognition. *Age*
- 454 *Ageing* 2015 Nov;44(6):993-999.
- 455 (17) Bradshaw LE, Goldberg SE, Lewis SA, Whittamore K, Gladman JRF, Jones RG, et al. Six-month outcomes
- 456 following an emergency hospital admission for older adults with co-morbid mental health problems indicate
- 457 complexity of care needs. *Age and Ageing* 2013 September 01;42(5):582-588.
- 458 (18) Satizabal CL, Beiser AS, Chouraki V, Chêne G, Dufouil C, Seshadri S. Incidence of Dementia over Three
- 459 Decades in the Framingham Heart Study. *N Engl J Med* 2016 02/11; 2016/02;374(6):523-532.
- 460 (19) World Health Organization. Dementia Fact sheet. April 2016; Available at:
- 461 <http://www.who.int/mediacentre/factsheets/fs362/en/>. Accessed January 25, 2017.
- 462 (20) Fried TR, van Doorn C, O'Leary JR, Tinetti ME, Drickamer MA. Older persons' preferences for home vs
- 463 hospital care in the treatment of acute illness. *Arch Intern Med* 2000;160(10):1501-1506.
- 464 (21) Fried TR, Bradley EH, Towle VR, Allore H. Understanding the Treatment Preferences of Seriously Ill
- 465 Patients. *N Engl J Med* 2002 04/04; 2017/05;346(14):1061-1066.
- 466 (22) Shepperd S, Iliffe S, Doll HA, Clarke MJ, Kalra L, Wilson AD, et al. Admission avoidance hospital at home.
- 467 *The Cochrane Library* 2016.
- 468 (23) Conley J, O'Brien CW, Leff BA, Bolen S, Zulman D. Alternative strategies to inpatient hospitalization for
- 469 acute medical conditions: A systematic review. *JAMA Internal Medicine* 2016 November 1;176(11):1693-1702.
- 470 (24) Caplan G. Does 'Hospital in the Home' treatment prevent delirium? *Aging Health* 2008 02/01;
- 471 2017/12;4(1):69-74.
- 472 (25) Tibaldi V, Aimonino N, Ponzetto M, Stasi M, Amati D, Raspo S, et al. A randomized controlled trial of a
- 473 home hospital intervention for frail elderly demented patients: behavioral disturbances and caregiver's stress.
- 474 *Arch Gerontol Geriatr* 2004;38:431-436.



- 1  
2  
3 475 (26) Shepperd S, Craddock-Bamford A, Butler C, Ellis G, Godfrey M, Gray A, et al. A multi-centre randomised  
4 476 trial to compare the effectiveness of geriatrician-led admission avoidance hospital at home versus inpatient  
5 477 admission. *Trials* 2017;18:10.1186/s13063-017-2214-y.
- 6 478 (27) Chan AW, Tetzlaff JM, Altman DG, Laupacis A, Gotzsche PC, Krleza-Jeric K, et al. SPIRIT 2013 statement:  
7 479 defining standard protocol items for clinical trials. *Ann Intern Med* 2013 Feb 5;158(3):200-207.
- 8 480 (28) Bellelli G, Morandi A, Davis DHJ, Mazzola P, Turco R, Gentile S, et al. Validation of the 4AT, a new  
9 481 instrument for rapid delirium screening: a study in 234 hospitalised older people. *Age and Ageing* 2014 March  
10 482 02.
- 11 483 (29) Katzman R, Brown T, Fuld P, Peck A, Schechter R, Schimmel H. Validation of a short Orientation-Memory-  
12 484 Concentration Test of cognitive impairment. *Am J Psychiatry* 1983 Jun;140(6):734-739.
- 13 485 (30) Shepperd S, Harwood D, Jenkinson C, Gray A, Vessey M, Morgan P. Randomised controlled trial comparing  
14 486 hospital at home care with inpatient hospital care. I: three month follow up of health outcomes. *BMJ* 1998 Jun  
15 487 13;316(7147):1786-1791.
- 16 488 (31) Cei M, Bartolomei C, Mumoli N. In-hospital mortality and morbidity of elderly medical patients can be  
17 489 predicted at admission by the Modified Early Warning Score: a prospective study. *Int J Clin Pract*  
18 490 2009;63(4):591-595.
- 19 491 (32) Dundar ZD, Ergin M, Karamercan MA, Ayranci K, Colak T, Tuncar A, et al. Modified Early Warning Score and  
20 492 VitalPac Early Warning Score in geriatric patients admitted to emergency department. *Eur J Emerg Med* 2015.
- 21 493 (33) Ridley S. The recognition and early management of critical illness. *Ann R Coll Surg Engl* 2005 Sep;87(5):315-  
22 494 322.
- 23 495 (34) Aimonino Ricauda N, Tibaldi V, Leff B, Scarafiotti C, Marinello R, Zanocchi M, et al. Substitutive "hospital at  
24 496 home" versus inpatient care for elderly patients with exacerbations of chronic obstructive pulmonary disease:  
25 497 a prospective randomized, controlled trial. *J Am Geriatr Soc* 2008;56(3):493-500.
- 26 498 (35) Tibaldi V, Isaia G, Scarafiotti C, Gariglio F, Zanocchi M, Bo M, et al. Hospital at home for elderly patients  
27 499 with acute decompensation of chronic heart failure: a prospective randomized controlled trial. *Arch Intern Med*  
28 500 2009;169(17):1569-1575.
- 29 501 (36) Worth A, Tierney AJ. Conducting research interviews with elderly people by telephone. *J Adv Nurs*  
30 502 1993;18(7):1077-1084.
- 31 503 (37) Subbe CP, Kruger M, Rutherford P, Gemmel L. Validation of a modified Early Warning Score in medical  
32 504 admissions. *QJM* 2001 Oct;94(10):521-526.
- 33 505 (38) American College of Emergency Physicians, American Geriatrics Society, Emergency Nurses Association,  
34 506 Society for Academic Emergency Medicine, Geriatric Emergency Department Guidelines Task Force. Geriatric  
35 507 emergency department guidelines. *Ann Emerg Med* 2014 May;63(5):e7-25.
- 36 508 (39) Charlson ME, Pompei P, Ales KL, MacKenzie CR. A new method of classifying prognostic comorbidity in  
37 509 longitudinal studies: development and validation. *J Chronic Dis* 1987;40(5):373-383.
- 38 510 (40) Oud F, de Rooij S, Schuurman T, Duijvelaar K, van Munster B. [Predictive value of the VMS theme 'Frail  
39 511 elderly': delirium, falling and mortality in elderly hospital patients]. *Ned Tijdschr Geneesk* 2014;159:A8491-  
40 512 A8491.
- 41 513 (41) Katz S, Ford AB, Moskowitz RW, Jackson BA, Jaffe MW. Studies of illness in the aged: the index of ADL: a  
42 514 standardized measure of biological and psychosocial function. *JAMA* 1963;185(12):914-919.
- 43 515 (42) Herdman M, Gudex C, Lloyd A, Janssen M, Kind P, Parkin D, et al. Development and preliminary testing of  
44 516 the new five-level version of EQ-5D (EQ-5D-5L). *Quality of Life Research* 2011;20(10):1727-1736.
- 45 517 (43) Makai P, Brouwer WBF, Koopmanschap MA, Nieboer AP. Capabilities and quality of life in Dutch psycho-  
46 518 geriatric nursing homes: an exploratory study using a proxy version of the ICECAP-O. *Quality of Life Research*  
47 519 2012;21(5):801-812.
- 48 520 (44) van Exel NJ, Scholte op Reimer WJ, Brouwer WB, van den Berg B, Koopmanschap MA, van den Bos GA.  
49 521 Instruments for assessing the burden of informal caregiving for stroke patients in clinical practice: a  
50 522 comparison of CSI, CRA, SCQ and self-rated burden. *Clin Rehabil* 2004 Mar;18(2):203-214.
- 51 523 (45) Robinson BC. Validation of a Caregiver Strain Index. *Journal of Gerontology* 1983 May 01;38(3):344-348.
- 52 524 (46) Bouwmans C, Hakkaart-van Roijen L, Koopmanschap M, Krol M, Severens H, Brouwer W. Handleiding iMTA  
53 525 Medical Cost Questionnaire (iMCQ). Rotterdam: iMTA, Erasmus Universiteit Rotterdam, 2013.
- 54 526 (47) Gavinski K, Carnahan R, Weckmann M. Validation of the delirium observation screening scale in a  
55 527 hospitalized older population. *Journal of Hospital Medicine* 2016:n/a-n/a.
- 56 528 (48) Stratton RJ, Hackston A, Longmore D, Dixon R, Price S, Stroud M, et al. Malnutrition in hospital outpatients  
57 529 and inpatients: prevalence, concurrent validity and ease of use of the 'malnutrition universal screening  
58 530 tool' ('MUST') for adults. *Br J Nutr* 2004;92(05):799-808.

- 1  
2  
3 531 (49) Hawker GA, Mian S, Kendzerska T, French M. Measures of adult pain: Visual Analog Scale for Pain (VAS  
4 532 Pain), Numeric Rating Scale for Pain (NRS Pain), McGill Pain Questionnaire (MPQ), Short-Form McGill Pain  
5 533 Questionnaire (SF-MPQ), Chronic Pain Grade Scale (CPGS), Short Form-36 Bodily Pain Scale (SF-36 BPS), and  
6 534 Measure of Intermittent and Constant Osteoarthritis Pain (ICOAP). *Arthritis Care & Research*  
7 535 2011;63(S11):S240-S252.
- 8 536 (50) de Haes, J.C., van Knippenberg, F.C., Neijt JP. Measuring psychological and physical distress in cancer  
9 537 patients: structure and application of the Rotterdam Symptom Checklist. *Br J Cancer* 1990 12;62(6):1034-1038.
- 10 538 (51) MacKnight C, Rockwood K. A Hierarchical Assessment of Balance and Mobility. *Age Ageing* 1995  
11 539 Mar;24(2):126-130.
- 12 540 (52) Attkisson CC, Greenfield TK. The UCSF Client Satisfaction Scales: I. The Client Satisfaction Questionnaire-8.  
13 541 1999.
- 14 542 (53) Reichheld FF. The one number you need to grow. *Harv Bus Rev* 2003;81(12):46-55.
- 15 543 (54) Quinn TJ, Dawson J, Lees JS, Chang T, Walters MR, Lees KR, et al. Time Spent at Home Poststroke: "Home-  
16 544 Time" a Meaningful and Robust Outcome Measure for Stroke Trials. *Stroke* 2008 January 01;39(1):231-233.
- 17 545 (55) Drummond MF, Sculpher MJ, Claxton K, Stoddart GL, Torrance GW. *Methods for the economic evaluation*  
18 546 *of health care programmes*. : Oxford university press; 2015.
- 19 547 (56) Hakkaart-van Roijen L, Van der Linden N, Bouwmans C, Kanters T, Tan S. *Kostenhandleiding. Methodologie*  
20 548 *van kostenonderzoek en referentieprijzen voor economische evaluaties in de gezondheidszorg. In opdracht van*  
21 549 *Zorginstituut Nederland. Geactualiseerde versie 2015*.
- 22 550 (57) Ritchie J, Spencer L. *Qualitative data analysis for applied policy research. The qualitative researcher's*  
23 551 *companion* 2002;573(2002):305-329.
- 24 552 (58) Wet bescherming persoonsgegevens (2000, 6th of July). Available at:  
25 553 <http://wetten.overheid.nl/BWBR0011468/2017-07-01/0/>. Accessed October 25, 2017.
- 26 554 (59) Schulz KF, Altman DG, Moher D. CONSORT 2010 Statement: updated guidelines for reporting parallel  
27 555 group randomised trials. *Trials* 2010;11(1):32.
- 28 556 (60) Raad voor de leefomgeving en infrastructuur. *Langer zelfstandig, een gedeelde opgave van wonen, zorg en*  
29 557 *welzijn. Advies van de Raad voor de Leefomgeving en infrastructuur over langer zelfstandig wonen, 2014.*  
30 558 Available at [http://www.rli.nl/sites/default/files/rli-](http://www.rli.nl/sites/default/files/rli-briefadvieslangerzelfstandigeengedeeldeopgavevanwonenwelzijndef23-113-30_0.pdf)  
31 559 [briefadvieslangerzelfstandigeengedeeldeopgavevanwonenwelzijndef23-113-30\\_0.pdf](http://www.rli.nl/sites/default/files/rli-briefadvieslangerzelfstandigeengedeeldeopgavevanwonenwelzijndef23-113-30_0.pdf) Accessed October  
32 560 25, 2017.
- 33 561 (61) Caplan GA, Sulaiman NS, Mangin DA, Aimonino Ricauda N, Wilson AD, Barclay L. A meta-analysis of  
34 562 "hospital in the home". *Med J Aust* 2012 Nov 5;197(9):512-519.
- 35 563 (62) Porter ME. What Is Value in Health Care? *N Engl J Med* 2010 12/23; 2016/06;363(26):2477-2481.
- 36 564 (63) Bradshaw LE, Goldberg SE, Lewis SA, Whittamore K, Gladman J, Jones R, et al. Six-month outcomes  
37 565 following an emergency hospital admission for older adults with co-morbid mental health problems indicate  
38 566 complexity of care needs. *Age Ageing* 2013;42(5):582-588.
- 39 567 (64) Sayer C. "Time Spent at Home" — A Patient-Defined Outcome. *NEJM Catalyst*. 2016.
- 40 568 (65) Groff AC, Colla CH, Lee TH. Days Spent at Home — A Patient-Centered Goal and Outcome. *N Engl J Med*  
41 569 2016 10/27; 2017/01;375(17):1610-1612.

570

## 571 Figure Legends

572

573 Figure 1: Flowchart of trial design summary

574

575

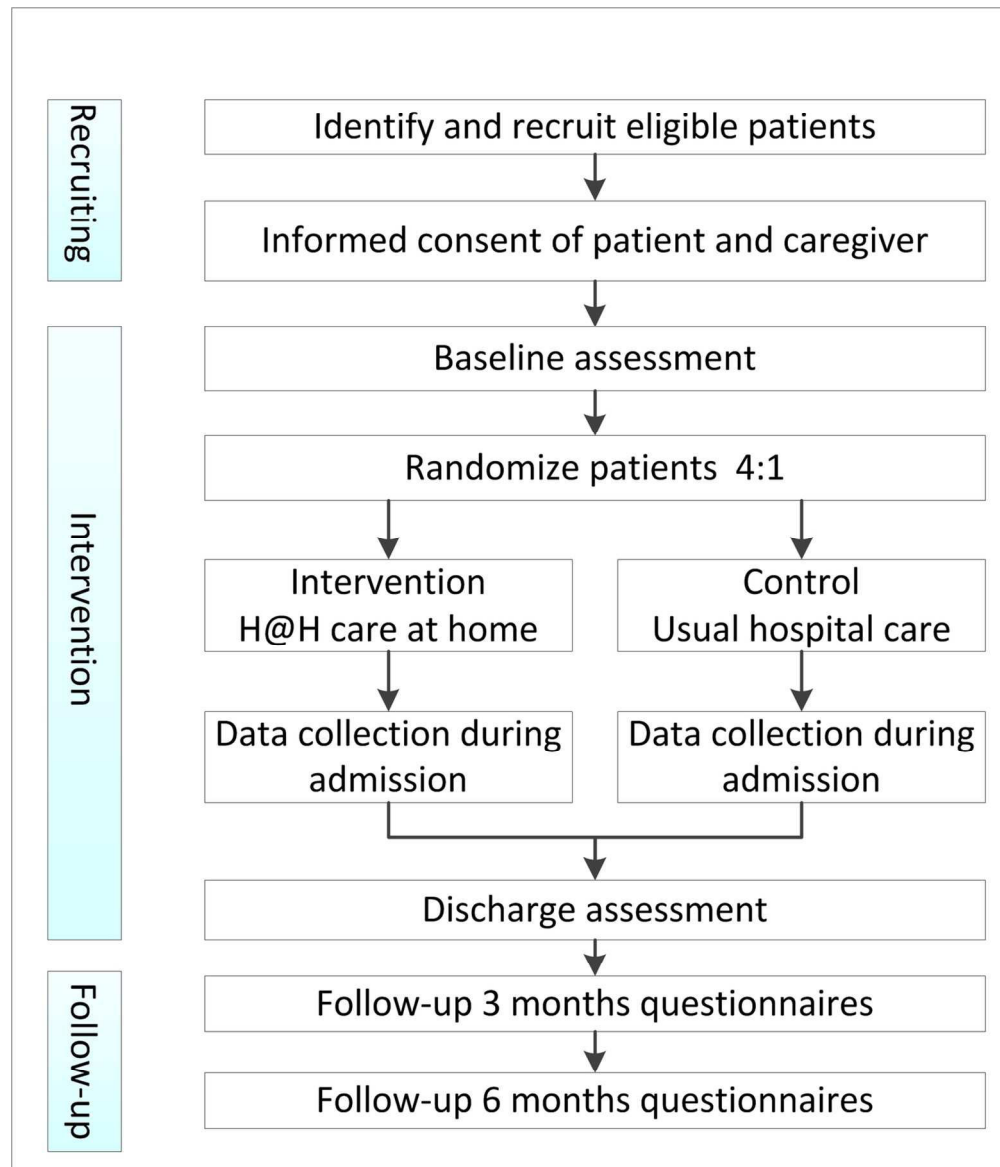

Figure 1: Flowchart of trial design summary

127x148mm (300 x 300 DPI)

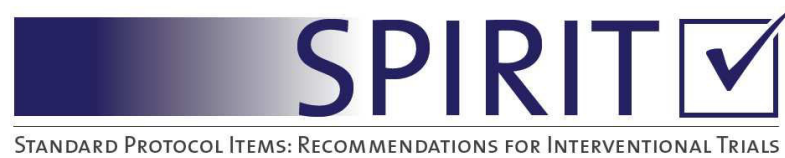

SPIRIT 2013 Checklist: Recommended items to address in a clinical trial protocol and related documents\*

| Section/item                      | Item No | Description                                                                                                                                                                                                                                                                              | Addressed on page number    |
|-----------------------------------|---------|------------------------------------------------------------------------------------------------------------------------------------------------------------------------------------------------------------------------------------------------------------------------------------------|-----------------------------|
| <b>Administrative information</b> |         |                                                                                                                                                                                                                                                                                          |                             |
| Title                             | 1       | Descriptive title identifying the study design, population, interventions, and, if applicable, trial acronym                                                                                                                                                                             | 1                           |
| Trial registration                | 2a      | Trial identifier and registry name. If not yet registered, name of intended registry                                                                                                                                                                                                     | 1                           |
|                                   | 2b      | All items from the World Health Organization Trial Registration Data Set                                                                                                                                                                                                                 | 1, 3, 4, 5, 6, 8, 9, 13, 14 |
| Protocol version                  | 3       | Date and version identifier                                                                                                                                                                                                                                                              | all                         |
| Funding                           | 4       | Sources and types of financial, material, and other support                                                                                                                                                                                                                              | 14                          |
| Roles and responsibilities        | 5a      | Names, affiliations, and roles of protocol contributors                                                                                                                                                                                                                                  | 14                          |
|                                   | 5b      | Name and contact information for the trial sponsor                                                                                                                                                                                                                                       | 14                          |
|                                   | 5c      | Role of study sponsor and funders, if any, in study design; collection, management, analysis, and interpretation of data; writing of the report; and the decision to submit the report for publication, including whether they will have ultimate authority over any of these activities | 14                          |
|                                   | 5d      | Composition, roles, and responsibilities of the coordinating centre, steering committee, endpoint adjudication committee, data management team, and other individuals or groups overseeing the trial, if applicable (see Item 21a for data monitoring committee)                         | n/a                         |

## Introduction

|                                                           |     |                                                                                                                                                                                                                                                                                                                                                                                |       |
|-----------------------------------------------------------|-----|--------------------------------------------------------------------------------------------------------------------------------------------------------------------------------------------------------------------------------------------------------------------------------------------------------------------------------------------------------------------------------|-------|
| Background and rationale                                  | 6a  | Description of research question and justification for undertaking the trial, including summary of relevant studies (published and unpublished) examining benefits and harms for each intervention                                                                                                                                                                             | 3     |
|                                                           | 6b  | Explanation for choice of comparators                                                                                                                                                                                                                                                                                                                                          | 3     |
| Objectives                                                | 7   | Specific objectives or hypotheses                                                                                                                                                                                                                                                                                                                                              | 3     |
| Trial design                                              | 8   | Description of trial design including type of trial (eg, parallel group, crossover, factorial, single group), allocation ratio, and framework (eg, superiority, equivalence, noninferiority, exploratory)                                                                                                                                                                      | 4     |
| <b>Methods: Participants, interventions, and outcomes</b> |     |                                                                                                                                                                                                                                                                                                                                                                                |       |
| Study setting                                             | 9   | Description of study settings (eg, community clinic, academic hospital) and list of countries where data will be collected. Reference to where list of study sites can be obtained                                                                                                                                                                                             | 4     |
| Eligibility criteria                                      | 10  | Inclusion and exclusion criteria for participants. If applicable, eligibility criteria for study centres and individuals who will perform the interventions (eg, surgeons, psychotherapists)                                                                                                                                                                                   | 6     |
| Interventions                                             | 11a | Interventions for each group with sufficient detail to allow replication, including how and when they will be administered                                                                                                                                                                                                                                                     | 7, 8  |
|                                                           | 11b | Criteria for discontinuing or modifying allocated interventions for a given trial participant (eg, drug dose change in response to harms, participant request, or improving/worsening disease)                                                                                                                                                                                 | 7, 8  |
|                                                           | 11c | Strategies to improve adherence to intervention protocols, and any procedures for monitoring adherence (eg, drug tablet return, laboratory tests)                                                                                                                                                                                                                              | n/a   |
|                                                           | 11d | Relevant concomitant care and interventions that are permitted or prohibited during the trial                                                                                                                                                                                                                                                                                  | 9, 10 |
| Outcomes                                                  | 12  | Primary, secondary, and other outcomes, including the specific measurement variable (eg, systolic blood pressure), analysis metric (eg, change from baseline, final value, time to event), method of aggregation (eg, median, proportion), and time point for each outcome. Explanation of the clinical relevance of chosen efficacy and harm outcomes is strongly recommended | 9, 10 |
| Participant timeline                                      | 13  | Time schedule of enrolment, interventions (including any run-ins and washouts), assessments, and visits for participants. A schematic diagram is highly recommended (see Figure)                                                                                                                                                                                               | 10    |

1  
2  
3  
4  
5  
6  
7  
8  
9  
10  
11  
12  
13  
14  
15  
16  
17  
18  
19  
20  
21  
22  
23  
24  
25  
26  
27  
28  
29  
30  
31  
32  
33  
34  
35  
36  
37  
38  
39  
40  
41  
42  
43  
44  
45  
46  
47

Sample size 14 Estimated number of participants needed to achieve study objectives and how it was determined, including clinical and statistical assumptions supporting any sample size calculations 6

Recruitment 15 Strategies for achieving adequate participant enrolment to reach target sample size 5

**Methods: Assignment of interventions (for controlled trials)**

Allocation:

Sequence generation 16a Method of generating the allocation sequence (eg, computer-generated random numbers), and list of any factors for stratification. To reduce predictability of a random sequence, details of any planned restriction (eg, blocking) should be provided in a separate document that is unavailable to those who enrol participants or assign interventions 4

Allocation concealment mechanism 16b Mechanism of implementing the allocation sequence (eg, central telephone; sequentially numbered, opaque, sealed envelopes), describing any steps to conceal the sequence until interventions are assigned 4

Implementation 16c Who will generate the allocation sequence, who will enrol participants, and who will assign participants to interventions 4

Blinding (masking) 17a Who will be blinded after assignment to interventions (eg, trial participants, care providers, outcome assessors, data analysts), and how 4

17b If blinded, circumstances under which unblinding is permissible, and procedure for revealing a participant's allocated intervention during the trial n/a

**Methods: Data collection, management, and analysis**

Data collection methods 18a Plans for assessment and collection of outcome, baseline, and other trial data, including any related processes to promote data quality (eg, duplicate measurements, training of assessors) and a description of study instruments (eg, questionnaires, laboratory tests) along with their reliability and validity, if known. Reference to where data collection forms can be found, if not in the protocol 9, 10, 11

18b Plans to promote participant retention and complete follow-up, including list of any outcome data to be collected for participants who discontinue or deviate from intervention protocols 11

|    |                     |     |                                                                                                                                                                                                                                                                   |     |
|----|---------------------|-----|-------------------------------------------------------------------------------------------------------------------------------------------------------------------------------------------------------------------------------------------------------------------|-----|
| 1  |                     |     |                                                                                                                                                                                                                                                                   |     |
| 2  |                     |     |                                                                                                                                                                                                                                                                   |     |
| 3  | Data management     | 19  | Plans for data entry, coding, security, and storage, including any related processes to promote data quality (eg, double data entry; range checks for data values). Reference to where details of data management procedures can be found, if not in the protocol | 11  |
| 4  |                     |     |                                                                                                                                                                                                                                                                   |     |
| 5  |                     |     |                                                                                                                                                                                                                                                                   |     |
| 6  |                     |     |                                                                                                                                                                                                                                                                   |     |
| 7  | Statistical methods | 20a | Statistical methods for analysing primary and secondary outcomes. Reference to where other details of the statistical analysis plan can be found, if not in the protocol                                                                                          | 12  |
| 8  |                     |     |                                                                                                                                                                                                                                                                   |     |
| 9  |                     |     |                                                                                                                                                                                                                                                                   |     |
| 10 |                     | 20b | Methods for any additional analyses (eg, subgroup and adjusted analyses)                                                                                                                                                                                          | n/a |
| 11 |                     |     |                                                                                                                                                                                                                                                                   |     |
| 12 |                     | 20c | Definition of analysis population relating to protocol non-adherence (eg, as randomised analysis), and any statistical methods to handle missing data (eg, multiple imputation)                                                                                   | n/a |
| 13 |                     |     |                                                                                                                                                                                                                                                                   |     |
| 14 |                     |     |                                                                                                                                                                                                                                                                   |     |

### 15 **Methods: Monitoring**

|    |                 |     |                                                                                                                                                                                                                                                                                                                                       |     |
|----|-----------------|-----|---------------------------------------------------------------------------------------------------------------------------------------------------------------------------------------------------------------------------------------------------------------------------------------------------------------------------------------|-----|
| 16 |                 |     |                                                                                                                                                                                                                                                                                                                                       |     |
| 17 | Data monitoring | 21a | Composition of data monitoring committee (DMC); summary of its role and reporting structure; statement of whether it is independent from the sponsor and competing interests; and reference to where further details about its charter can be found, if not in the protocol. Alternatively, an explanation of why a DMC is not needed | 12  |
| 18 |                 |     |                                                                                                                                                                                                                                                                                                                                       |     |
| 19 |                 |     |                                                                                                                                                                                                                                                                                                                                       |     |
| 20 |                 |     |                                                                                                                                                                                                                                                                                                                                       |     |
| 21 |                 |     |                                                                                                                                                                                                                                                                                                                                       |     |
| 22 |                 | 21b | Description of any interim analyses and stopping guidelines, including who will have access to these interim results and make the final decision to terminate the trial                                                                                                                                                               | 12  |
| 23 |                 |     |                                                                                                                                                                                                                                                                                                                                       |     |
| 24 |                 |     |                                                                                                                                                                                                                                                                                                                                       |     |
| 25 | Harms           | 22  | Plans for collecting, assessing, reporting, and managing solicited and spontaneously reported adverse events and other unintended effects of trial interventions or trial conduct                                                                                                                                                     | 12  |
| 26 |                 |     |                                                                                                                                                                                                                                                                                                                                       |     |
| 27 |                 |     |                                                                                                                                                                                                                                                                                                                                       |     |
| 28 | Auditing        | 23  | Frequency and procedures for auditing trial conduct, if any, and whether the process will be independent from investigators and the sponsor                                                                                                                                                                                           | n/a |
| 29 |                 |     |                                                                                                                                                                                                                                                                                                                                       |     |
| 30 |                 |     |                                                                                                                                                                                                                                                                                                                                       |     |
| 31 |                 |     |                                                                                                                                                                                                                                                                                                                                       |     |

### 32 **Ethics and dissemination**

|    |                          |    |                                                                                                                                                                                                                                  |    |
|----|--------------------------|----|----------------------------------------------------------------------------------------------------------------------------------------------------------------------------------------------------------------------------------|----|
| 33 |                          |    |                                                                                                                                                                                                                                  |    |
| 34 | Research ethics approval | 24 | Plans for seeking research ethics committee/institutional review board (REC/IRB) approval                                                                                                                                        | 12 |
| 35 |                          |    |                                                                                                                                                                                                                                  |    |
| 36 |                          |    |                                                                                                                                                                                                                                  |    |
| 37 | Protocol amendments      | 25 | Plans for communicating important protocol modifications (eg, changes to eligibility criteria, outcomes, analyses) to relevant parties (eg, investigators, REC/IRBs, trial participants, trial registries, journals, regulators) | 12 |
| 38 |                          |    |                                                                                                                                                                                                                                  |    |
| 39 |                          |    |                                                                                                                                                                                                                                  |    |
| 40 |                          |    |                                                                                                                                                                                                                                  |    |
| 41 |                          |    |                                                                                                                                                                                                                                  |    |
| 42 |                          |    |                                                                                                                                                                                                                                  |    |
| 43 |                          |    |                                                                                                                                                                                                                                  |    |
| 44 |                          |    |                                                                                                                                                                                                                                  |    |
| 45 |                          |    |                                                                                                                                                                                                                                  |    |
| 46 |                          |    |                                                                                                                                                                                                                                  |    |
| 47 |                          |    |                                                                                                                                                                                                                                  |    |

|    |                               |     |                                                                                                                                                                                                                                                                                     |                      |
|----|-------------------------------|-----|-------------------------------------------------------------------------------------------------------------------------------------------------------------------------------------------------------------------------------------------------------------------------------------|----------------------|
| 1  |                               |     |                                                                                                                                                                                                                                                                                     |                      |
| 2  |                               |     |                                                                                                                                                                                                                                                                                     |                      |
| 3  | Consent or assent             | 26a | Who will obtain informed consent or assent from potential trial participants or authorised surrogates, and how (see Item 32)                                                                                                                                                        | 5                    |
| 4  |                               |     |                                                                                                                                                                                                                                                                                     |                      |
| 5  |                               |     |                                                                                                                                                                                                                                                                                     |                      |
| 6  |                               | 26b | Additional consent provisions for collection and use of participant data and biological specimens in ancillary studies, if applicable                                                                                                                                               | n/a                  |
| 7  |                               |     |                                                                                                                                                                                                                                                                                     |                      |
| 8  |                               |     |                                                                                                                                                                                                                                                                                     |                      |
| 9  | Confidentiality               | 27  | How personal information about potential and enrolled participants will be collected, shared, and maintained in order to protect confidentiality before, during, and after the trial                                                                                                | 10                   |
| 10 |                               |     |                                                                                                                                                                                                                                                                                     |                      |
| 11 |                               |     |                                                                                                                                                                                                                                                                                     |                      |
| 12 | Declaration of interests      | 28  | Financial and other competing interests for principal investigators for the overall trial and each study site                                                                                                                                                                       | 13                   |
| 13 |                               |     |                                                                                                                                                                                                                                                                                     |                      |
| 14 |                               |     |                                                                                                                                                                                                                                                                                     |                      |
| 15 | Access to data                | 29  | Statement of who will have access to the final trial dataset, and disclosure of contractual agreements that limit such access for investigators                                                                                                                                     | 10                   |
| 16 |                               |     |                                                                                                                                                                                                                                                                                     |                      |
| 17 |                               |     |                                                                                                                                                                                                                                                                                     |                      |
| 18 | Ancillary and post-trial care | 30  | Provisions, if any, for ancillary and post-trial care, and for compensation to those who suffer harm from trial participation                                                                                                                                                       | Available on request |
| 19 |                               |     |                                                                                                                                                                                                                                                                                     |                      |
| 20 |                               |     |                                                                                                                                                                                                                                                                                     |                      |
| 21 | Dissemination policy          | 31a | Plans for investigators and sponsor to communicate trial results to participants, healthcare professionals, the public, and other relevant groups (eg, via publication, reporting in results databases, or other data sharing arrangements), including any publication restrictions | 12                   |
| 22 |                               |     |                                                                                                                                                                                                                                                                                     |                      |
| 23 |                               |     |                                                                                                                                                                                                                                                                                     |                      |
| 24 |                               |     |                                                                                                                                                                                                                                                                                     |                      |
| 25 |                               | 31b | Authorship eligibility guidelines and any intended use of professional writers                                                                                                                                                                                                      | 13                   |
| 26 |                               |     |                                                                                                                                                                                                                                                                                     |                      |
| 27 |                               | 31c | Plans, if any, for granting public access to the full protocol, participant-level dataset, and statistical code                                                                                                                                                                     | n/a                  |
| 28 |                               |     |                                                                                                                                                                                                                                                                                     |                      |
| 29 | <b>Appendices</b>             |     |                                                                                                                                                                                                                                                                                     |                      |
| 30 |                               |     |                                                                                                                                                                                                                                                                                     |                      |
| 31 | Informed consent materials    | 32  | Model consent form and other related documentation given to participants and authorised surrogates                                                                                                                                                                                  | Available on request |
| 32 |                               |     |                                                                                                                                                                                                                                                                                     |                      |
| 33 |                               |     |                                                                                                                                                                                                                                                                                     |                      |
| 34 | Biological specimens          | 33  | Plans for collection, laboratory evaluation, and storage of biological specimens for genetic or molecular analysis in the current trial and for future use in ancillary studies, if applicable                                                                                      | n/a                  |
| 35 |                               |     |                                                                                                                                                                                                                                                                                     |                      |
| 36 |                               |     |                                                                                                                                                                                                                                                                                     |                      |

37 \*It is strongly recommended that this checklist be read in conjunction with the SPIRIT 2013 Explanation & Elaboration for important clarification on the items.  
 38 Amendments to the protocol should be tracked and dated. The SPIRIT checklist is copyrighted by the SPIRIT Group under the Creative Commons  
 39 "[Attribution-NonCommercial-NoDerivs 3.0 Unported](https://creativecommons.org/licenses/by-nc-nd/3.0/)" license.  
 40



# BMJ Open

## Hospital at Home care for older patients with cognitive impairment: A protocol for a randomized controlled feasibility trial

|                                 |                                                                                                                                                                                                                                                                                                                                                                                                                                                                                                                                                                                                                                                                                                                                                                                                           |
|---------------------------------|-----------------------------------------------------------------------------------------------------------------------------------------------------------------------------------------------------------------------------------------------------------------------------------------------------------------------------------------------------------------------------------------------------------------------------------------------------------------------------------------------------------------------------------------------------------------------------------------------------------------------------------------------------------------------------------------------------------------------------------------------------------------------------------------------------------|
| Journal:                        | <i>BMJ Open</i>                                                                                                                                                                                                                                                                                                                                                                                                                                                                                                                                                                                                                                                                                                                                                                                           |
| Manuscript ID                   | bmjopen-2017-020332.R2                                                                                                                                                                                                                                                                                                                                                                                                                                                                                                                                                                                                                                                                                                                                                                                    |
| Article Type:                   | Protocol                                                                                                                                                                                                                                                                                                                                                                                                                                                                                                                                                                                                                                                                                                                                                                                                  |
| Date Submitted by the Author:   | 08-Feb-2018                                                                                                                                                                                                                                                                                                                                                                                                                                                                                                                                                                                                                                                                                                                                                                                               |
| Complete List of Authors:       | Pouw, Maaïke; University of Groningen, University Medical Center Groningen, Department of Geriatrics; Martini Hospital, Department of Internal Medicine<br>Calf, Agneta; University of Groningen, University Medical Center Groningen, Department of Geriatrics<br>van Munster, Barbara; University of Groningen, University Medical Center Groningen, Department of Geriatrics; Gelre Hospitals, Department of Geriatrics<br>ter Maaten, Jan; University of Groningen, University Medical Center Groningen, Department of Internal Medicine, Emergency Department<br>Smidt, Nynke; University of Groningen, University Medical Center Groningen, Department of Epidemiology, The Netherlands<br>De Roolj, Sophia; University of Groningen, University Medical Center Groningen, Department of Geriatrics |
| <b>Primary Subject Heading</b>: | Geriatric medicine                                                                                                                                                                                                                                                                                                                                                                                                                                                                                                                                                                                                                                                                                                                                                                                        |
| Secondary Subject Heading:      | Patient-centred medicine                                                                                                                                                                                                                                                                                                                                                                                                                                                                                                                                                                                                                                                                                                                                                                                  |
| Keywords:                       | Dementia < NEUROLOGY, Organisation of health services < HEALTH SERVICES ADMINISTRATION & MANAGEMENT, GERIATRIC MEDICINE, Delirium & cognitive disorders < PSYCHIATRY, INTERNAL MEDICINE                                                                                                                                                                                                                                                                                                                                                                                                                                                                                                                                                                                                                   |
|                                 |                                                                                                                                                                                                                                                                                                                                                                                                                                                                                                                                                                                                                                                                                                                                                                                                           |

SCHOLARONE™  
Manuscripts

**Public title**

Hospital at Home care for older patients with cognitive impairment and an acute medical illness

**Scientific title**

Hospital at Home care for older patients with cognitive impairment: A protocol for a randomized controlled feasibility trial

**Acronym**

H@H

Maaïke A Pouw,<sup>1,2</sup> Agneta H Calf,<sup>1</sup> Barbara C van Munster,<sup>1,3</sup> Jan C ter Maaten,<sup>4</sup> Nynke Smidt,<sup>1,5</sup> & Sophia E de Rooij<sup>1</sup>

**Corresponding author:** m.a.pouw@umcg.nl. University Center of Geriatric Medicine, University Medical Center Groningen. Hanzeplein 1, Postbus 30 001, 9700 RB Groningen

**Authors' affiliations**

<sup>1</sup> Department of Geriatrics, University Medical Center Groningen, University of Groningen, Groningen, the Netherlands

<sup>2</sup> Department of Internal Medicine, Martini Hospital, Groningen, The Netherlands.

<sup>3</sup> Department of Geriatrics, Gelre Hospitals, Apeldoorn, The Netherlands.

<sup>4</sup> Department of Internal Medicine, Emergency Department, University Medical Center Groningen, University of Groningen, Groningen, The Netherlands

<sup>5</sup> Department of Epidemiology, University of Groningen, University Medical Center Groningen, Groningen, The Netherlands.

**Keywords:** Dementia, Cognition disorders, Aged, Home Care Services; Hospital-Based, Hospital at Home

**Word count:** 3985

1  
2  
3 35 **Abstract**

4 36 **INTRODUCTION:** An acute hospital admission is a stressful life event for older people, particularly for  
5 37 those with cognitive impairment. The hospitalisation is often complicated by hospital-associated  
6 38 geriatric syndromes, including delirium and functional loss, leading to functional decline and nursing  
7 39 home admission. Hospital at Home care aims to avoid hospitalisation-associated adverse outcomes  
8 40 in older patients with cognitive impairment by providing hospital care in the patient's own  
9 41 environment.

10 42 **METHODS AND ANALYSIS:** This randomized, non-blinded feasibility trial aims to assess the feasibility  
11 43 of conducting a randomized controlled trial in terms of the recruitment, use and acceptability of  
12 44 Hospital at Home care for older patients with cognitive impairment. The quality of care will be  
13 45 evaluated and the advantages and disadvantages of the Hospital at Home care program compared to  
14 46 usual hospital care. Eligible patients will be randomized either to Hospital at Home care in their own  
15 47 environment or usual hospital care. The intervention consists of hospital level care provided at  
16 48 patients' homes, including visits from health care professionals, diagnostics (laboratory tests, blood  
17 49 cultures) and treatment. The control group will receive usual hospital care. Measurements will be  
18 50 conducted at baseline, during admission, at discharge and at three and six months after the baseline  
19 51 assessment.

20 52 **ETHICS AND DISSEMINATION:** Institutional ethics approval has been granted. The findings will be  
21 53 disseminated through public lectures, professional and scientific conferences, as well as peer-  
22 54 reviewed journal articles. The study findings will contribute to knowledge on the implementation of  
23 55 Hospital at Home care for older patients with cognitive disorders. The results will be used to inform  
24 56 and support strategies to deliver eligible care to older patients with cognitive impairment.

25 57 **TRIAL REGISTRATION:** This study was registered with the NTR registry (NTR6581) on 26 July 2017.  
26 58  
27  
28  
29  
30  
31  
32  
33  
34  
35  
36  
37  
38  
39  
40  
41  
42  
43  
44  
45  
46  
47  
48  
49  
50  
51  
52  
53  
54  
55  
56  
57  
58  
59  
60

## Strengths and limitations of this study

---

- This study addresses the feasibility of Hospital at Home care in patients with cognitive impairment, a patient population that is often excluded from participation in scientific research
- A process evaluation facilitates the investigation of factors that influence the experiences and perceptions of all persons involved in Hospital at Home care
- Stakeholders were involved in the development of the design of the study which will support the implementation of Hospital at Home care and a future trial
- Because of a limited sample size due to the study being centered on feasibility, results will not show effectiveness of Hospital at Home care compared to usual hospital care.

## Introduction

---

### Background

An acute hospital admission is a stressful life event, particularly for older people. In addition to the stress of an acute illness, the hospital admission itself contributes to this stress.<sup>1</sup> Older hospitalized patients are often deprived of sleep, and they spend an average of 20 of every 24 hours in bed, they become poorly nourished, and experience sensory deprivation or overstimulation, resulting in confusion.<sup>2-5</sup> These adverse effects of hospitalization contribute to the occurrence of geriatric conditions, such as delirium, functional decline, falls, incontinence, hospital acquired infections and pressure injuries.<sup>6-9</sup> Adverse effects of hospitalization occur more easily in older people, particularly in those who are already frail, a growing portion of the worldwide ageing population.<sup>10,11</sup> Frailty is a state of increased vulnerability to external stressors resulting from aging-associated declines in reserve and function across multiple physiologic systems.<sup>10</sup> Cognitive impairment (i.e., dementia) is an important contributor to frailty in older people.<sup>12</sup> Cognitively impaired older people are more likely to become hospitalised and once admitted, they experience longer stays than their peers without cognitive impairment.<sup>13-15</sup> The combination of hospitalization and cognitive impairment in older people is associated with further functional and cognitive declines and higher mortality rates, and it leads to more discharges to long-term care facilities.<sup>16,17</sup> The prevalence and worldwide burden of cognitive impairment will continue to increase as the average life expectancy increases.<sup>18</sup> The total number of people with cognitive impairment is estimated to be 75.6 million in 2030 and will nearly triple in 2050 to 135.5 million.<sup>19</sup> An increase in the number of hospital admissions of older people with cognitive impairment and an increase in number of hospitalisation-associated adverse outcomes are therefore to be expected.

1  
2  
3 92 Besides adverse outcomes of hospitalization, many older people and their caregivers do not  
4 93 necessarily desire a hospital admission in case of an acute illness or exacerbation of a chronic illness.  
5  
6 94 Fried et al. (2000) have studied the preferences of community-dwelling persons 65 years of age and  
7  
8 95 older who were hospitalized with a primary diagnosis of congestive heart failure, chronic obstructive  
9  
10 96 pulmonary disease or pneumonia. The authors reported that over 50% of older patients preferred to  
11  
12 97 receive hospital treatment at home, because they felt that their homes were more comfortable.<sup>20</sup> In  
13  
14 98 the treatment preferences of seriously ill patients 60 years of age and older, the likelihood of  
15  
16 99 cognitive and functional impairment as an adverse outcome of the treatment was weighed in the  
17  
18 100 decision-making process. There was a substantial decrease in the number of participants who opted  
19  
20 101 for treatment if the likelihood of impairment after treatment was 50% or higher.<sup>21</sup>

21  
22 102  
23 103 Hospital at Home care could provide an effective alternative to inpatient care for a select group of  
24  
25 104 elderly patients now requiring hospitalisation. Hospital at Home care is coordinated, multidisciplinary  
26  
27 105 care in the homes of people who would otherwise be admitted to the hospital. Hospital at Home  
28  
29 106 care is an accepted alternative to inpatient hospital level care in several countries (e.g., the United  
30  
31 107 States, Australia, Italy and the United Kingdom) but not yet in the Netherlands.<sup>22</sup> Since the 1990s,  
32  
33 108 Hospital at Home has been evaluated in (older) persons with various acute medical conditions, such  
34  
35 109 as heart failure, exacerbations in chronic obstructive pulmonary disease (COPD) and infections (e.g.,  
36  
37 110 cellulitis, pneumonia).<sup>22</sup> In systematic reviews comparing alternative strategies to inpatient  
38  
39 111 hospitalization, lower or equal mortality rates and return hospitalization rates (i.e., subsequent  
40  
41 112 admissions after discharge) were found for Hospital at Home care, there was a lower incidence of  
42  
43 113 delirium, and there was a positive effect on patient and caregiver satisfaction.<sup>22-24</sup> Only one  
44  
45 114 completed trial conducted in Italy included 109 patients with cognitive impairment (i.e. dementia),  
46  
47 115 Tibaldi et al. reported a positive effect of a Hospital at Home intervention on behavioural  
48  
49 116 disturbances and caregiver stress in patients with dementia.<sup>25</sup> Results of a still on-going trial including  
50  
51 117 people with i.a. cognitive impairment in the United Kingdom, will follow in the near future.<sup>26</sup>

52  
53 118 Whether Hospital at Home care provides a suitable alternative with regard to other outcomes as  
54  
55 119 patient satisfaction, quality of care, hospitalisation-associated adverse events and costs in older  
56  
57 120 people with cognitive impairment remains unclear and further research is needed. Therefore, our  
58  
59 121 primary aim is to investigate the feasibility of a Hospital at Home care program for older patients  
60  
122 with cognitive impairment in terms of the patient recruitment, use and acceptability, and secondly to  
123 investigate the advantages and disadvantages of Hospital at Home care compared to usual hospital  
124 care from different perspectives.

125  
126 Objectives of this study are:

- 1  
2  
3 127 1) To assess the participation rate of the Hospital at Home trial among patients 65 years and older  
4 128 with cognitive impairment, acute illness, and emergency hospital admission. What are the reasons  
5  
6 129 for non-participation?  
7  
8 130 2) To assess the potential advantages and disadvantages of Hospital at Home care and usual hospital  
9 131 care for the patients, caregivers and Dutch medical health system.  
10  
11 132 3) To assess the feasibility of Hospital at Home care in terms of the quality of care with regard to  
12 133 geriatric syndromes, institutionalization, mortality, total days with urinary catheter, length of stay (in  
13 134 the hospital or in Hospital at Home care) and timing/intensity of the contact with health care  
14  
15 135 professionals.

## 136 **Methods and analysis**

---

### 137 138 **Trial design**

139 The design is a randomized controlled feasibility trial and will utilize a process evaluation. This study  
140 will be conducted at the medical emergency department (ED) of the academic hospital of the  
141 University Medical Center of Groningen in the Netherlands and will evaluate cognitively impaired  
142 older patients who are in need of acute hospital care. Figure 1 shows the trial design summary.  
143 Participants will be randomized to either Hospital at Home care or usual hospital care in a 4:1 ratio,  
144 respectively. Patients will be randomized using a computerized random number generator  
145 (<http://www.randomization.com>), including block randomization.  
146 An independent research nurse who is not involved in the patient care will complete the baseline  
147 assessment and allocate the participants (using sealed sequenced envelopes) into the Hospital at  
148 Home care (intervention) or usual hospital care group (control). The research nurse will not be aware  
149 of the randomization method. The participants, health care professionals and research staff will not  
150 be blinded to the intervention. The reporting of the design of this trial protocol is in accordance with  
151 the SPIRIT 2013 statement for clinical trial protocols.<sup>27</sup>

152

153

154 **Figure 1**155 **Study population**

156 Patients 65 years of age and older who are admitted to the medical emergency department (ED) will  
157 be identified by the ED staff as potential eligible patients. Subsequently, the ED staff will inform the  
158 research nurse. The research nurse will complete the eligibility criteria checklist (table 1). The  
159 research nurse will ask the patient and their informal caregiver (i.e., partner, child, relative, friend)  
160 for their willingness to participate in the study and to provide written informed consent. The patient  
161 and informal caregiver will need to both sign the informed consent form before the patient can  
162 participate in the H@H trial.

163 An evaluation to assess the mental capacity is conducted by the involved ED staff in the setting of the  
164 emergency department assessment. If the participant lacks the capacity to consent (mentally  
165 incapacitated), and an informal caregiver (i.e., partner, child, friend) is present, this informal  
166 caregiver will be asked to act as a personal consultee. The personal consultee will determine whether  
167 he or she believes that participation in the study would be in accordance with the values and  
168 interests of the individual and will subsequently sign the patient's informed consent form.

169

view only

170 **Table 1** Patient eligibility criteria for participation in Hospital at Home trial

| Inclusion criteria                                                                                                                                                                                                                                                                                                                                                                                                                                                                                                                                                                                                                                                                                                                                                                                                                                                                                                                                                                                                                                                                                                                                    | Exclusion criteria                                                                                                                                                                                                                                                                                                                                                                                                                                                                                                                                                                                                                                                                                                               |
|-------------------------------------------------------------------------------------------------------------------------------------------------------------------------------------------------------------------------------------------------------------------------------------------------------------------------------------------------------------------------------------------------------------------------------------------------------------------------------------------------------------------------------------------------------------------------------------------------------------------------------------------------------------------------------------------------------------------------------------------------------------------------------------------------------------------------------------------------------------------------------------------------------------------------------------------------------------------------------------------------------------------------------------------------------------------------------------------------------------------------------------------------------|----------------------------------------------------------------------------------------------------------------------------------------------------------------------------------------------------------------------------------------------------------------------------------------------------------------------------------------------------------------------------------------------------------------------------------------------------------------------------------------------------------------------------------------------------------------------------------------------------------------------------------------------------------------------------------------------------------------------------------|
| <ul style="list-style-type: none"> <li>▪ Age 65 years of age and older</li> <li>▪ Cognitive impairment, i.e. dementia, delirium or other cause of cognitive impairment, and either:               <ul style="list-style-type: none"> <li>○ previously diagnosed or documented in the medical records or</li> <li>○ identified by the ED-clinician (e.g., with the 4AT-test and/or Six item cognitive impairment test)<sup>28-30</sup></li> </ul> </li> <li>▪ Presented at the ED with a defined acute illness</li> <li>▪ Required hospital admission, according to the attending ED physician but not expected to require emergency interventions               <ul style="list-style-type: none"> <li>○ Modified Early Warning Score (MEWS) <math>\leq 2</math> points<sup>31-33</sup></li> </ul> </li> <li>▪ Living in hospital's catchment area (&lt; 25 km)</li> <li>▪ Informal caregiver is present and able to understand and perform instructions and consented to participate in the trial</li> <li>▪ Home suitable for Hospital at Home care (available informal caregiver, running water, adequate heating, safety)<sup>30</sup></li> </ul> | <ul style="list-style-type: none"> <li>▪ Previously enrolled</li> <li>▪ Hospitalized within the seven days preceding ED presentation</li> <li>▪ Nursing home residents or awaiting a nursing home place on an active waiting list (excluding so-called sleeping waiting list candidates)<sup>27</sup></li> <li>▪ Additional care needed               <ul style="list-style-type: none"> <li>○ Required surgical assessment</li> <li>○ Suspected acute coronary syndrome or cardiac arrhythmia<sup>31</sup></li> <li>○ Dialysis dependent patients<sup>31</sup></li> <li>○ Expected terminal events<sup>31</sup> or in need of diagnostic or palliative care due to oncological or haematological illness</li> </ul> </li> </ul> |

171 ED= Emergency department

172

173 **Sample size of study population**

174 Based on the numbers available from the emergency department (ED) of the University Medical  
 175 Center Groningen, the Netherlands, we calculated that an average of 3990 older patients 65 years  
 176 and over is admitted to our medical ED each year. The Hospital at Home trial will be introduced  
 177 during working hours, which provides an estimated 1900 patients per year. Not all 1900 patients will  
 178 be eligible for study inclusion. Based on screening of ED medical records, approximately 15% of the  
 179 patients meet the eligibility criteria for Hospital at Home care, resulting in 285 eligible persons per  
 180 year. In recent randomized controlled trials (RCTs) of Hospital at Home care in Italy, 54% and 57% of  
 181 the eligible patients was willing to participate and gave informed consent.<sup>34,35</sup> We presume a similar  
 182 consent rate of 50%, as described in these previous clinical trials, and expect for 143 patients to be  
 183 included.

184 **Study procedures**

185 After (written) informed consent is obtained, all participants will complete two brief tests to assess  
 186 cognitive impairment, and the participant and caregiver will complete the baseline assessment.  
 187 Subsequently, randomization takes place to either (a) the Hospital at Home care-intervention,  
 188 translocation of care from the hospital to a participants' home or (b) the control group, usual  
 189 hospital care. All care will be delivered according to hospital protocols, current regulations and



1  
2  
3 190 guidelines and, if needed, described in the standard operating procedures (SOPs). If no informed  
4 191 consent is given by either the patient or the caregiver, the reasons for non-participation, date of  
5  
6 192 birth, sex of the patient and the relationship between patient and caregiver will be reported.  
7

## 8 193 **Intervention**

### 9 194 **Hospital at Home care**

10 195 Hospital at Home care will be delivered by a multidisciplinary team consisting of a physician, nurse,  
11  
12 196 pharmacist and physiotherapist. Depending on the participants' needs, other disciplines (e.g., a  
13  
14 197 dietician, occupational therapist or social services) can be involved in the Hospital at Home care. The  
15  
16 198 day-to-day care will be provided by the nurse and physician visiting the participant. The Hospital at  
17  
18 199 Home care team works under the responsibility of the medical specialist in the hospital, and 24/7  
19  
20 200 consultation of the expertise and services of the hospital is part of the protocol.  
21

22  
23 202 The participants allocated to Hospital at Home care will receive hospital level care in their own  
24  
25 203 homes. After a stay of one night in the hospital, while the Hospital at Home care arrangements are  
26  
27 204 being made, the participant will be transferred home and receive Hospital at Home care. The  
28  
29 205 Hospital at Home nurse is responsible for the day-to-day care and will be present upon arrival of the  
30  
31 206 participant at his/her residence. Hospital at Home care is described in the care protocols including  
32  
33 207 SOPs and could include intravenous therapy (e.g., antibiotics, fluid, and/or diuretics), oxygen therapy,  
34  
35 208 and/or nebulizer, indwelling urine catheter or a nasopharyngeal food tube. After the care intake and  
36  
37 209 a period of direct nursing supervision, the participant will receive intermittent nursing visits daily  
38  
39 210 (starting with 3x/day), including weekends and public holidays. The Hospital at Home physician will  
40  
41 211 make a home visit every day (excl. weekends). The Hospital at Home physician and nurse will be  
42  
43 212 available for emergency visits. The participant will receive a medical alert device in the house, with a  
44  
45 213 24/7 connection to an on-call service. Alert instructions will be explained to the participant and  
46  
47 214 caregiver. A physiotherapist will visit the participant at home to evaluate any problems with balance  
48  
49 215 and/or walking and immobility. The Hospital at Home team works under the supervision of the  
50  
51 216 hospital medical specialist. Daily screenings and measurements will be recorded in a Hospital at  
52  
53 217 Home record, which stays with the participant. Diagnostic procedures and therapeutics that cannot  
54  
55 218 wait and are not available at home, such as endoscopy or CT-scan, will be arranged through brief  
56  
57 219 visits to the hospital. The participant will be 'admitted' to the Hospital at Home care for as long as  
58  
59 220 indicated.

### 53 221 *Discharge from Hospital at Home*

54 222 If the participant recovers to such an extent that hospital level care is no longer needed, the  
55  
56 223 participant will be discharged from the Hospital at Home care program, similar to the discharge  
57

1  
2  
3 224 procedure when the participant would receive usual hospital care. Hospital at Home care will end  
4 225 with discharge planning with the participant, family, Hospital at Home physician and nurse. The  
5 226 discharge plan includes follow-up appointments (e.g., at the hospital or general practitioner),  
6 227 information on medication, warning signs and symptoms and an on-going management plan. All  
7 228 hospital-related care equipment will be removed from the participants' house, and arrangements  
8 229 with homecare agencies and/or paramedical staff will be reviewed and adjusted to the current  
9 230 situation.

### 14 231 **Hospital care as usual**

15 232 Participants allocated to the control arm will be admitted to a hospital ward and receive usual  
16 233 hospital care. After admission and intake on the ward, the participant will receive intermittent visits  
17 234 from the ward nurse multiple times a day. The ward physician will visit once every day (excl.  
18 235 weekends), with extra visits provided if needed. An emergency alert device, through which nurses  
19 236 and physician can be contacted, will be placed next to the bed. A physiotherapist will visit the  
20 237 participant at the ward to address problems with balance and/or walking and immobility. Depending  
21 238 on the participants' needs, other disciplines (e.g., a dietician, occupational therapist or social  
22 239 services) can be involved in the hospital care. The medical record is the hospital record and  
23 240 additional H@H research forms will be added to this record for research purposes. The participant  
24 241 will be admitted to the hospital for as long as indicated.

25 242

### 26 243 *Hospital discharge*

27 244 If the participant recovers to such an extent that hospital level care is no longer needed, the  
28 245 participant will be discharged from the hospital after discharge planning with the participant, family,  
29 246 physician and nurse. The discharge plan includes follow-up appointments (e.g., at the hospital or  
30 247 general practitioner), information on medication, warning signs and symptoms and an on-going  
31 248 management plan. Arrangements with homecare agencies and/or paramedical staff will be reviewed  
32 249 and adjusted to the current situation.

33 250

### 34 251 **Follow-up**

35 252 At three and six months following randomization, all participants will be contacted for an interview  
36 253 by telephone<sup>36</sup> or a face-to-face interview, if needed. The participants will be allowed to receive  
37 254 support with these questions from their relatives or informal caregivers. An interview will require a  
38 255 maximum of 30 minutes. In case of institutionalization or mortality, this event will be recorded.  
39 256 Additionally, information on hospital readmission and length of stay will be collected from the

1  
2  
3 257 hospital administration system and health insurers. Mortality and nursing home placements will be  
4 258 collected from registries from the general practitioner and municipalities.  
5

6 259

7 260 **Timing of measurements and outcome measures**

8 261

9 262 Data will be collected at baseline at the emergency department, during admission (in Hospital at  
10 263 Home or hospital), at discharge and at three and six months following randomization, plus or minus  
11 264 two weeks. An overview of the timing of measurements and outcome measures are shown in Table  
12 265 2.  
13  
14 266

15 267

16 268 *Feasibility*

17 269 For the participation rates, the proportion of participants per step will be calculated. The reasons for  
18 270 non-participation and data concerning the characteristics of non-participants will be collected. We  
19 271 consider the participation rate feasible when it is similar to the participation rate as is described in  
20 272 previous RCTs and around 50% of the eligible patients will consent to participate.<sup>34,35</sup> Quality of care  
21 273 will be measured by collecting data on patient, institutionalization (e.g., to the hospital or nursing  
22 274 home), mortality, ADL-functioning, prevalence of hospitalisation-associated geriatric syndromes, the  
23 275 length of stay in the hospital or Hospital at Home care program and contact with health care  
24 276 professionals. The study is considered feasible if the quality of care of Hospital at Home care on these  
25 277 measurements is non- inferior to usual hospital care.  
26  
27  
28  
29  
30  
31  
32  
33  
34  
35  
36  
37  
38  
39  
40  
41  
42  
43  
44  
45  
46  
47  
48  
49  
50  
51  
52  
53  
54  
55  
56  
57  
58  
59  
60

278 **Table 2** Overview of the content and description of outcome measures and timing of measurements

|                                                     | Description and instrument                                                                                                                                                                      | Timing of measurements |          |           |           |          |          |
|-----------------------------------------------------|-------------------------------------------------------------------------------------------------------------------------------------------------------------------------------------------------|------------------------|----------|-----------|-----------|----------|----------|
|                                                     |                                                                                                                                                                                                 | screening              | baseline | admission | discharge | 3 months | 6 months |
| Degree of illness based on physiological parameters | Vital signs alarm score; Modified Early Warning Score, <sup>37</sup>                                                                                                                            | R                      |          |           |           |          |          |
| Cognitive impairment                                | 4AT-test for delirium* Six item cognitive impairment test for cognitive impairment*, <sup>28,38</sup>                                                                                           | R                      |          |           |           |          |          |
| Socio-demographics                                  | Date of birth, nationality, household composition, marital status, highest level of education                                                                                                   |                        | R        |           |           |          |          |
| Health status                                       | Charlson co-morbidity index*, <sup>39</sup>                                                                                                                                                     |                        | R        |           |           |          |          |
| Identifying at-risk patients                        | Safety management system patient screening (VMS), <sup>40</sup>                                                                                                                                 |                        | R        |           |           |          |          |
| Functional status                                   | Activities of daily living, modified Katz-ADL index score, <sup>41</sup>                                                                                                                        |                        | R        |           | R         | R        | R        |
| Health status                                       | EQ-5d-5l*, <sup>42</sup>                                                                                                                                                                        |                        | R        |           | R         | R        | R        |
| (Health-related) quality of life, well-being        | Icepap capability measure for Older people (ICECAP-O)* <sup>43</sup>                                                                                                                            |                        | R        |           | R         | R        | R        |
| Caregiver burden                                    | Self-rated burden scale*, caregiver strain index*, <sup>44,45</sup>                                                                                                                             |                        | C        |           | C         | C        | C        |
| Medical consumption                                 | Imta Medical Consumption Questionnaire (imcq)*, <sup>46</sup>                                                                                                                                   |                        | P,C      |           |           | P,C      | P,C      |
| Hospitalisation-associated geriatric syndromes      | Infections, falls, pressure injuries, in case of delirium; delirium observation scale score (DOSS) <sup>47</sup> and use of physical or chemical restraints, total days with a urinary catheter |                        |          | N         |           |          |          |
| Nutrition                                           | Malnutrition Universal Screening Tool (MUST), <sup>48</sup>                                                                                                                                     |                        | N        |           |           |          |          |
|                                                     | Food intake, fluid intake                                                                                                                                                                       |                        |          | N         |           |          |          |
| Pain                                                | Numeric Rating Scale-score (NRS) for pain <sup>49</sup>                                                                                                                                         |                        |          | N         |           |          |          |
| Health perception                                   | (Rotterdam) symptom checklist* <sup>50</sup>                                                                                                                                                    |                        |          | N         |           |          |          |
| Immobility                                          | Hierarchical assessment of balance and mobility (HABAM) <sup>51</sup>                                                                                                                           |                        |          | Ph        |           |          |          |
| Satisfaction with care                              | Client Satisfaction Questionnaire 8 (CSQ-8)*, care evaluation question*, <sup>52,53</sup>                                                                                                       |                        |          |           | P         | P,C      | N,D      |
| Mortality                                           | Mortality at 30 days, 3 months and 6 months after baseline*                                                                                                                                     |                        |          |           | N         | R        | R        |
| (Re)admission hospital                              | Length of stay, readmission rate at 30 days, 3 months and 6 months after baseline*                                                                                                              |                        |          |           | N         | R        | R        |

279 Assessed by: P= Participant, C=Caregiver, N= Nurse, D= Doctor, R= Research nurse, Ph=Physiotherapist.

280 (\*)= All assessments marked by an asterisk are extra for trial purposes and are not part of the medical treatment

281

282 *Other outcomes measures*

283 Advantages and disadvantages of the Hospital at Home care program will be assessed through  
 284 multiple instruments and questionnaires. The instruments are validated and used in community-  
 285 dwelling older patients with cognitive disorders. Additional data will be collected on the time spent  
 286 at home (home-time); total number of days alive and out of the hospital or a skilled nursing facility in  
 287 the 6 months following the randomization at the emergency department,<sup>54</sup> the number of transfers  
 288 (home ↔ hospital) and the number of health care professionals involved.

1  
2  
3 289 Cost data will be collected, as described by Drummond et al., including the costs to the health care  
4 290 system, patients and families, and other sectors.<sup>55</sup> The volume of care use will be extracted from  
5  
6 291 hospital files and combined with the reference cost values, as provided by the cost guidance module  
7  
8 292 of the Dutch National Health Care Institute.<sup>56</sup>  
9

### 10 293 **Process evaluation**

11  
12 294 A process evaluation will be conducted as part of the feasibility study to understand the barriers and  
13  
14 295 facilitators to participate and to gain an understanding of the experiences and perceptions of  
15  
16 296 Hospital at Home care of participants and health care professionals. From all eligible patients who  
17  
18 297 declined to participate, data concerning the patient characteristics and reasons for non-participation  
19  
20 298 will be collected. At the end of the trial, a representative sample of participants and/or their informal  
21  
22 299 caregivers will be invited for an interview to evaluate their experiences receiving Hospital at Home  
23  
24 300 care. The interviewer will not be a an active member of the research team or involved in day-to-day  
25  
26 301 care and will explore independently how the participants perceived Hospital at Home care, including  
27  
28 302 the contact with the health professionals and the impact of Hospital at Home care on their lives and  
29  
30 303 their caregivers' personal lives. In case of participant dropout, efforts will be made to obtain an  
31  
32 304 understanding of why the participants did not complete the trial.

33  
34 305 In addition, a representative sample of health care professionals, consisting of physicians and nurses  
35  
36 306 working in the Emergency Department, physicians and nurses providing the Hospital at Home care,  
37  
38 307 and general practitioners, will be asked to participate in a face-to-face interview. The health care  
39  
40 308 professionals will be asked about their experiences and opinions about the H@H-trial and Hospital at  
41  
42 309 Home care. All interviews will be transcribed verbatim, and a framework analysis will be used as the  
43  
44 310 method of qualitative data analysis.<sup>57</sup>

### 45 311 **Data management**

46  
47 312 All data will be entered in an electronic trial-specific database, with the participants identified by a  
48  
49 313 unique trial number. Confidentiality of participant information will be maintained throughout the  
50  
51 314 trial. Information can only be traced to the participants by designated researchers. The database will  
52  
53 315 be stored and maintained by Castor Electronic Data Capture, compliant with GCP guidelines and the  
54  
55 316 European Data Protection Directive (Castor Electronic Data Capture, Ciwit BV, Amsterdam, the  
56  
57 317 Netherlands, 2017). Data will be stored for a maximum period of 15 years after the study has ended,  
58  
59 318 according to Dutch law.<sup>58</sup>  
60

## 319 **Statistical analysis**

320

321 The participant flow diagram, according to CONSORT guidelines,<sup>59</sup> will provide a summary of the  
322 recruitment and declination rates in percentage (%) at baseline, discharge and three- and six-month  
323 follow-ups. Distributions of the data at baseline, discharge and three and six months after  
324 randomization will be explored, with unusual values noted and explained. Variables will be  
325 summarized as the n (%), mean (standard deviation) or median (interquartile range) for each group,  
326 to characterize the sample and search for any imbalances. The percentages, means and standard  
327 deviation, and medians and interquartile ranges will be calculated to describe the quality of care and  
328 the advantages and disadvantages of Hospital at Home care at baseline, discharge and three- and six-  
329 month follow-ups.

330

## 331 **Monitoring and participant safety**

332

333 Although, the H@H trial is considered to be a low risk trial, the participant safety will be monitored  
334 by an independent Data Monitoring Committee (DMC). The DMC will consist of two members: an  
335 experienced clinician and an epidemiologist. Members of the DMC are independent of the trial and  
336 will discuss each individual participant with serious adverse events. The DMC will receive and review  
337 the serious adverse events and evaluate the risk involved with negative outcomes. The DMC is  
338 authorized to make recommendations to temporary put on hold or ending the study prematurely  
339 when participant safety is an issue, based on their findings. All serious adverse events will be  
340 reported to the principal investigator within 24 hours of knowledge of the event and then  
341 subsequently reported to the Dutch portal for medical research involving human subjects.

## 342 **Discussion**

---

343 Reducing unwanted hospital admissions in older patients with cognitive impairments and facilitating  
344 patient-centred care in a patient's preferred location is a goal worthy of pursuing. This goal aligns  
345 with the tenet of the current Dutch government and the advice provided by the Dutch Council for the  
346 Environment and Infrastructure: to actively promote and enable people to live independently in their  
347 own homes for as long as they desire.<sup>60</sup> Previous trials and a recent review have confirmed that  
348 alternative management strategies for low-risk patients with acute medical conditions conventionally  
349 treated through hospitalization exist with positive impact on patient satisfaction, are effective and  
350 can be safely achieved in lower cost settings.<sup>22,23,61</sup>

1  
2  
3 351 Introducing a Hospital at Home care trajectory in the Netherlands is incited by the principles of value-  
4 352 based health care: improving the patients experience of care and as a result of this process reducing  
5 353 the costs.<sup>62</sup> All countries with an ageing population experience pressure, in terms of shortage of  
6 354 (emergency) hospital beds and rising healthcare costs. Hospital at Home care could be shown  
7 355 beneficial in facilitating higher valued care for patients and their caregivers without additional costs.  
8 356 Benefit should be measured in other outcomes than clinical indicators such as mortality. To illustrate,  
9 357 one of the outcomes of a future RCT could be the time spent at home. Time spent at home has been  
10 358 defined as the total number of days alive and out of the hospital or a skilled nursing facility in the 6  
11 359 months after hospital admission.<sup>54</sup> It has been used as a primary outcome in a follow-up study of  
12 360 older patients with acute hospital admissions, and has been demonstrated to be of more importance  
13 361 in older patients.<sup>63-65</sup> Evaluation of time spent a home in this feasibility study could support  
14 362 estimating a sample size based on a patient-relevant outcome in a future RCT.

15 363 This study will be the first to investigate the feasibility of providing acute hospital care at home for  
16 364 older patients with cognitive impairment in the Netherlands. Studying Hospital at Home care and  
17 365 identifying the barriers and facilitators will support the implementation of Hospital at Home care and  
18 366 break new ground for a future RCT investigating the (cost-)effectiveness.

## 367 **Ethics and Dissemination**

368 This study was approved by the Medical Research Ethics Committee of the University Medical Center  
369 Groningen in April 2017, reference number: 2016.686 The trial will be conducted in accordance with  
370 the Declaration of Helsinki 1996, principles of good clinical practice and the University Medical  
371 Center of Groningen Research Code. Any protocol amendments will be submitted to the ethics  
372 committee. A register of the protocol amendments will be available in the study protocol.

373 The results of the trial will be reported according to the CONSORT guidelines and will contribute to  
374 knowledge of the implementation of Hospital at Home care and patient-centred acute care for older  
375 patients with cognitive impairment. The study will also contribute to the knowledge of the  
376 transmurial cooperation and costs of providing care, in terms of the translocation of hospital care to  
377 home. Regularly updates will be published on the study website and in newsletters. Conferences and  
378 meetings will be held for all involved health care professionals. Participants who requested  
379 information on the study will be sent a lay summary. A publication policy will be agreed upon with  
380 co-applicants. The study findings will be published in relevant peer-reviewed journals.

381  
382  
383 **Acknowledgements** The authors would like to thank all care professionals of Alzheimer Nederland, Espria,  
384 Icare, TSN, Buurtzorg, umcGroningen thuis, MCZ, Netwerk Dementie Groningen, Netwerk Dementie Drenthe,

385 Gemeente Groningen, WIJ Groningen, Zorgbelang, Healthy Aging Network Northern Netherlands, Stichting  
 386 Effectieve Ouderenzorg, ZonMw, Deltaplan Dementie, Nationaal Programma Ouderenzorg, Zorg innovatie  
 387 Forum and the elderly of Denktank 60+ Noord for their time, critical appraisal and advise.  
 388

389 **Contributors** MP contributed to the conception and design of the protocol, drafted the manuscript, and revised  
 390 the final manuscript. AC, BM, JM, and NS made substantial contributions to the conception and design of the  
 391 protocol. NS contributed to the methodological aspects of the protocol. AC, BM and JM contributed to the  
 392 clinical aspects of the protocol. SR conceived the study, developed the protocol together with MP and wrote  
 393 the funding applications. All authors critically revised the manuscript and approved the final version of this  
 394 manuscript.

395  
 396 **Funding** This study is independent research funded by ZonMw (project Memorabel, Deltaplan Dementie),  
 397 project number #733050401 (contact: memorabel@zonmw.nl). Additional funding is provided by the Dutch  
 398 Ministry of Health, Welfare and Sport (Ministerie van Volksgezondheid, Welzijn en Sport) and the University  
 399 Medical Center Groningen.  
 400

401 **Disclaimer** The views and opinions expressed in this paper are those of the authors and not necessarily those  
 402 of the UMCG, Memorabel, Deltaplan Dementie or ZonMw.  
 403

404 **Competing interests** All authors have declared that they have no competing interests  
 405

406 **Ethics approval** for this study has been obtained from the Medical Research Ethics Committee of the University  
 407 Medical Center Groningen April 2017 (ref: 2016.686).  
 408

409 **Recruitment status** is pending; participants are not yet being recruited or enrolled. Anticipated date of  
 410 enrolment of the first participant is December 2017.  
 411

412 **Scientific inquiries:** prof Sophia E.de Rooij, s.e.j.a.de.rooij@umcg.nl, telephone number 0031-50-3613921,  
 413 Hanzeplein 1, Postbus 30 001, 9700 RB Groningen. University of Groningen, University Medical Center  
 414 Groningen, University Center for Geriatric Medicine, Groningen, The Netherlands.  
 415 Generic email address [hospitalathome@umcg.nl](mailto:hospitalathome@umcg.nl).  
 416

## 417 Abbreviations

418 ADL: Activities of Daily Living  
 419 CT: Computer Tomography  
 420 DMC: Data Monitoring Committee  
 421 ED: Emergency Department  
 422 H@H: Hospital at Home  
 423 RCT: Randomized Controlled Trial  
 424 UMCG: University Medical Center Groningen  
 425

## 426 References

- 427 (1) Krumholz HM. Post-Hospital Syndrome - A Condition of Generalized Risk. *N Engl J Med* 2013  
 428 01/10;368(2):100-102.  
 429 (2) Missildine K, Bergstrom N, Meininger J, Richards K, Foreman MD. Sleep in Hospitalized Elders: A Pilot Study.  
 430 *Geriatr Nurs* 2010 0;31(4):263-271.  
 431 (3) Brown CJ, Redden DT, Flood KL, Allman RM. The underrecognized epidemic of low mobility during  
 432 hospitalization of older adults. *J Am Geriatr Soc* 2009 Sep;57(9):1660-1665.  
 433 (4) Sullivan DH, Sun S, Walls RC. Protein-energy undernutrition among elderly hospitalized patients: a  
 434 prospective study. *JAMA* 1999 Jun 2;281(21):2013-2019.  
 435 (5) Creditor MC. Hazards of hospitalization of the elderly. *Ann Intern Med* 1993;118(3):219-223.  
 436 (6) Inouye SK, Studenski S, Tinetti ME, Kuchel GA. Geriatric Syndromes: Clinical, Research, and Policy  
 437 Implications of a Core Geriatric Concept. *J Am Geriatr Soc* 2007;55(5):780-791.



- 1  
2  
3 438 (7) Mudge AM, Banks MD, Barnett AG, Blackberry I, Graves N, Green T, et al. CHERISH (collaboration for  
4 439 hospitalised elders reducing the impact of stays in hospital): protocol for a multi-site improvement program to  
5 440 reduce geriatric syndromes in older inpatients. *BMC Geriatrics* 2017;17(1):11.  
6 441 (8) Covinsky KE, Pierluissi E, Johnston CB. Hospitalization-associated disability: "She was probably able to  
7 442 ambulate, but I'm not sure". *JAMA* 2011 Oct 26;306(16):1782-1793.  
8 443 (9) Zisberg A, Shadmi E, Gur-Yaish N, Tonkikh O, Sinoff G. Hospital-associated functional decline: the role of  
9 444 hospitalization processes beyond individual risk factors. *J Am Geriatr Soc* 2015 Jan;63(1):55-62.  
10 445 (10) Fried LP, Tangen CM, Walston J, Newman AB, Hirsch C, Gottdiener J, et al. Frailty in older adults: evidence  
11 446 for a phenotype. *J Gerontol A Biol Sci Med Sci* 2001 Mar;56(3):M146-56.  
12 447 (11) Clegg A, Young J, Iliffe S, Rikkert MO, Rockwood K. Frailty in elderly people. *The Lancet* 2013 3/2-  
13 448 8;381(9868):752-762.  
14 449 (12) Ferrucci L, Guralnik JM, Studenski S, Fried LP, Cutler GB, Walston JD, et al. Designing Randomized,  
15 450 Controlled Trials Aimed at Preventing or Delaying Functional Decline and Disability in Frail, Older Persons: A  
16 451 Consensus Report. *J Am Geriatr Soc* 2004;52(4):625-634.  
17 452 (13) Glover A, Bradshaw LE, Watson N, Laithwaite E, Goldberg SE, Whittamore KH, et al. Diagnoses, problems  
18 453 and healthcare interventions amongst older people with an unscheduled hospital admission who have  
19 454 concurrent mental health problems: a prevalence study. *BMC geriatrics* 2014;14(1):1.  
20 455 (14) Pinkert C, Holle B. People with dementia in acute hospitals. Literature review of prevalence and reasons  
21 456 for hospital admission. *Z Gerontol Geriatr* 2012 Dec;45(8):728-734.  
22 457 (15) Mukadam N, Sampson EL. A systematic review of the prevalence, associations and outcomes of dementia  
23 458 in older general hospital inpatients. *International Psychogeriatrics* 2011;23(03):344-355.  
24 459 (16) Timmons S, Manning E, Barrett A, Brady NM, Browne V, O'Shea E, et al. Dementia in older people admitted  
25 460 to hospital: a regional multi-hospital observational study of prevalence, associations and case recognition. *Age*  
26 461 *Ageing* 2015 Nov;44(6):993-999.  
27 462 (17) Bradshaw LE, Goldberg SE, Lewis SA, Whittamore K, Gladman JRF, Jones RG, et al. Six-month outcomes  
28 463 following an emergency hospital admission for older adults with co-morbid mental health problems indicate  
29 464 complexity of care needs. *Age and Ageing* 2013 September 01;42(5):582-588.  
30 465 (18) Satizabal CL, Beiser AS, Chouraki V, Chêne G, Dufouil C, Seshadri S. Incidence of Dementia over Three  
31 466 Decades in the Framingham Heart Study. *N Engl J Med* 2016 02/11; 2016/02;374(6):523-532.  
32 467 (19) World Health Organization. Dementia Fact sheet. April 2016; Available at:  
33 468 <http://www.who.int/mediacentre/factsheets/fs362/en/>. Accessed January 25, 2017.  
34 469 (20) Fried TR, van Doorn C, O'Leary JR, Tinetti ME, Drickamer MA. Older persons' preferences for home vs  
35 470 hospital care in the treatment of acute illness. *Arch Intern Med* 2000;160(10):1501-1506.  
36 471 (21) Fried TR, Bradley EH, Towle VR, Allore H. Understanding the Treatment Preferences of Seriously Ill  
37 472 Patients. *N Engl J Med* 2002 04/04; 2017/05;346(14):1061-1066.  
38 473 (22) Shepperd S, Iliffe S, Doll HA, Clarke MJ, Kalra L, Wilson AD, et al. Admission avoidance hospital at home.  
39 474 *The Cochrane Library* 2016.  
40 475 (23) Conley J, O'Brien CW, Leff BA, Bolen S, Zulman D. Alternative strategies to inpatient hospitalization for  
41 476 acute medical conditions: A systematic review. *JAMA Internal Medicine* 2016 November 1;176(11):1693-1702.  
42 477 (24) Caplan G. Does 'Hospital in the Home' treatment prevent delirium? *Aging Health* 2008 02/01;  
43 478 2017/12;4(1):69-74.  
44 479 (25) Tibaldi V, Aimonino N, Ponzetto M, Stasi M, Amati D, Raspo S, et al. A randomized controlled trial of a  
45 480 home hospital intervention for frail elderly demented patients: behavioral disturbances and caregiver's stress.  
46 481 *Arch Gerontol Geriatr* 2004;38:431-436.  
47 482 (26) Shepperd S, Craddock-Bamford A, Butler C, Ellis G, Godfrey M, Gray A, et al. A multi-centre randomised  
48 483 trial to compare the effectiveness of geriatrician-led admission avoidance hospital at home versus inpatient  
49 484 admission. *Trials* 2017;18:10.1186/s13063-017-2214-y.  
50 485 (27) Chan AW, Tetzlaff JM, Altman DG, Laupacis A, Gotzsche PC, Krleza-Jeric K, et al. SPIRIT 2013 statement:  
51 486 defining standard protocol items for clinical trials. *Ann Intern Med* 2013 Feb 5;158(3):200-207.  
52 487 (28) Bellelli G, Morandi A, Davis DHJ, Mazzola P, Turco R, Gentile S, et al. Validation of the 4AT, a new  
53 488 instrument for rapid delirium screening: a study in 234 hospitalised older people. *Age and Ageing* 2014 March  
54 489 02.  
55 490 (29) Katzman R, Brown T, Fuld P, Peck A, Schechter R, Schimmel H. Validation of a short Orientation-Memory-  
56 491 Concentration Test of cognitive impairment. *Am J Psychiatry* 1983 Jun;140(6):734-739.  
57 492 (30) Shepperd S, Harwood D, Jenkinson C, Gray A, Vessey M, Morgan P. Randomised controlled trial comparing  
58 493 hospital at home care with inpatient hospital care. I: three month follow up of health outcomes. *BMJ* 1998 Jun  
59 494 13;316(7147):1786-1791.

- 1  
2  
3 495 (31) Cei M, Bartolomei C, Mumoli N. In-hospital mortality and morbidity of elderly medical patients can be  
4 496 predicted at admission by the Modified Early Warning Score: a prospective study. *Int J Clin Pract*  
5 497 2009;63(4):591-595.
- 6 498 (32) Dunder ZD, Ergin M, Karamercan MA, Ayranci K, Colak T, Tuncar A, et al. Modified Early Warning Score and  
7 499 VitalPac Early Warning Score in geriatric patients admitted to emergency department. *Eur J Emerg Med* 2015.  
8 500 (33) Ridley S. The recognition and early management of critical illness. *Ann R Coll Surg Engl* 2005 Sep;87(5):315-  
9 501 322.
- 10 502 (34) Aimonino Ricauda N, Tibaldi V, Leff B, Scarafiotti C, Marinello R, Zanocchi M, et al. Substitutive "hospital at  
11 503 home" versus inpatient care for elderly patients with exacerbations of chronic obstructive pulmonary disease:  
12 504 a prospective randomized, controlled trial. *J Am Geriatr Soc* 2008;56(3):493-500.
- 13 505 (35) Tibaldi V, Isaia G, Scarafiotti C, Gariglio F, Zanocchi M, Bo M, et al. Hospital at home for elderly patients  
14 506 with acute decompensation of chronic heart failure: a prospective randomized controlled trial. *Arch Intern Med*  
15 507 2009;169(17):1569-1575.
- 16 508 (36) Worth A, Tierney AJ. Conducting research interviews with elderly people by telephone. *J Adv Nurs*  
17 509 1993;18(7):1077-1084.
- 18 510 (37) Subbe CP, Kruger M, Rutherford P, Gemmel L. Validation of a modified Early Warning Score in medical  
19 511 admissions. *QJM* 2001 Oct;94(10):521-526.
- 20 512 (38) American College of Emergency Physicians, American Geriatrics Society, Emergency Nurses Association,  
21 513 Society for Academic Emergency Medicine, Geriatric Emergency Department Guidelines Task Force. Geriatric  
22 514 emergency department guidelines. *Ann Emerg Med* 2014 May;63(5):e7-25.
- 23 515 (39) Charlson ME, Pompei P, Ales KL, MacKenzie CR. A new method of classifying prognostic comorbidity in  
24 516 longitudinal studies: development and validation. *J Chronic Dis* 1987;40(5):373-383.
- 25 517 (40) Oud F, de Rooij S, Schuurman T, Duijvelaar K, van Munster B. [Predictive value of the VMS theme 'Frail  
26 518 elderly': delirium, falling and mortality in elderly hospital patients]. *Ned Tijdschr Geneesk* 2014;159:A8491-  
27 519 A8491.
- 28 520 (41) Katz S, Ford AB, Moskowitz RW, Jackson BA, Jaffe MW. Studies of illness in the aged: the index of ADL: a  
29 521 standardized measure of biological and psychosocial function. *JAMA* 1963;185(12):914-919.
- 30 522 (42) Herdman M, Gudex C, Lloyd A, Janssen M, Kind P, Parkin D, et al. Development and preliminary testing of  
31 523 the new five-level version of EQ-5D (EQ-5D-5L). *Quality of Life Research* 2011;20(10):1727-1736.
- 32 524 (43) Makai P, Brouwer WBF, Koopmanschap MA, Nieboer AP. Capabilities and quality of life in Dutch psycho-  
33 525 geriatric nursing homes: an exploratory study using a proxy version of the ICECAP-O. *Quality of Life Research*  
34 526 2012;21(5):801-812.
- 35 527 (44) van Exel NJ, Scholte op Reimer WJ, Brouwer WB, van den Berg B, Koopmanschap MA, van den Bos GA.  
36 528 Instruments for assessing the burden of informal caregiving for stroke patients in clinical practice: a  
37 529 comparison of CSI, CRA, SCQ and self-rated burden. *Clin Rehabil* 2004 Mar;18(2):203-214.
- 38 530 (45) Robinson BC. Validation of a Caregiver Strain Index. *Journal of Gerontology* 1983 May 01;38(3):344-348.
- 39 531 (46) Bouwmans C, Hakkaart-van Roijen L, Koopmanschap M, Krol M, Severens H, Brouwer W. Handleiding iMTA  
40 532 Medical Cost Questionnaire (iMCQ). Rotterdam: iMTA, Erasmus Universiteit Rotterdam, 2013.
- 41 533 (47) Gavinski K, Carnahan R, Weckmann M. Validation of the delirium observation screening scale in a  
42 534 hospitalized older population. *Journal of Hospital Medicine* 2016:n/a-n/a.
- 43 535 (48) Stratton RJ, Hackston A, Longmore D, Dixon R, Price S, Stroud M, et al. Malnutrition in hospital outpatients  
44 536 and inpatients: prevalence, concurrent validity and ease of use of the 'malnutrition universal screening  
45 537 tool' ('MUST') for adults. *Br J Nutr* 2004;92(05):799-808.
- 46 538 (49) Hawker GA, Mian S, Kendzerska T, French M. Measures of adult pain: Visual Analog Scale for Pain (VAS  
47 539 Pain), Numeric Rating Scale for Pain (NRS Pain), McGill Pain Questionnaire (MPQ), Short-Form McGill Pain  
48 540 Questionnaire (SF-MPQ), Chronic Pain Grade Scale (CPGS), Short Form-36 Bodily Pain Scale (SF-36 BPS), and  
49 541 Measure of Intermittent and Constant Osteoarthritis Pain (ICOAP). *Arthritis Care & Research*  
50 542 2011;63(S11):S240-S252.
- 51 543 (50) de Haes J.C., van Knippenberg F.C., Neijt JP. Measuring psychological and physical distress in cancer  
52 544 patients: structure and application of the Rotterdam Symptom Checklist. *Br J Cancer* 1990 12;62(6):1034-1038.
- 53 545 (51) MacKnight C, Rockwood K. A Hierarchical Assessment of Balance and Mobility. *Age Ageing* 1995  
54 546 Mar;24(2):126-130.
- 55 547 (52) Attkisson CC, Greenfield TK. The UCSF Client Satisfaction Scales: I. The Client Satisfaction Questionnaire-8.  
56 548 1999.
- 57 549 (53) Reichheld FF. The one number you need to grow. *Harv Bus Rev* 2003;81(12):46-55.
- 58 550 (54) Quinn TJ, Dawson J, Lees JS, Chang T, Walters MR, Lees KR, et al. Time Spent at Home Poststroke: "Home-  
59 551 Time" a Meaningful and Robust Outcome Measure for Stroke Trials. *Stroke* 2008 January 01;39(1):231-233.

- 1  
2  
3 552 (55) Drummond MF, Sculpher MJ, Claxton K, Stoddart GL, Torrance GW. Methods for the economic evaluation  
4 553 of health care programmes. : Oxford university press; 2015.
- 5 554 (56) Hakkaart-van Roijen L, Van der Linden N, Bouwmans C, Kanters T, Tan S. Kostenhandleiding. Methodologie  
6 555 van kostenonderzoek en referentieprijzen voor economische evaluaties in de gezondheidszorg. In opdracht van  
7 556 Zorginstituut Nederland. Geactualiseerde versie 2015.
- 8 557 (57) Ritchie J, Spencer L. Qualitative data analysis for applied policy research. The qualitative researcher's  
9 558 companion 2002;573(2002):305-329.
- 10 559 (58) Wet bescherming persoonsgegevens (2000, 6th of July). Available at:  
11 560 <http://wetten.overheid.nl/BWBR0011468/2017-07-01/0/>. Accessed October 25, 2017.
- 12 561 (59) Schulz KF, Altman DG, Moher D. CONSORT 2010 Statement: updated guidelines for reporting parallel  
13 562 group randomised trials. *Trials* 2010;11(1):32.
- 14 563 (60) Raad voor de leefomgeving en infrastructuur. Langer zelfstandig, een gedeelde opgave van wonen, zorg en  
15 564 welzijn. Advies van de Raad voor de Leefomgeving en infrastructuur over langer zelfstandig wonen, 2014.  
16 565 Available at [http://www.rli.nl/sites/default/files/rli-](http://www.rli.nl/sites/default/files/rli-briefadvieslangerzelfstandigeengedeeldeopgavevanwonenzorgenwelzijndef23-113-30_0.pdf)  
17 566 [briefadvieslangerzelfstandigeengedeeldeopgavevanwonenzorgenwelzijndef23-113-30\\_0.pdf](http://www.rli.nl/sites/default/files/rli-briefadvieslangerzelfstandigeengedeeldeopgavevanwonenzorgenwelzijndef23-113-30_0.pdf) Accessed October  
18 567 25, 2017.
- 19 568 (61) Caplan GA, Sulaiman NS, Mangin DA, Aimonino Ricauda N, Wilson AD, Barclay L. A meta-analysis of  
20 569 "hospital in the home". *Med J Aust* 2012 Nov 5;197(9):512-519.
- 21 570 (62) Porter ME. What Is Value in Health Care? *N Engl J Med* 2010 12/23; 2016/06;363(26):2477-2481.
- 22 571 (63) Bradshaw LE, Goldberg SE, Lewis SA, Whittamore K, Gladman J, Jones R, et al. Six-month outcomes  
23 572 following an emergency hospital admission for older adults with co-morbid mental health problems indicate  
24 573 complexity of care needs. *Age Ageing* 2013;42(5):582-588.
- 25 574 (64) Sayer C. "Time Spent at Home" — A Patient-Defined Outcome. *NEJM Catalyst*. 2016.
- 26 575 (65) Groff AC, Colla CH, Lee TH. Days Spent at Home — A Patient-Centered Goal and Outcome. *N Engl J Med*  
27 576 2016 10/27; 2017/01;375(17):1610-1612.  
28 577

## 578 Figure Legends

---

579

580 Figure 1: Flowchart of trial design summary

581

582

1  
2  
3  
4  
5  
6  
7  
8  
9  
10  
11  
12  
13  
14  
15  
16  
17  
18  
19  
20  
21  
22  
23  
24  
25  
26  
27  
28  
29  
30  
31  
32  
33  
34  
35  
36  
37  
38  
39  
40  
41  
42  
43  
44  
45  
46  
47  
48  
49  
50  
51  
52  
53  
54  
55  
56  
57  
58  
59  
60

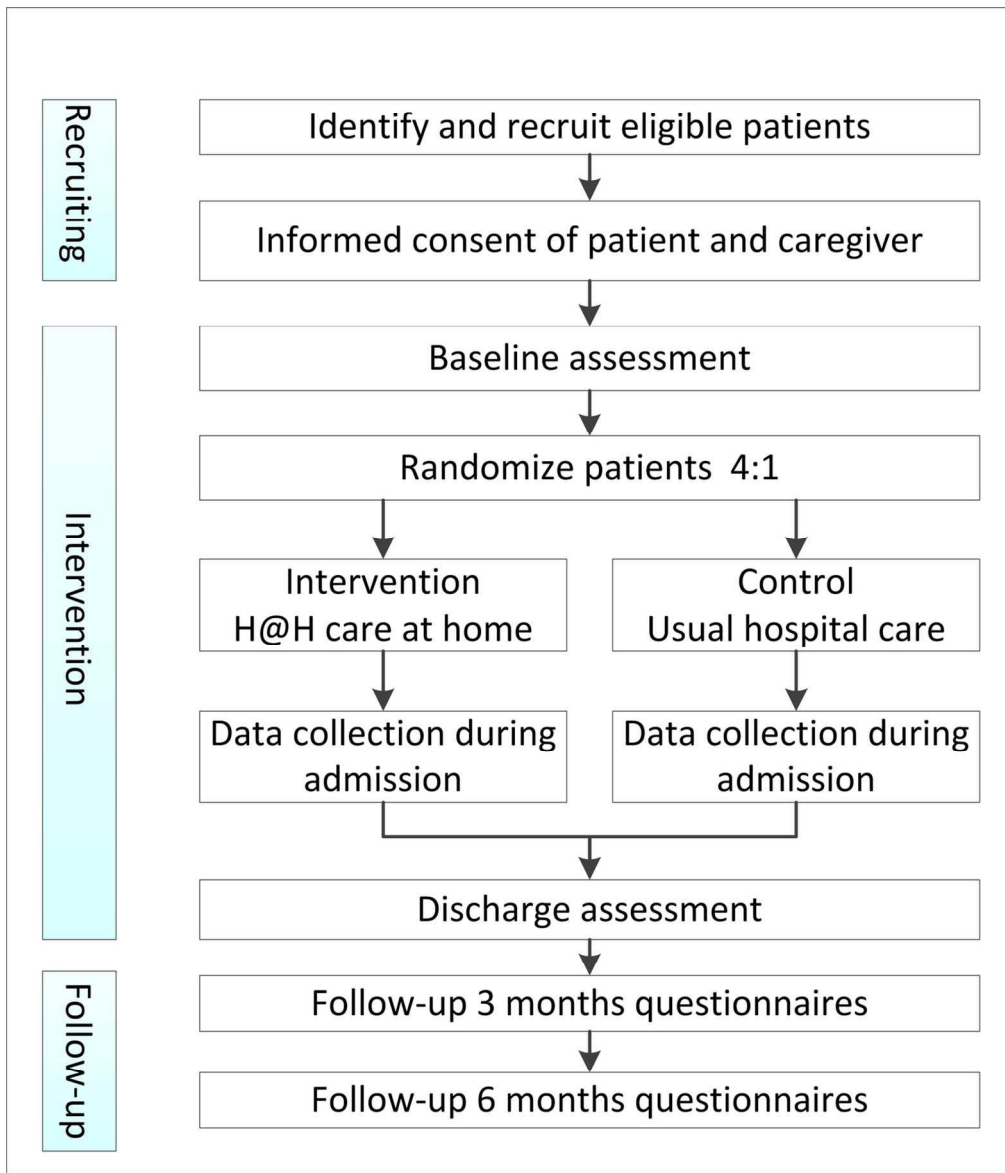

Figure 1: Flowchart of trial design summary

127x148mm (300 x 300 DPI)



SPIRIT 2013 Checklist: Recommended items to address in a clinical trial protocol and related documents\*

| Section/item                      | Item No | Description                                                                                                                                                                                                                                                                              | Addressed on page number    |
|-----------------------------------|---------|------------------------------------------------------------------------------------------------------------------------------------------------------------------------------------------------------------------------------------------------------------------------------------------|-----------------------------|
| <b>Administrative information</b> |         |                                                                                                                                                                                                                                                                                          |                             |
| Title                             | 1       | Descriptive title identifying the study design, population, interventions, and, if applicable, trial acronym                                                                                                                                                                             | 1                           |
| Trial registration                | 2a      | Trial identifier and registry name. If not yet registered, name of intended registry                                                                                                                                                                                                     | 1                           |
|                                   | 2b      | All items from the World Health Organization Trial Registration Data Set                                                                                                                                                                                                                 | 1, 3, 4, 5, 6, 8, 9, 13, 14 |
| Protocol version                  | 3       | Date and version identifier                                                                                                                                                                                                                                                              | all                         |
| Funding                           | 4       | Sources and types of financial, material, and other support                                                                                                                                                                                                                              | 14                          |
| Roles and responsibilities        | 5a      | Names, affiliations, and roles of protocol contributors                                                                                                                                                                                                                                  | 14                          |
|                                   | 5b      | Name and contact information for the trial sponsor                                                                                                                                                                                                                                       | 14                          |
|                                   | 5c      | Role of study sponsor and funders, if any, in study design; collection, management, analysis, and interpretation of data; writing of the report; and the decision to submit the report for publication, including whether they will have ultimate authority over any of these activities | 14                          |
|                                   | 5d      | Composition, roles, and responsibilities of the coordinating centre, steering committee, endpoint adjudication committee, data management team, and other individuals or groups overseeing the trial, if applicable (see Item 21a for data monitoring committee)                         | n/a                         |

1  
2  
3  
4  
5  
6  
7  
8  
9  
10  
11  
12  
13  
14  
15  
16  
17  
18  
19  
20  
21  
22  
23  
24  
25  
26  
27  
28  
29  
30  
31  
32  
33  
34  
35  
36  
37  
38  
39  
40  
41  
42  
43  
44  
45  
46  
47

**Introduction**

|                          |    |                                                                                                                                                                                                           |   |
|--------------------------|----|-----------------------------------------------------------------------------------------------------------------------------------------------------------------------------------------------------------|---|
| Background and rationale | 6a | Description of research question and justification for undertaking the trial, including summary of relevant studies (published and unpublished) examining benefits and harms for each intervention        | 3 |
|                          | 6b | Explanation for choice of comparators                                                                                                                                                                     | 3 |
| Objectives               | 7  | Specific objectives or hypotheses                                                                                                                                                                         | 3 |
| Trial design             | 8  | Description of trial design including type of trial (eg, parallel group, crossover, factorial, single group), allocation ratio, and framework (eg, superiority, equivalence, noninferiority, exploratory) | 4 |

**Methods: Participants, interventions, and outcomes**

|                      |     |                                                                                                                                                                                                                                                                                                                                                                                |       |
|----------------------|-----|--------------------------------------------------------------------------------------------------------------------------------------------------------------------------------------------------------------------------------------------------------------------------------------------------------------------------------------------------------------------------------|-------|
| Study setting        | 9   | Description of study settings (eg, community clinic, academic hospital) and list of countries where data will be collected. Reference to where list of study sites can be obtained                                                                                                                                                                                             | 4     |
| Eligibility criteria | 10  | Inclusion and exclusion criteria for participants. If applicable, eligibility criteria for study centres and individuals who will perform the interventions (eg, surgeons, psychotherapists)                                                                                                                                                                                   | 6     |
| Interventions        | 11a | Interventions for each group with sufficient detail to allow replication, including how and when they will be administered                                                                                                                                                                                                                                                     | 7, 8  |
|                      | 11b | Criteria for discontinuing or modifying allocated interventions for a given trial participant (eg, drug dose change in response to harms, participant request, or improving/worsening disease)                                                                                                                                                                                 | 7, 8  |
|                      | 11c | Strategies to improve adherence to intervention protocols, and any procedures for monitoring adherence (eg, drug tablet return, laboratory tests)                                                                                                                                                                                                                              | n/a   |
|                      | 11d | Relevant concomitant care and interventions that are permitted or prohibited during the trial                                                                                                                                                                                                                                                                                  | 9, 10 |
| Outcomes             | 12  | Primary, secondary, and other outcomes, including the specific measurement variable (eg, systolic blood pressure), analysis metric (eg, change from baseline, final value, time to event), method of aggregation (eg, median, proportion), and time point for each outcome. Explanation of the clinical relevance of chosen efficacy and harm outcomes is strongly recommended | 9, 10 |
| Participant timeline | 13  | Time schedule of enrolment, interventions (including any run-ins and washouts), assessments, and visits for participants. A schematic diagram is highly recommended (see Figure)                                                                                                                                                                                               | 10    |

|   |             |    |                                                                                                                                                                                       |   |
|---|-------------|----|---------------------------------------------------------------------------------------------------------------------------------------------------------------------------------------|---|
| 1 |             |    |                                                                                                                                                                                       |   |
| 2 |             |    |                                                                                                                                                                                       |   |
| 3 | Sample size | 14 | Estimated number of participants needed to achieve study objectives and how it was determined, including clinical and statistical assumptions supporting any sample size calculations | 6 |
| 4 |             |    |                                                                                                                                                                                       |   |
| 5 | Recruitment | 15 | Strategies for achieving adequate participant enrolment to reach target sample size                                                                                                   | 5 |
| 6 |             |    |                                                                                                                                                                                       |   |
| 7 |             |    |                                                                                                                                                                                       |   |

## 8 **Methods: Assignment of interventions (for controlled trials)**

### 9 Allocation:

|    |                                  |     |                                                                                                                                                                                                                                                                                                                                                          |     |
|----|----------------------------------|-----|----------------------------------------------------------------------------------------------------------------------------------------------------------------------------------------------------------------------------------------------------------------------------------------------------------------------------------------------------------|-----|
| 10 |                                  |     |                                                                                                                                                                                                                                                                                                                                                          |     |
| 11 |                                  |     |                                                                                                                                                                                                                                                                                                                                                          |     |
| 12 | Sequence generation              | 16a | Method of generating the allocation sequence (eg, computer-generated random numbers), and list of any factors for stratification. To reduce predictability of a random sequence, details of any planned restriction (eg, blocking) should be provided in a separate document that is unavailable to those who enrol participants or assign interventions | 4   |
| 13 |                                  |     |                                                                                                                                                                                                                                                                                                                                                          |     |
| 14 |                                  |     |                                                                                                                                                                                                                                                                                                                                                          |     |
| 15 |                                  |     |                                                                                                                                                                                                                                                                                                                                                          |     |
| 16 |                                  |     |                                                                                                                                                                                                                                                                                                                                                          |     |
| 17 | Allocation concealment mechanism | 16b | Mechanism of implementing the allocation sequence (eg, central telephone; sequentially numbered, opaque, sealed envelopes), describing any steps to conceal the sequence until interventions are assigned                                                                                                                                                | 4   |
| 18 |                                  |     |                                                                                                                                                                                                                                                                                                                                                          |     |
| 19 |                                  |     |                                                                                                                                                                                                                                                                                                                                                          |     |
| 20 |                                  |     |                                                                                                                                                                                                                                                                                                                                                          |     |
| 21 | Implementation                   | 16c | Who will generate the allocation sequence, who will enrol participants, and who will assign participants to interventions                                                                                                                                                                                                                                | 4   |
| 22 |                                  |     |                                                                                                                                                                                                                                                                                                                                                          |     |
| 23 |                                  |     |                                                                                                                                                                                                                                                                                                                                                          |     |
| 24 | Blinding (masking)               | 17a | Who will be blinded after assignment to interventions (eg, trial participants, care providers, outcome assessors, data analysts), and how                                                                                                                                                                                                                | 4   |
| 25 |                                  |     |                                                                                                                                                                                                                                                                                                                                                          |     |
| 26 |                                  |     |                                                                                                                                                                                                                                                                                                                                                          |     |
| 27 |                                  | 17b | If blinded, circumstances under which unblinding is permissible, and procedure for revealing a participant's allocated intervention during the trial                                                                                                                                                                                                     | n/a |
| 28 |                                  |     |                                                                                                                                                                                                                                                                                                                                                          |     |
| 29 |                                  |     |                                                                                                                                                                                                                                                                                                                                                          |     |
| 30 |                                  |     |                                                                                                                                                                                                                                                                                                                                                          |     |

## 31 **Methods: Data collection, management, and analysis**

|    |                         |     |                                                                                                                                                                                                                                                                                                                                                                                                              |           |
|----|-------------------------|-----|--------------------------------------------------------------------------------------------------------------------------------------------------------------------------------------------------------------------------------------------------------------------------------------------------------------------------------------------------------------------------------------------------------------|-----------|
| 32 |                         |     |                                                                                                                                                                                                                                                                                                                                                                                                              |           |
| 33 | Data collection methods | 18a | Plans for assessment and collection of outcome, baseline, and other trial data, including any related processes to promote data quality (eg, duplicate measurements, training of assessors) and a description of study instruments (eg, questionnaires, laboratory tests) along with their reliability and validity, if known. Reference to where data collection forms can be found, if not in the protocol | 9, 10, 11 |
| 34 |                         |     |                                                                                                                                                                                                                                                                                                                                                                                                              |           |
| 35 |                         |     |                                                                                                                                                                                                                                                                                                                                                                                                              |           |
| 36 |                         |     |                                                                                                                                                                                                                                                                                                                                                                                                              |           |
| 37 |                         |     |                                                                                                                                                                                                                                                                                                                                                                                                              |           |
| 38 |                         | 18b | Plans to promote participant retention and complete follow-up, including list of any outcome data to be collected for participants who discontinue or deviate from intervention protocols                                                                                                                                                                                                                    | 11        |
| 39 |                         |     |                                                                                                                                                                                                                                                                                                                                                                                                              |           |
| 40 |                         |     |                                                                                                                                                                                                                                                                                                                                                                                                              |           |
| 41 |                         |     |                                                                                                                                                                                                                                                                                                                                                                                                              |           |
| 42 |                         |     |                                                                                                                                                                                                                                                                                                                                                                                                              |           |
| 43 |                         |     |                                                                                                                                                                                                                                                                                                                                                                                                              |           |
| 44 |                         |     |                                                                                                                                                                                                                                                                                                                                                                                                              |           |
| 45 |                         |     |                                                                                                                                                                                                                                                                                                                                                                                                              |           |
| 46 |                         |     |                                                                                                                                                                                                                                                                                                                                                                                                              |           |
| 47 |                         |     |                                                                                                                                                                                                                                                                                                                                                                                                              |           |

1  
2  
3  
4  
5  
6  
7  
8  
9  
10  
11  
12  
13  
14  
15  
16  
17  
18  
19  
20  
21  
22  
23  
24  
25  
26  
27  
28  
29  
30  
31  
32  
33  
34  
35  
36  
37  
38  
39  
40  
41  
42  
43  
44  
45  
46  
47

|                     |     |                                                                                                                                                                                                                                                                   |     |
|---------------------|-----|-------------------------------------------------------------------------------------------------------------------------------------------------------------------------------------------------------------------------------------------------------------------|-----|
| Data management     | 19  | Plans for data entry, coding, security, and storage, including any related processes to promote data quality (eg, double data entry; range checks for data values). Reference to where details of data management procedures can be found, if not in the protocol | 11  |
| Statistical methods | 20a | Statistical methods for analysing primary and secondary outcomes. Reference to where other details of the statistical analysis plan can be found, if not in the protocol                                                                                          | 12  |
|                     | 20b | Methods for any additional analyses (eg, subgroup and adjusted analyses)                                                                                                                                                                                          | n/a |
|                     | 20c | Definition of analysis population relating to protocol non-adherence (eg, as randomised analysis), and any statistical methods to handle missing data (eg, multiple imputation)                                                                                   | n/a |

**Methods: Monitoring**

|                 |     |                                                                                                                                                                                                                                                                                                                                       |     |
|-----------------|-----|---------------------------------------------------------------------------------------------------------------------------------------------------------------------------------------------------------------------------------------------------------------------------------------------------------------------------------------|-----|
| Data monitoring | 21a | Composition of data monitoring committee (DMC); summary of its role and reporting structure; statement of whether it is independent from the sponsor and competing interests; and reference to where further details about its charter can be found, if not in the protocol. Alternatively, an explanation of why a DMC is not needed | 12  |
|                 | 21b | Description of any interim analyses and stopping guidelines, including who will have access to these interim results and make the final decision to terminate the trial                                                                                                                                                               | 12  |
| Harms           | 22  | Plans for collecting, assessing, reporting, and managing solicited and spontaneously reported adverse events and other unintended effects of trial interventions or trial conduct                                                                                                                                                     | 12  |
| Auditing        | 23  | Frequency and procedures for auditing trial conduct, if any, and whether the process will be independent from investigators and the sponsor                                                                                                                                                                                           | n/a |

**Ethics and dissemination**

|                          |    |                                                                                                                                                                                                                                  |    |
|--------------------------|----|----------------------------------------------------------------------------------------------------------------------------------------------------------------------------------------------------------------------------------|----|
| Research ethics approval | 24 | Plans for seeking research ethics committee/institutional review board (REC/IRB) approval                                                                                                                                        | 12 |
| Protocol amendments      | 25 | Plans for communicating important protocol modifications (eg, changes to eligibility criteria, outcomes, analyses) to relevant parties (eg, investigators, REC/IRBs, trial participants, trial registries, journals, regulators) | 12 |





|    |                               |     |                                                                                                                                                                                                                                                                                     |                      |
|----|-------------------------------|-----|-------------------------------------------------------------------------------------------------------------------------------------------------------------------------------------------------------------------------------------------------------------------------------------|----------------------|
| 1  |                               |     |                                                                                                                                                                                                                                                                                     |                      |
| 2  |                               |     |                                                                                                                                                                                                                                                                                     |                      |
| 3  | Consent or assent             | 26a | Who will obtain informed consent or assent from potential trial participants or authorised surrogates, and how (see Item 32)                                                                                                                                                        | 5                    |
| 4  |                               |     |                                                                                                                                                                                                                                                                                     |                      |
| 5  |                               |     |                                                                                                                                                                                                                                                                                     |                      |
| 6  |                               | 26b | Additional consent provisions for collection and use of participant data and biological specimens in ancillary studies, if applicable                                                                                                                                               | n/a                  |
| 7  |                               |     |                                                                                                                                                                                                                                                                                     |                      |
| 8  |                               |     |                                                                                                                                                                                                                                                                                     |                      |
| 9  | Confidentiality               | 27  | How personal information about potential and enrolled participants will be collected, shared, and maintained in order to protect confidentiality before, during, and after the trial                                                                                                | 10                   |
| 10 |                               |     |                                                                                                                                                                                                                                                                                     |                      |
| 11 |                               |     |                                                                                                                                                                                                                                                                                     |                      |
| 12 | Declaration of interests      | 28  | Financial and other competing interests for principal investigators for the overall trial and each study site                                                                                                                                                                       | 13                   |
| 13 |                               |     |                                                                                                                                                                                                                                                                                     |                      |
| 14 |                               |     |                                                                                                                                                                                                                                                                                     |                      |
| 15 | Access to data                | 29  | Statement of who will have access to the final trial dataset, and disclosure of contractual agreements that limit such access for investigators                                                                                                                                     | 10                   |
| 16 |                               |     |                                                                                                                                                                                                                                                                                     |                      |
| 17 |                               |     |                                                                                                                                                                                                                                                                                     |                      |
| 18 | Ancillary and post-trial care | 30  | Provisions, if any, for ancillary and post-trial care, and for compensation to those who suffer harm from trial participation                                                                                                                                                       | Available on request |
| 19 |                               |     |                                                                                                                                                                                                                                                                                     |                      |
| 20 |                               |     |                                                                                                                                                                                                                                                                                     |                      |
| 21 | Dissemination policy          | 31a | Plans for investigators and sponsor to communicate trial results to participants, healthcare professionals, the public, and other relevant groups (eg, via publication, reporting in results databases, or other data sharing arrangements), including any publication restrictions | 12                   |
| 22 |                               |     |                                                                                                                                                                                                                                                                                     |                      |
| 23 |                               |     |                                                                                                                                                                                                                                                                                     |                      |
| 24 |                               |     |                                                                                                                                                                                                                                                                                     |                      |
| 25 |                               | 31b | Authorship eligibility guidelines and any intended use of professional writers                                                                                                                                                                                                      | 13                   |
| 26 |                               |     |                                                                                                                                                                                                                                                                                     |                      |
| 27 |                               | 31c | Plans, if any, for granting public access to the full protocol, participant-level dataset, and statistical code                                                                                                                                                                     | n/a                  |
| 28 |                               |     |                                                                                                                                                                                                                                                                                     |                      |
| 29 | <b>Appendices</b>             |     |                                                                                                                                                                                                                                                                                     |                      |
| 30 |                               |     |                                                                                                                                                                                                                                                                                     |                      |
| 31 | Informed consent materials    | 32  | Model consent form and other related documentation given to participants and authorised surrogates                                                                                                                                                                                  | Available on request |
| 32 |                               |     |                                                                                                                                                                                                                                                                                     |                      |
| 33 |                               |     |                                                                                                                                                                                                                                                                                     |                      |
| 34 | Biological specimens          | 33  | Plans for collection, laboratory evaluation, and storage of biological specimens for genetic or molecular analysis in the current trial and for future use in ancillary studies, if applicable                                                                                      | n/a                  |
| 35 |                               |     |                                                                                                                                                                                                                                                                                     |                      |
| 36 |                               |     |                                                                                                                                                                                                                                                                                     |                      |

37 \*It is strongly recommended that this checklist be read in conjunction with the SPIRIT 2013 Explanation & Elaboration for important clarification on the items.  
 38 Amendments to the protocol should be tracked and dated. The SPIRIT checklist is copyrighted by the SPIRIT Group under the Creative Commons  
 39 "[Attribution-NonCommercial-NoDerivs 3.0 Unported](https://creativecommons.org/licenses/by-nc-nd/3.0/)" license.  
 40
